1 **rRNA Biogenesis Regulates Mouse 2C-like State by 3D Structure**  
2 **Reorganization of Peri-Nucleolar Heterochromatin**

3 **Hua Yu<sup>1, #</sup>, Zhen Sun<sup>1, #</sup>, Tianyu Tan<sup>1, #</sup>, Hongru Pan<sup>1, #</sup>, Jing Zhao<sup>1</sup>, Ling Zhang<sup>1</sup>, Jiayu Chen<sup>3</sup>, Anhua**  
4 **Lei<sup>1</sup>, Yuqing Zhu<sup>1</sup>, Lang Chen<sup>1</sup>, Yuyan Xu<sup>1</sup>, Ming Chen<sup>3</sup>, Shaorong Gao<sup>4</sup>, George Q. Daley<sup>5</sup>, Jin**  
5 **Zhang<sup>1, 2, 6, \*</sup>**

6 <sup>1</sup> Center for Stem Cell and Regenerative Medicine, Department of Basic Medical Sciences, Zhejiang  
7 University School of Medicine, Hangzhou, 310058, China. Institute of Hematology, Zhejiang  
8 University, Hangzhou, 310058, China.

9 <sup>2</sup> Zhejiang Laboratory for Systems & Precision Medicine, Zhejiang University Medical Center, 1369  
10 West Wenyi Road, Hangzhou 311121, China.

11 <sup>3</sup> College of Life Sciences, Zhejiang University, Hangzhou, China

12 <sup>4</sup> Clinical and Translational Research Center of Shanghai First Maternity and Infant Hospital,  
13 Shanghai Key Laboratory of Signaling and Disease Research, School of Life Sciences and Technology,  
14 Tongji University, Shanghai, China

15 <sup>5</sup> Stem Cell Transplantation Program, Division of Pediatric Hematology Oncology, Boston Children's  
16 Hospital; Department of Biological Chemistry and Molecular Pharmacology, Harvard Medical  
17 School, Boston, MA, USA. <sup>6</sup> Lead Contact.

18 # These authors contributed equally to this work.

19 \* Correspondence: zhgene@zju.edu.cn.

20

21 **Abstract**

22 Nucleolus is the organelle for ribosome biogenesis and for sensing various types of  
23 stress. Its role in regulating stem cell fate is unclear. Here, we present multiple lines of  
24 evidence that nucleolar stress induced by interfering rRNA biogenesis can drive 2-cell  
25 stage embryo-like (2C-like) transcriptional program and induce an expanded 2C-like  
26 cell population in mouse embryonic stem (mES) cells. Mechanistically, the nucleolar  
27 integrity mediated by rRNA biogenesis maintains the normal liquid-liquid phase  
28 separation (LLPS) of nucleolus and the formation of peri-nucleolar heterochromatin  
29 (PNH). Upon rRNA biogenesis defect, the natural LLPS of nucleolus is disrupted,

30 causing dissociation of NCL/TRIM28 complex from PNH and changes of epigenetic  
31 states and reorganization of the 3D structure of PNH, which leads to *Dux*, a 2C program  
32 transcription factor gene, to be released from the PNH region and activation of 2C-like  
33 program. Correspondingly, embryos with rRNA biogenesis defect are incompatible to  
34 develop from 2-cell (2C) to 4-cell embryos, with delayed repression of 2C/ERV genes  
35 and a transcriptome skewed toward earlier cleavage embryo signatures. Our results  
36 highlight that rRNA-mediated nucleolar integrity and 3D structure reshaping of PNH  
37 compartment regulates the fate transition of mES cells to 2C-like cells, and that rRNA  
38 biogenesis is a critical regulator during the 2-cell-to-4-cell transition of murine pre-  
39 implantation embryo development.

40

## 41 **Main**

42 Two-cell (2C) stage embryonic cells are totipotent cells in an earlier stage of embryo  
43 development and can generate all cell types of embryonic and extraembryonic tissues.  
44 In the culture of mouse embryonic stem (mES) cells, a rare population of mES cells  
45 sporadically transit into a 2C stage embryo-like (2C-like) cells with similar molecular  
46 features of totipotent 2C-stage embryos<sup>1-3</sup>. Recent works have demonstrated that the  
47 conversion of mES cells to 2C-Like cells is regulated by a variety of factors related to  
48 epigenetic modification, including histone methylation and acetylation<sup>1,4,5</sup> and DNA  
49 methylation<sup>6,7</sup>. In addition, it was also found that RNA hydroxymethylation<sup>8</sup> and  
50 protein sumoylation<sup>9</sup> can affect the epigenetic state of chromatin to regulate the  
51 activation of ERV genes. The structure of chromatin is an important epigenetic factor  
52 and is closely related to the regulation of gene expression and cell fate transition.  
53 Interestingly, chromatin structure appears to emerge as an important factor in 2C gene  
54 regulation and transition of mES cells to 2C-like cells. For instance, 2C/ERV gene  
55 activation is regulated by a pioneer transcription factor *Dux* which increases chromatin  
56 accessibility<sup>10-15</sup>, and two recent studies reported that the pluripotency factors DAPP2  
57 and DAPP4 and the maternal factor NELFA can bind to the promoter region of *Dux* and  
58 directly trans-activate its expression<sup>16,17</sup>. Moreover, 2C-like cells can be induced by

59 downregulation of chromatin remodeling factor CAF-1<sup>18</sup>. However, the molecular  
60 players of chromatin structure in mES cell to 2C-like cell transition have yet to be fully  
61 understood.

62 With the emergence and development of high-throughput chromatin conformation  
63 capture technology (Hi-C), the dynamic changes of higher-order chromatin structures  
64 during early embryonic development and stem cell differentiation have been  
65 elucidated<sup>19-22</sup>. Two-cell embryo or 2C-like cells show contrasting differences from  
66 inner cell mass or ES cells<sup>21,23</sup>, suggesting that the 3D chromatin structure is a key  
67 factor mediating the transition of mES cells to 2C-like cells. Importantly, one of the  
68 mechanisms of *Dux* expression is dependent on a complex of nucleolin NCL and  
69 heterochromatin factor TRIM28 in the Peri-Nucleolar Heterochromatin (PNH)  
70 region<sup>14,24,25</sup>. However, it is not completely known how nucleolus integrity influences  
71 higher-order chromatin structure and how the chromatin structure determines *Dux*  
72 expression.

73 Here, we found that inhibition of nucleolar rRNA biogenesis triggered nucleolar stress  
74 which activated 2C-like transcriptional program and induced an expanded 2C-like cell  
75 population in mES cells with a mechanism involving 3D structure reorganization of the  
76 PNH and the *Dux* expression. Consistently, 3D structure of PNH reorganizes after early  
77 2-cell during murine early embryo development, which coincides with rRNA biogenesis  
78 and *Dux* repression. Moreover, in mouse early embryos, rRNA biogenesis and matured  
79 nucleolus are indispensable for the 2-cell to 4-cell transition. Taken together, our  
80 findings for the first time provided a novel mechanistic perspective of rRNA biogenesis  
81 in regulating the homeostasis between 2C-like and mES cells and highlighted that rRNA  
82 biogenesis in the nucleolus is a critical molecular switch from ZGA gene expressing 2-  
83 cell stage to nucleolus-matured blastocyst stage embryos.

84

## 85 **Results**

86 Inhibition of rRNA biogenesis activated the 2C-like transcriptional program  
87 and induced an expanded 2C-like cell population in mES cells

88 We first explored whether nucleolar stress produced by inhibiting rRNA biogenesis  
89 could induce cell fate reprogramming to 2C-like cells (2CLCs) by performing RNA-seq  
90 analysis of mES cells treated by three inducers of cellular stress, including CX-5461, an  
91 RNA polymerase I (Pol I) inhibitor; rotenone, an electron transport chain complex 1  
92 inhibitor, and rapamycin, a mTOR pathway inhibitor (CX-5461 treatment dosage: 2uM,  
93 CX-5461 treatment time: 12h; rotenone treatment dosage: 1uM, rotenone treatment  
94 time: 12h; rapamycin treatment dosage: 2uM, rapamycin treatment time: 12h). We  
95 found that nucleolar stress induced by CX-5461<sup>26,27</sup> activated the 2-cell marker genes  
96 *Zscan4d*, *Dux* and *Gm12794* and repressed pluripotent marker gene *Pou5f1*. However,  
97 the other two cellular stresses upon rotenone or rapamycin treatment did not  
98 influence the expression of these genes (Fig.1a-1b and Extended Data Fig.S1a-S1b).  
99 The 2C-like transcriptional program was characterized by activation of transposable  
100 elements (TEs), particularly major satellite repeats (GSAT\_MM) and ERVL subclasses  
101 MERVL-int and MT2\_Mm. We systematically examined ERV genes and found global  
102 up-regulation of GSAT\_MM and each LTR class (Fig.1C and Extended Data Fig.S1e),  
103 particularly GSAT\_MM, MERVL-int and MT2\_Mm sub-classes, in CX-5461-treated mES  
104 cells (Fig.1c and Extended Data Fig.S1c-S1d). However, the other two types of stress,  
105 did not activate these repeat elements (Fig.1c and Extended Data Fig.S1c-S1d). Using  
106 unsupervised K-means clustering analysis, we identified four gene clusters specifically  
107 expressed in different stages during mouse pre-implantation embryo development  
108 (Extended Data Fig.S1f)<sup>28</sup>. We found that CX-5461 treatment upregulated 2-cell  
109 expressing cluster 1 (C1) and 2-cell/4-cell expressing cluster 2 (C2) genes, and  
110 decreased genes expressed in other two stages (C3 and C4) (Fig.1d and Extended Data  
111 Fig.S1f). Yet, other two cellular stresses did not induce this expression pattern (Fig.1d  
112 and Extended Data Fig.S1f). Moreover, unsupervised hierarchical clustering of  
113 transcriptomes of pre-implantation embryos and mES cells from published studies of  
114 2C-like cells confirmed that mES cells treated with CX-5461 were most like the sorted  
115 2CLCs from mES cells, or genetically modified mES cells with 2CLC signatures from  
116 other studies as well as the 2C embryos<sup>1,11,14,16-18,29-31</sup> (Fig.1e). As expected, we

117 observed the abundance of rRNA is significantly reduced under CX-5461 treatment  
118 (Extended Data Fig.S1g). Together, these results demonstrate that nucleolar stress  
119 induced by rRNA biogenesis defect activated 2C-like transcriptional program in mES  
120 cells.

121 We next asked how the population homeostasis of 2CLCs and ES cells altered in  
122 response to rRNA biogenesis defect at the single cell level. In line with bulk RNA-seq  
123 data, we observed that the 2C marker genes are up-regulated and pluripotent genes  
124 were downregulated in CX-5461-treated mES cells (Extended Data Fig.S1h-S1j). As  
125 expected, we found a marked expansion of the population with MERVL expression in  
126 mES cells treated with CX-5461 (Fig.1f). Strikingly, we observed that the expression  
127 level of MERVL genes showed significant negative correlation with ribosomal protein  
128 genes (Fig.1g-1i and Extended Data Fig.S1k). Using a 2C::*tdTomato* reporter in which a  
129 *tdTomato* gene is under control of a MERVL promoter, we examined 2C status of  
130 individual cells by Fluorescence Activated Cell Sorting (FACS) analysis. Consistent with  
131 single-cell RNA-seq data, we observed that CX-5461-treatment induced a significant  
132 increase in the number of tdTomato positive (2C::tdTomato+) mES cells in a dose-  
133 dependent manner (Fig.1j and Extended Data Fig.S1l). Moreover, the percentage of  
134 tdTomato positive cells was largely maintained even at 24 hours after CX-5461  
135 withdrawal (Fig.1k). Importantly, although CX-5461, mostly at a high concentration,  
136 induced mild cell apoptosis, the majority of tdTomato positive cells were negative for  
137 the apoptosis markers Annexin-V and DAPI<sup>32</sup> (Extended Data Fig.S1m-S1o), suggesting  
138 that the emergence of 2C::tdTomato+ cells under CX-5461 treatment was not due to  
139 the activation of apoptosis pathway. Collectively, these results demonstrate that  
140 inhibiting rRNA biogenesis induced a shift of the ES cell homeostasis toward the  
141 MERVL-expressing and ribosomal gene repressed 2CLCs<sup>33,34</sup>.

142

143 Deficiency of rRNA biogenesis disrupted normal nucleolar LLPS and  
144 epigenetic state of PNH

145 As it has been reported that ribosomal RNA plays a critical role in maintaining phase

146 separation of nucleolus<sup>35-37</sup> and phase-to-phase transition is involved in nucleolar  
147 stress<sup>37,38</sup>, we examined whether nucleolar stress induced by rRNA biogenesis defect  
148 leads to changes of nucleolar phase separation. Using electron microscopy, we  
149 observed that CX-5461-treated mES cells displayed abnormal nucleolar structure,  
150 missing the outer layer usually associated with dense electron intensity (Fig.2a).  
151 Immunofluorescence of key granular compartment (GC) and nucleolar dense fibrillar  
152 component (DFC) marker proteins NPM1 and NCL revealed that CX-5461 treatment  
153 led to disappearance of the NPM1- and NCL-marked “ring” structure (Fig.2b-2c).  
154 Immunofluorescence of FBL and RPA194 protein also showed abnormal localization  
155 with aggregated pattern in the nucleolus upon treatment (Fig.2d-2e). Consistently,  
156 Fluorescence Recovery After Photobleaching (FRAP) analysis revealed that CX-5461  
157 treatment markedly increased the mobility of NCL, NPM1 and FBL (Fig.2f-2h). Together,  
158 these data demonstrate that nucleolar stress caused disrupted assembly of the phase-  
159 separated nucleolar sub-compartments, which became fused and more dynamic  
160 liquid-like droplets<sup>37,38</sup>.

161 As it has been observed that phase separation can regulate the epigenetic state of  
162 chromatin<sup>39-41</sup>, we examined the epigenetic changes at the loci of the peri-nucleolar  
163 heterochromatin (PNH) region in CX-5461-treated mES cells. It has been reported that  
164 transcriptionally inactive genomic regions organize into Inactive Hubs around the  
165 nucleolus<sup>42</sup>. In addition, the Nucleolar Associated Domains (NAD) or LINE1/L1 repeat  
166 sequence regions are also defined as repressive chromosomal segments enriched with  
167 peri-nucleolar heterochromatin<sup>43-49</sup>. We thus examined the epigenetic changes on  
168 these regions and found decreased H3K9me3 and H3K27me3 levels in CX-5461 treated  
169 cells (Fig.2i-2k, Extended Data Fig.S2a and Extended Data Fig.S2b). Moreover, we  
170 observed increased H3K4me3 and H3K27ac levels and improved chromatin  
171 accessibility at Inactive Hub<sup>42</sup>, NAD<sup>43,45</sup> and L1 regions (downloaded from UCSC Table  
172 Browser) in CX-5461 treated cells (Fig.2l-2n, Extended Data Fig.S2c-S2g). Previous work  
173 has reported that nucleolar protein nucleolin NCL and its interacting partner the  
174 heterochromatin protein TRIM28 repress 2C-like program by maintaining the PNH

175 region in mES cells<sup>14</sup>. The disappeared NCL-marked “ring” structure suggested that  
176 rRNA biogenesis defect promoted the dissociation of NCL/TRIM28 complex from PNH  
177 region. To validate this, we conducted ChIP-seq experiment to investigate the binding  
178 changes of NCL/TRIM28 complex on the loci of the PNH region in CX-5461-treated mES  
179 cells and found decreased binding of NCL and TRIM28 proteins on Inactive Hub, NAD  
180 and L1 regions (Fig.2o-2q, Extended Data Fig.S2e and Extended Data Fig.S2f).  
181 Altogether, these results demonstrated the rRNA biogenesis defect affected the  
182 normal nucleolar phase separation and changed the epigenetic state of the  
183 heterochromatic regions at the periphery of nucleolus by breaking up the binding of  
184 NCL/TRIM28 complex on the PNH region.

185

## 186 2C/ERV genes were activated through Dux

187 Recent studies have reported that a pioneer transcription factor, the DUX protein,  
188 directly binds to promoters and LTR elements on 2C genes and repetitive elements and  
189 activates their transcription<sup>10-12</sup>. As *Dux* expression has been reported to be influenced  
190 by nucleolar protein NCL<sup>14</sup>, we speculated that *Dux* is the key molecular regulator for  
191 nucleolar stress-mediated activation of 2C-like transcriptional program. To this end,  
192 we performed the binding motif sequence enrichment analysis of transcription factors  
193 on 5258 genes induced by CX-5461. We found that the significantly enriched motifs  
194 include both p53 binding sites and Dux binding sites (Fig.3a). In line with this, we found  
195 that 1229 CX-5461-induced genes are p53 direct target genes (Fig.3b, hypergeometric  
196 test, p-value=0)<sup>50</sup>, consistent with the fact that p53 signaling is usually activated under  
197 nucleolar stress<sup>51-57</sup>. We further analyzed the overlap between CX-5461 treatment-  
198 induced genes and *Dux* over-expression-induced genes using published RNA-seq data  
199 <sup>11</sup>, and found 621 genes are overlapped (Fig.3b, hypergeometric test, p-value= 2.96e-  
200 195). Using p53 and Dux ChIP-seq data in mES cells <sup>11,50</sup>, we further observed that both  
201 p53 and Dux showed a pattern of binding to the transcriptional start site (TSS) of CX-  
202 5461-induced genes (Fig.3c). The binding pattern of Dux on these genes is weaker  
203 when comparing with the strong binding of p53 on CX-5461-induced genes. This was

204 expected as CX-5461 induces many genes that are p53 target, but not Dux target.  
205 Interestingly, we found that p53 favors to bind specifically to CX-5461-induced genes,  
206 while Dux exclusively binds to the commonly induced genes between CX-5461-treated  
207 and *Dux*-overexpressed cells (Fig.3d), and to ERV genes induced by CX-5461 (Fig.3e-3f).  
208 Consistently, a significant increase of chromatin accessibility in the promoter region is  
209 not observed for 4637 CX-5461-induced genes but is observed for 621 commonly  
210 induced genes or 10173 CX-5461-induced ERV genes in *Dux*-overexpressed mES cells  
211 <sup>11</sup> (Extended Data Fig.S3a). In addition, we observed the decreased H3K9me3 and  
212 H3K27me3 levels and increased H3K4me3 and H3K27ac levels around Dux locus  
213 (Extended Data Fig.S3b). These analyses suggested that nucleolar stress-induced 2C  
214 activation is through *Dux*. To validate this hypothesis, we silenced *Dux* expression in  
215 CX-5461-treated mES cells and found that it reversed the 2C/ERV gene induction  
216 (Fig.3g). We further performed ChIP-qPCR experiments to assess the changes of  
217 H3K9me3 & H3K27me3 levels and Dux binding of CX-5461 induced 2C marker genes  
218 after Dux silencing. We observed that, after Dux silencing, both H3K9me3 and  
219 H3K27me3 are increased, in contrast, Dux binding is decreased for CX-5461 induced  
220 2C genes (Fig 3h-3j). When the Dux silenced mES cells are treated with CX-5461, we  
221 observed that H3K9me3 and H3K27me3 levels, and Dux binding on CX-5461 induced  
222 2C genes are reversed (Fig 3h-3j). We also performed ATAC-seq experiment to assess  
223 the changes of chromatin accessibility after Dux silencing. In well support with these  
224 results, we observed that chromatin accessibility of CX-5461 induced 2C genes is  
225 decreased in Dux silenced mES cells, and this reduction is reversed by CX-5461  
226 treatment (Fig 3k). These results demonstrated that nucleolar stress induced 2C/ERV  
227 gene activation through a Dux. In line with Dux's role in chromatin accessibility, we  
228 observed that the 621 commonly induced genes and 10173 CX-5461 induced ERV  
229 genes have increased chromatin accessibility, and decreased H3K9me3 and H3K27me3  
230 levels when comparing CX-5461 treated mES cells with control mES cells or comparing  
231 2-cell embryos with ICM stage embryos <sup>28,29,58</sup> (Extended Data Fig.S3c-S3h). In addition,  
232 we also found increased H3K4me3 and H3K27ac levels of 621 commonly induced



233 genes and 10173 CX-5461 induced ERV genes in CX-5461 treated mES cells (Extended  
234 Data Fig.S3i-S3j). Collectively, these results demonstrated that nucleolar stress  
235 induced a 2C-like transcriptional and epigenetic program in mES cells through *Dux*.

236

237 **rRNA biogenesis defect drove 3D chromatin structure reorganization of**  
238 **PNH and MERVL regions towards the 2C-like state**

239 The disassembly of PNH region suggested that the 3D chromatin structure within PNH  
240 region might have reshaped under CX-5461 treatment. To explore the reorganization  
241 of 3D chromatin conformation landscape of CX-5461-treated mES cells relative to  
242 control mES cells, we performed *in situ* Hi-C with more than four hundred million  
243 sequenced raw read pairs per sample. We observed obviously decreased higher-order  
244 chromatin interactions within PNH region indicated by the Inactive Hub, NAD and L1  
245 regions in the treated cells (Fig.4a-4c, compared with randomly selected genomic  
246 regions, Mann-Whitney U test, the replicates of experiment n=10, averaged *p*-  
247 values=0, 0, 3.42E-06 for Inactive Hub, NAD and L1, respectively). Moreover, the *Dux*  
248 locus is significantly further away from the PNH region as characterized by the largely  
249 decreased Hi-C contacts (Fig.4a-4c and Fig.4g-4i, compared with randomly selected  
250 genomic regions, Mann-Whitney U test, the replicates of experiment n=10, averaged  
251 *p*-values=1.65E-05, 7.82E-05, 2.68E-03 for Inactive Hub, NAD and L1, respectively). We  
252 further analyzed the 3D chromatin structural correlation within PNH region, and  
253 between the *Dux* locus and PNH region by comparing Hi-C pearson correlation  
254 coefficient (PCC) matrix of control and CX-5461-treated mES cells. We observed the  
255 obviously decreased 3D chromatin structural correlation within PNH region (compared  
256 with randomly selected genomic regions, Mann-Whitney U test, the replicates of  
257 experiment n=10, averaged *p*-values=0 for all Inactive Hub, NAD and L1) and between  
258 the *Dux* locus and PNH region (compared with randomly selected genomic regions,  
259 Mann-Whitney U test, the replicates of experiment n=10, *p*-values=1.86E-6, 5.03E-6,  
260 4.02E-5 for Inactive Hub, NAD and L1, respectively) (Fig.4d-4f and Fig.4j-4l). We further  
261 validated the above findings using DNA Fluorescence in Situ Hybridization (FISH) and

262 found that the *Dux* locus and a locus within PNH region located further from the peri-  
263 nucleolar region indicated by NCL staining in the CX-5461-treated cells (Fig.4m).  
264 Interestingly, by performing the same analysis as above on public Hi-C data of mouse  
265 pre-implantation embryo development<sup>21</sup>, we observed that a similar trend of 3D  
266 chromatin structure reorganization of PNH and *Dux* regions when comparing early 2-  
267 cell embryos with ICM stage embryos, namely, the 2-cell embryos showed less  
268 organized PNH and less contacts between the *Dux* Locus and the PNH (Extended Data  
269 Fig.S4a-S4d), suggesting a process of maturation of PNH 3D structure organization and  
270 of the *Dux* release from the PNH during embryo development. Interestingly, we  
271 observed that 3D structure reorganization of PNH was initiated during early 2-cell to  
272 late 2-cell transition, which coincides with the beginning of shutting down *Dux* gene  
273 expression during murine early embryo development (Extended Data Fig.S4a-S4d and  
274 Extended Data Fig.S6d).

275 As it has been reported that 2CLCs display increased three-dimensional structural  
276 plasticity relative to mES cells<sup>23</sup>, we next asked whether the global 3D chromatin  
277 architecture is changed in CX-5461-treated mES cells. We compared control and CX-  
278 5461-treated mES cells Hi-C maps, with lymphoblastoid cells as a reference for full  
279 differentiated cells<sup>59</sup>. A global analysis of A(active)/B(inactive) compartment strength  
280 showed a slight decrease of contacts within the B compartments in CX-5461-treated  
281 mES cells compared with control mES cells (Extended Data Fig.S4e-S4h). However, at  
282 topologically associating domain (TAD) or chromatin loop level, we found a mild  
283 increase in their strength in CX-5461-treated mES cells (Extended Data Fig.S4i-S4m). To  
284 specifically investigate 2C-related genes, we further performed an analysis of local  
285 architectural differences around *MERVL* loci. We found that the insulation scores<sup>60</sup> of  
286 chromatin around *MERVL* genes activated by CX-5461 treatment is markedly increased  
287 both globally (Extended Data Fig.S4n) and at local *MERVL* sites (Fig.4o), similar as  
288 observed in 2-cell embryos compared with ICM<sup>23</sup> (Fig.4o), and the topological  
289 associated domain (TAD) structure around *MERVL* gene loci is more obvious (Fig.4o  
290 and Extended Data Fig.S4o), showing a more similar pattern as that in 2-cell embryos<sup>21</sup>

291 (Fig.4n). The chromatin structure reorganization around *MERVLS* is accompanied with  
292 more open chromatin states around *MERVLS* both globally (Extended Data Fig.S4n)  
293 and locally (Fig.4o and Extended Data Fig.S4o) and with their increased expression  
294 (Extended Data Fig.S4n). These results together demonstrate that nucleolar stress  
295 promoted the transformation of mES cells to 2C-like cells with reshaped 3D chromatin  
296 structure and its associated epigenetic status to facilitate gene expression, particularly  
297 at the PNH and *MERVL* regions.

298

299 Genetic perturbation of rRNA biogenesis recapitulated CX-5461-induced  
300 2C-like molecular phenotypes

301 To further investigate the critical role of rRNA biogenesis in regulating the 2C program  
302 and the homeostasis between mES cells and 2C-like cells, we generated two rRNA  
303 biogenesis-inhibited mES cell lines: 1) a line with degraded Pol I protein (PRA1) by an  
304 auxin-inducible degron system<sup>61</sup> (Fig S5a), and 2) a snoRNA knockout line (SNORD113-  
305 114 gene cluster, a gift from Pengxu Qian) (Fig S5b), as snoRNAs are required for rRNA  
306 modification and biogenesis. Using these two cell lines, we performed DNA FISH  
307 experiments and found the similar molecular phenotypes of CX-5461-treated mES cells,  
308 i.e., the *Dux* locus and a representative locus within PNH region located further from  
309 the peri-nucleolar region (Fig.5a-5d). We then carried out FRAP experiments and  
310 consistently observed significantly increased mobility of NCL and NPM1 proteins in  
311 these two cell lines compared with their wild-type controls (Fig.5e-5h and Extended  
312 Data Fig.S5c-S5f). In line with these, we found that the 2C marker genes, including  
313 *MERVL*, *Dux*, *Zscan4d*, *Gm12794* and *Gm4340*, were significantly activated in these  
314 two cell lines (Fig.5i and Fig.5j). Moreover, using FACS analysis, we observed a  
315 significant increase of the percentage of tdTomato positive cells in these two cell lines  
316 compared with control cells (Fig.5k, Fig.5l, Extended Data Fig.S5g and Extended Data  
317 Fig.S5h). Collectively, these results further confirmed that repressing rRNA biogenesis  
318 can activate 2C-like program and induce the transition of mES cells to 2C-like cells.

319

320 rRNA biogenesis is critically required at the 2-cell-to-4-cell stage transition  
321 during pre-implantation embryo development

322 To better understand whether the physiological function of rRNA biogenesis is to  
323 facilitate embryo development during and after the 2-cell exit, we first inspected rRNA  
324 expression levels in all stages of pre-implantation mouse embryos. The precursor and  
325 matured rRNA levels were low in MII-oocyte, pronuclear zygote, early 2-cell and  
326 middle 2-cell stages but increased sharply from the late 2-cell stage to the blastocyst  
327 stage (Fig.6a). We then analyzed the expression levels of different subunit genes of  
328 RNA polymerase I (Pol I) in pre-implantation embryos. Different from rRNA expression,  
329 Pol I gene mRNA levels increased significantly from the late 2-cell stage to 4-cell stage  
330 but decreased markedly as embryos progressed through 8-cell, morula stages, and  
331 reached to blastocysts which still had a higher level than those stages before the late  
332 2-cell (Fig.6b). Consistent with Pol I genes, we observed the similar pattern of  
333 increased expression of ribosome biogenesis genes (Extended Data Fig.S6a). This  
334 indicated that while the levels of rRNA was gradually accumulated during pre-  
335 implantation embryo development, the rRNA biogenesis rate reached to a peak during  
336 the late 2-cell to the 4-cell stage. In contrast, the ERV and 2C marker genes, such as  
337 *Dux*, *Zscan4d* and *Gm12794* were significantly decreased during the late 2-cell-to-4-  
338 cell stage (Extended Data Fig.S6b-S6d). This reciprocal expression pattern between 2C  
339 marker genes and rRNA biogenesis genes suggested that rRNA biogenesis may play a  
340 key role in shutting down the 2C program, as revealed by our 2CLC emergence analysis  
341 in cultured mES cells, and in promoting the transition from the 2-cell to the 4-cell stage.  
342 We next applied CX-5461 (an embryo tolerable concentration) to mouse early embryos  
343 as they progress through pronuclear zygotes to blastocysts. When compared with the  
344 control embryos, we found that CX-5461-treated embryos were indeed blocked before  
345 the 4-cell stage (Extended Data Fig.S6e). We further divided mouse embryos into four  
346 groups according to the different stages of CX-5461 treatment, including transitions of  
347 zygote-to-2-cell, 2-cell-to-4-cell, and morula-to-blastocyst, respectively (Fig.6c).  
348 Compared with the untreated control, we found that blastocyst formation rates of all

349 three CX-5461-treated groups were decreased, and the 2-cell-to-4-cell-treated group  
350 showed the strongest decrease of the blastocyst formation rate at both early and late  
351 blastocyst stages (Fig.6d). This is consistent with the pattern of Pol I gene RNA  
352 expression and the pattern of PNH reshaping after early 2-cell stage during pre-  
353 implantation embryo development (Extended Data Fig.S4a-S4d), indicating that rRNA  
354 biogenesis is most critically required during the 2-cell-to-4-cell transition compared  
355 with other stages. In well support with this, the knockout of *Polr1a* gene led to mouse  
356 embryos arrested at 2-cell<sup>62</sup>. Moreover, upon successful inhibition of rRNA biogenesis  
357 at the morula/blastocyst stage (Fig.6e), we found the disappearance of the NPM1- and  
358 NCL-marked “ring” structure and abnormal localization and reduced signal density of  
359 FBL in the nucleolus (Extended Data Fig.S6f). Importantly, we observed increased  
360 expression of 2C genes such as *Zscan4d*, *Gm4340*, *Dux* and *Mervl-pol* (Fig.6f). RNA-seq  
361 also demonstrated up-regulated C1 and C2 clusters of 2C genes (Fig 6g) defined before  
362 (Fig S1e) as well as ERV genes (Fig 6h-6j) in CX-5461-treated embryos compared with  
363 controls, consistent with the results from mES cells described above (Fig.1c and  
364 Extended Data Fig.S1d). Altogether, these data demonstrated rRNA biogenesis and  
365 nucleolar integrity is a molecular switch for the transition from the 2-cell to the 4-cell  
366 embryos.

367

## 368 Discussion

369 Starting from zygotic genome activation (ZGA) at the 2-cell stage, an embryo  
370 undergoes through the four/eight-cell, morula, blastocyst stages, and then prepares  
371 itself for implantation. Along with this pre-implantation development process, basic  
372 anabolic metabolism and translational processes become more active. Nucleoli, the  
373 organelles involved in translation, functionally mature from nucleolar precursor bodies  
374 (NPB) during this process<sup>63-65</sup>. Interestingly, a recent research work reported that  
375 TRIM28/Nucleolin/LINE1 complex that can mediate both ZGA gene Dux repression and  
376 rRNA expression<sup>14</sup>, suggesting that shutting down ZGA and initiating nucleoli  
377 formation are not independent events but interconnected. However, a complete

378 picture on how the transition between ZGA and nucleolar formation occurs in the  
379 nucleus is not fully understood.

380 Here, we reported that nucleolar rRNA biogenesis and higher-order 3D chromatin  
381 structure remodeling of PNH might coordinate to develop during the 2-cell to later  
382 stage transition, and we found that mES cells cultured *in vitro* can transform into 2C-  
383 like cells upon nucleolar stress caused by repressing rRNA biogenesis. We propose a  
384 mechanistic model for the novel role of rRNA biogenesis in regulating the 2C-like  
385 program and the homeostasis between 2C-like cells and mES cells (Fig 7). In the  
386 unperturbed mES cells, nucleolar integrity mediated by rRNA biogenesis maintains the  
387 normal the liquid-liquid phase separation (LLPS) of nucleolus and the formation of  
388 peri-nucleolar heterochromatin (PNH) containing *Dux*, and this normal nucleolar LLPS  
389 facilitated NCL/TRIM28 complex occupancy on the *Dux* locus to repress *Dux* expression.  
390 In contrast, in the rRNA biogenesis-repressed mES cells, the natural liquid-like phase  
391 of nucleolus is disrupted, causing dissociation of the NCL/TRIM28 complex from the  
392 PNH and changes of epigenetic state and 3D structure of the PNH, which eventually  
393 leads to *Dux* to be released from the PNH region, activation of 2C-like program and  
394 transition of mES cells to 2C-like cells. Given the dynamic regulation of nucleolus and  
395 rRNA gene chromatin during early embryo development and the sensitivity of  
396 embryos to environmental stress at the early stages, it is conceivable that embryos  
397 may use the mechanisms elucidated above to ensure its safe development.

398 Nucleolus, the largest membrane-less condensate in a cell, is a stress-sensitive  
399 organelle and ensure quality control of nuclear proteome under stress<sup>37,38</sup>. Its  
400 association with heterochromatin in its periphery confers genetic regulation of key cell  
401 fate decision factors such as *Dux* in pluripotent stem cells. Previous studies on  
402 nucleolus in stem cells mainly focused on the role of rRNA and its associated chromatin  
403 in the context of ES cell self-renewal and differentiation or exit of pluripotency<sup>44,57,66</sup>.  
404 In contrast, our work for the first time provided a novel perspective in reprogramming  
405 mES cells back to 2C-like cell, and in nucleolar phase separation and 3D chromatin  
406 structure remodeling at the PNH. These findings are in line with the emerging notion

407 that phase-separated condensates regulate transcription, epigenetics, and higher-  
408 order chromatin structure<sup>39-41,67-70</sup>, and shed light on a previously neglected area of  
409 nucleolus-associated condensates in chromatin control during early development. It is  
410 being worth mentioned that we do not intend to overstate that the fate transition of  
411 mES to 2C-like cell triggered by rRNA biogenesis defect are explained by LLPS<sup>71</sup>. What  
412 we observed is that the integrity of nucleolus mediated by rRNA biogenesis maintains  
413 the normal nucleolar LLPS and 3D structure of PNH. It is possible that 3D structure  
414 reshaping of PNH mediated by nucleolar LLPS is a common thread of RNA and protein-  
415 mediated Dux silences and 2C repression (e.g., rRNA, snoRNA, LINE1 RNA, NCL,  
416 TRIM28 and LIN28). The NCL/TRIM28 complex or other nucleolar proteins of GC layer  
417 and heterochromatin proteins, e.g., NPM1 and HP1, is possible the key regulating  
418 factors connecting nucleolar LLPS and the establishment and maintenance of PNH. Our  
419 study gives a starting clue that the LLPS model is important for the assembly and  
420 function of nucleolus<sup>37</sup> with the implication of gene regulation, and the quantitative  
421 and mechanistic models merit future investigations.

422

## 423 **Methods**

### 424 **Cell culture**

425 E14 mES cells were cultured on 0.1% gelatin-coated plates with MEF feeder cells in  
426 N2/B27/LIF/2i medium (1:1 mix of DMEM/F12 (11320-033, Gibco) and Neurobasal  
427 medium (21103-049, Gibco) containing 1×N2 and B27 supplements (17502-  
428 048/17504-044, Life Technologies), 100 μM non-essential amino acids (GNM71450,  
429 GENOM), and 1,000 U/ml LIF (PEPRO TECH), 1 μM PD03259010 and 3 μM CHIR99021  
430 (STEMCELL Technologies) and 100 U/ml penicillin, 100 μg/ml streptomycin (15140-122,  
431 Gibco). For primed state media, 20 ng/ml Activin, 10 ng/ml FGF2, and 1% KSR were  
432 added to the 1:1 DMEM/F12 and Neurobasal medium containing N2 and B27. To  
433 investigate DUX binding, an N-terminal FLAG-DUX protein was expressed in our clonal  
434 cell lines. In Control group, mES cells were treated with doxycycline for 12h to induce  
435 FLAG-DUX expression and then treatment of negative-control Silencer Select siRNA. In

436 siDux group, mES cells were treated with doxycycline for 12h and then siDUX for two  
437 days. In CX-5461 treatment group, mES cells were treated with doxycycline for 12h and  
438 then treatment of CX5461. In siDux+CX-5461 group, mES cells were treated with  
439 doxycycline for 12h and then siDUX for two days followed by treatment of CX-5461.

440

#### 441 Fluorescence activated cell sorting (FACS) analysis

442 The E14 2C::*tdTomato* cells were generated as in <sup>1</sup>. E14 mES cells were transfected with  
443 2C::*tdTomato* using Lipofectamine 2000 and selected with 150 µg/ml hygromycin 48  
444 hr after transfection and for 7 days. Mouse E14 wild-type cells were subjected to  
445 0.4µM CX-5461 treatment for 12h or 2µM CX-5461 treatment for 12h. Cells were  
446 isolated by FACS to measure the ratio of 2C-like cells. Apoptosis was measured using  
447 the Annexin V and DAPI Staining.

448

#### 449 Cell line immunofluorescence staining

450 E14 mES cells were grown on gelatin-coated glass coverslips with MEFs and cultured  
451 12 h before fixed with 4% PFA for 10 min, and then permeabilized with 0.5% Triton X-  
452 100 in PBS for 20 min at room temperature (RT). The cell samples were blocked in  
453 blocking buffer (3% BSA, 2% donkey serum in PBS) for 10 min at RT and then stained  
454 with a primary antibody (1:200, Nucleolin, CST, 145745; 1:400, NPM1, Sigma, B0556;  
455 1:200, Fibrillarin, Abcam, ab4566; RPA194, 1:50, Santa Cruz, sc-48385) for 12 h at 4 °C.  
456 After three washes with 0.1% Triton X-100 in PBS, cells were stained with a secondary  
457 antibody (1:200, Goat polyclonal Secondary Antibody to Mouse IgG, Abcam, ab150113)  
458 for 2-12 h at 4 °C. Followed by washing three times with 0.5% Triton X-100/PBS, DAPI  
459 was used for nucleus staining. The samples were then imaged by Zeiss LSM880  
460 fluorescence microscope at a 63×oil objective. For high resolution microscopy imaging,  
461 LSM800 with Airyscan module was used.

462

#### 463 Fluorescence recovery after photobleaching (FRAP) analysis

464 E14 wild-type and CX-5461 treatment mES cells cultured on MEF cells were grown in  
465 N2B27/LIF/2i conditions and maintained at 37 °C and with 5% CO<sub>2</sub> during image



466 acquisition. Cells were transduced with Lenti-NCL-GFP / Lenti-NPM1-GFP / Lenti-FBL-  
467 mCherry lentivirus. FRAP experiments were performed on a ZEISS (Jena, Germany)  
468 LSM800 confocal laser scanning microscope equipped with a ZEISS Plan-APO  
469 63x/NA1.46 oil immersion objective. Circular regions of constant size were bleached  
470 and monitored overtime for fluorescence recovery. Bleaching was once every 10  
471 seconds for a total of 10 minutes. Fluorescence intensity data was corrected for  
472 background fluorescence and normalized to initial intensity before bleaching using  
473 GraphPad software. Resulting FRAP curves were fitted with Four parameter logistic  
474 (4PL) curve.

475

#### 476 siRNA-mediated knockdown in mES cells

477 siRNA transfections were performed in mES cells with Lipofectamine 2000 (Thermo  
478 Fisher Scientific). mES cells were seeded into 12-well plate and cultured in LIF/2i  
479 medium for overnight. The next day, 800  $\mu$ l LIF/2i medium without antibiotics was  
480 added into each well. Then, the transfect mixture (40 pmol of 3 independent siRNA  
481 targeting each gene/a non-targeting siRNA (negative control, NC) and 2  $\mu$ l of Lipo 2000  
482 which was diluted in 200  $\mu$ l Opti-MEM medium (Gibco)) was added into each well and  
483 incubated for 6 hr at 37 °C. After incubation, the medium was exchanged for fresh  
484 complete LIF/2i medium and cells were harvested for RNA extraction approximately  
485 48 hr later. The sequences of siRNA are listed in Supplementary Table 1.

486

#### 487 Cell line RNA extraction and qRT-PCR

488 Total RNA was isolated from mES cells using miRNeasy kit (217004, QIAGEN) according  
489 to the manufacturer's protocol, and 1  $\mu$ g RNA was reverse transcribed to cDNA with  
490 HiScript II Q RT Super Mix (R223-01, Vazyme). Gene expression was analyzed with  
491 SYBR-Green qPCR Master mix (Bio-Rad) on Bio-Rad PCR machine (CFX-96 Touch). Each  
492 gene was normalized to Actin or Gapdh. All primers used are listed in Supplementary  
493 Table 2.

494

## 495 Oligopaint DNA FISH

496 The Oligopaint DNA FISH probe was designed according to several previous publication.  
497 The encoding probes were designed as previous described<sup>72,73</sup> and the targeted  
498 genomic region was designed by OligoMiner<sup>74</sup>. The probe pools synthesized by Synbio  
499 Technologies were used as templates and the dye-labeled secondary probes were  
500 produced by Sunya Biotechnology. All sequences used in this work were listed in  
501 Supplementary Table 3. Briefly, the synthesized probe pool was first used as template  
502 to amplify via 30 PCR cycles and was subsequently purified by ammonium acetate  
503 precipitation. Then, the previous PCR products was used as template to amplify and  
504 convert into RNA via an *in vitro* transcription of high yield (New England Biolabs,  
505 E2040S); the RNA product above were converted back into single-stranded DNA via  
506 reverse transcription. At last, the product was subjected to the alkaline hydrolysis to  
507 remove template RNA and was further purified by ammonium acetate precipitation.  
508 For the secondary probe, a 30 bp random oligo was designed as previous and attached  
509 with Cy3 or Alexa Flour 647 at 5' end.

510 For DNA FISH, the cell samples were fixed in 4% Paraformaldehyde (Sigma, 158127)  
511 for 10 minutes and washed two times with PBS, followed by permeabilizing with 0.5%  
512 Triton X-100 (Sigma, T8787) in PBS. Then the samples were incubated in 0.1% w/v  
513 sodium borohydride (Sigma, 71320) for 10 minutes and treated with 0.1M HCl for 5  
514 minutes. After that, the cell samples were incubated in 0.1 mg/ml RNase A diluted in  
515 PBS for 45 minutes in 37°C. After washing three times in 2x SSCT (2x SSC + 0.1% Tween-  
516 20), the samples were immersed in 50% formamide diluted in 2x SSCT for 15 minutes  
517 at room temperature then transferred to 85°C for 10 minutes. The primary probe and  
518 secondary probe were freshly mixed into hybridization buffer (2x SSC, 50% formamide,  
519 20% dextran sulfate) at 6 µM and 1 µM final concentration and dropped on samples.  
520 The samples were heated at 85 °C for 20 minutes and transferred to a 37 °C incubator  
521 before hybridization overnight. For the co-immunostaining, the cell samples above  
522 were washed three times in PBS and then incubated with primary antibody (1:200,  
523 Nucleolin, CST, 145745) for 12 h at 4°C. After three times of washing with PBS, Donkey

524 anti-Rabbit secondary antibody (1:200, Abcam, ab150077) was performed and  
525 incubated for 4 h. After washing three times with PBS, DAPI was used for nucleus  
526 staining.

527

## 528 Transmission electron microscope (TEM)

529 For transmission electron microscopy, E14 mES cells cultured in one 10 cm dish were  
530 collected, cleaned from feeder cells, and supplemented with 2.5% glutaraldehyde. The  
531 cell pellet was dispersed into small clusters and fixed at least 6 hr at 4 °C. After that,  
532 the cell samples were treated with standard procedures. Then the slices were imaged  
533 on FEI Spirit 120 kV LaB6 Routine Cryo-EM Capable Electron Microscope.

534

## 535 Embryo collection and culture

536 The C57BL/6J mice were housed in the animal facility of Zhejiang University. All  
537 experimental procedures were performed in accordance with the Animal Research  
538 Committee guidelines of Zhejiang University. To collect pre-implantation embryos,  
539 C57BL/6J female mice (4–6 weeks old) were intraperitoneally injected with 7.5 IU each  
540 of PMSG (San-Sheng Pharmaceutical) for 48h followed by injection of 7.5 IU of hCG  
541 (San-Sheng Pharmaceutical). The superovulated female mice were mated with adult  
542 males overnight after hCG administration. Embryos at different stages of pre-  
543 implantation development were collected at defined time periods after the  
544 administration of hCG: 30 h (early 2-cell), 44–48 h (2-cell), 54–56 h (4-cell), 68–70 h (8-  
545 cell), 76-78 h (morula) and 92–94 h (blastocysts) in HEPES-buffered CZB medium.  
546 Zygotes were collected from ampullae of oviducts and released with hyaluronidase for  
547 removing cumulus cells.

548

## 549 Embryo immunofluorescence staining

550 Embryos were first fixed with 1% and 2% paraformaldehyde (PFA) in 1×PBS for 3 min  
551 sequentially, followed by treatment with 4% PFA for 30 min at room temperature (RT).  
552 Embryos were washed three times with 1×PBS, permeabilized for 15 minutes in PBS/

553 0.25% Triton X-100 and blocked-in blocking buffer (PBS/0.2% BSA/0.01% Tween-20)  
554 for 1 hr at RT, followed by incubation overnight with primary antibodies (1:200,  
555 Nucleolin, CST, 145745; 1:400, NPM1, Sigma, B0556; 1:200, Fibrillarin, Abcam, ab4566;  
556 RPA194, 1:50, Santa Cruz, sc-48385) at 4 degree or for 1hr at 37 °C. Subsequently,  
557 embryos were washed four times for 10 min each and incubated with a secondary  
558 antibody (daylight 488-conjugated anti-rabbit, 1:100 or daylight 594-conjugated anti-  
559 mouse, 1:200) for 1hr at 37°C and washed three times with PBS. Nuclei were stained  
560 with DAPI for 1 min. Embryos were observed under Zeiss LSM880 fluorescence  
561 microscope at 63× magnification with an oil immersion objective.

562

### 563 Embryo collection, cDNA synthesis and qRT-PCR

564 10 embryos were rinsed in 0.2% BSA/PBS without Ca<sup>2+</sup> and Mg<sup>2+</sup> and placed in 0.2 ml  
565 PCR tube, immediately transferred in liquid nitrogen, and stored at -80 °C. It was  
566 hybridized with 0.5 µl oligo-dT30 (10 µM, Takara) and 1 µl random (1 M) and 1 µl dNTP  
567 mix (10 mM) in 2 µl cell lysis buffer (2 U RNase inhibitor, 0.01% Triton X-100) at 72 °C  
568 for 3 min. Then, the reaction was immediately quenched on ice. After the reaction  
569 tube was centrifuged, 2 µl was used for reverse transcription with Super Script II  
570 Reverse Transcriptase 5x first strand buffer, 0.25 µl RNase inhibitor (40 U), 0.06 µl  
571 MgCl<sub>2</sub> (1 M), 2 µl betaine (5 M), and 0.5 µl Reverse Transcriptase Superscript II (Takara).  
572 Reverse transcription was carried out in the thermocycler at 42 °C for 90 min, 70 °C for  
573 15 min, and then 4 °C for holding. Subsequently, cDNA was diluted 1:10 (v/v) with  
574 RNase free water and used for a qPCR amplification in triplicate with SYBR Green  
575 Master (Vazyme) in a final volume of 20 µl per reaction as manufacturer's instructions.

576

### 577 Embryo RNA-seq library preparation and sequencing.

578 Embryos were collected (5 embryos per sample) in 0.2 ml PCR tubes with a micro-  
579 capillary pipette and processed into cDNA with Superscript II reverse transcriptase. The  
580 cDNA is amplified with KAPA Hifi HotStart using 12 cycles. Sequencing libraries were  
581 constructed from 1 ng of pre-amplified cDNA using DNA library preparation kit

582 (TruePrep DNA Library Prep Kit V2 for Illumina, Vazyme). Libraries were sequenced on  
583 a HiSeq-PE150, with paired end reads of 150 bp length each.

584

### 585 Bulk RNA-seq library preparation and sequencing

586 A total amount of 2 µg RNA per sample was used as input materials for the RNA sample  
587 preparation. mRNA was purified from total RNA using poly-T oligo-attached magnetic  
588 beads. Purified mRNA was fragmented at 94 °C for 15 min by using divalent cations  
589 under elevated temperature in NEBNext first strand synthesis reaction buffer (5X). First  
590 strand cDNA was synthesized using random primer and ProtoScript II reverse  
591 transcriptase in a preheated thermal cycler as follows: 10 min at 25 °C; 15 min at 42 °C;  
592 15 min at 70 °C. Immediately finished, second strand synthesis reaction was performed  
593 by using second strand synthesis reaction buffer (10X) and enzyme mix at 16 °C for 1  
594 hr. The library fragments were purified with QiaQuick PCR kits and elution with EB  
595 buffer, then terminal repair, A-tailing and adapter added were implemented. The  
596 products were retrieved, and PCR was performed for library enrichment. The libraries  
597 were sequenced on an Illumina platform.

598

### 599 10X single-cell mRNA library preparation and sequencing

600 Single-cell suspensions of control and CX-5461 treated mES cells were resuspended in  
601 DPBS-0.04% BSA at 1x10<sup>6</sup> cells/mL. Then scRNA-seq libraries were generated from the  
602 10X Single Cell 3' Solution Reagents V2 according to the manufacturer's protocol (10x  
603 Genomics). After the GEM-RT incubation, barcoded-cDNA was purified with  
604 DynaBeads cleanup mix, followed by 10-cycles of PCR amplification (98°C for 3 min;  
605 [98°C for 15 s, 67°C for 20 s, 72°C for 1 min] x 10; 72°C for 1 min). The total cDNA of  
606 single-cell transcriptomes was fragmented, double-size selected with SPRI beads  
607 (Beckman), followed by 12 cycles sample index PCR amplification (98°C for 45 s; [98°C  
608 for 20 s, 54°C for 30 s, 72°C for 1 min] x 10; 72°C for 1 min), then another double-size  
609 selection with SPRI beads was performed before sequencing. Libraries were  
610 sequenced on the Illumina HiSeq X10 platform according to the manufacturer's

611 instructions (Illumina). Read 1 and Read 2 (paired end) were 150 bp, and the length of  
612 index primer was designed as 8 bp.

613

#### 614 **ChIP-seq library preparation and sequencing**

615 mES cells were cross-linked in 1% formaldehyde for 10 min at 37 °C, followed by adding  
616 glycine to a final concentration of 125 mM and incubated for 5 min at room  
617 temperature. Spin the cells for 5 min at 4 °C, 1100 rpm, and wash twice in ice-cold PBS.  
618 Cell pellet was resuspended with lysis buffer containing 1× Protease Inhibitor Cocktail  
619 and incubated on ice for 10 min, then vortexed vigorously for 10 seconds and  
620 centrifuged at 3000 rpm for 5 minutes. The pellet was re-suspended in ChIP lysis buffer  
621 and incubated on ice for 10 minutes and vortexed occasionally. Afterwards, the  
622 chromatin lysate was transferred to a 1.5 ml centrifuge tube and chromatin sheared  
623 using water bath sonication with the following conditions: shear 15 cycles at 4 °C, 15  
624 seconds on, 30 seconds off. Centrifuge and transfer supernatant to a new tube. Taking  
625 5 µl (1%) from the 500 µl containing sheared chromatin as input. Each chromatin  
626 sample was incubated with antibodies for H3K9me3 Rabbit polyclonal antibody  
627 (abcam, ab8898), H3K27me3 Rabbit mAb (CST, 9733), H3K4me3 Rabbit mAb (CST,  
628 9751), H3K27ac Rabbit mAb (CST, 8173), Nucleolin (D4C7O) Rabbit (CST, 14574),  
629 TRIM28 Mouse monoclonal (20C1) (abcam, ab22553) overnight on a rotating platform  
630 at 4 °C. The next day, the sample was incubated with protein A+G magnetic beads (HY-  
631 K0202, MCE) for 3 hr at 4 °C with rotation. The beads-antibody/chromatin complex  
632 was washed three times with low-salt wash buffer and once with high-salt wash buffer  
633 and resuspended with elution buffer. The elute DNA was treated with RNase A at 42 °C  
634 for 30 min, then treated with protease K at 60 °C for 45 min followed by heat  
635 inactivation at 95 °C for 15 min. The purified DNA was subjected to library preparation  
636 or analyzed by qPCR. The libraries were sequenced on an Illumina platform.

637

#### 638 ***In situ* Hi-C library preparation and sequencing**

639 10<sup>6</sup> cells were cross-linked for 10 min with 1% final concentration fresh formaldehyde

640 and quenched with 0.2M final concentration glycine for 5 min. The cross-linked cells  
641 were subsequently lysed in lysis buffer (10 mM Tris-HCl (pH 8.0), 10 mM NaCl, 0.2%  
642 NP40, and complete protease inhibitors (Roche)). The extracted nuclei were re-  
643 suspended with 150  $\mu$ l 0.1% SDS and incubated at 65°C for 10 min, then SDS molecules  
644 were quenched by adding 120  $\mu$ l water and 30  $\mu$ l 10% Triton X-100, and incubated at  
645 37 °C for 15 min. The DNA in the nuclei was digested by adding 30  $\mu$ l 10x NEB buffer  
646 2.1 (50 mM NaCl, 10 mM Tris-HCl, 10 mM MgCl<sub>2</sub>, 100  $\mu$ g/ml BSA, pH 7.9) and 150U of  
647 Mbol, and incubated at 37 °C overnight. On the next day, the Mbol enzyme was  
648 inactivated at 65 °C for 20 min. Next, the cohesive ends were filled in by adding 1  $\mu$ l of  
649 10 mM dTTP, 1 $\mu$ l of 10 mM dATP, 1  $\mu$ l of 10 mM dGTP, 2  $\mu$ l of 5mM biotin-14-dCTP, 14  
650  $\mu$ l water and 4  $\mu$ l (40 U) Klenow, and incubated at 37 °C for 2 h. Subsequently, 663  $\mu$ l  
651 water, 120  $\mu$ l 10x blunt-end ligation buffer (300 mM Tris-HCl, 100 mM MgCl<sub>2</sub>, 100 mM  
652 DTT, 1 mM ATP, pH 7.8), 100 $\mu$ l 10% Triton X-100 and 20 U T4 DNA ligase were added  
653 to start proximity ligation. The ligation reaction was placed at 16 °C for 4 h. After  
654 ligation, the cross-linking was reversed by 200  $\mu$ g/mL proteinase K (Thermo) at 65°C  
655 overnight. DNA purification was achieved through QIAamp DNA Mini Kit (Qiagen)  
656 according to manufacturer's instructions. Purified DNA was sheared to a length of  
657 ~400 bp. Point ligation junctions were pulled down by Dynabeads® MyOne™  
658 Streptavidin C1 (ThermoFisher) according to manufacturer's instructions. The Hi-C  
659 library for Illumina sequencing was prepped by NEBNext® Ultra™ II DNA library Prep  
660 Kit for Illumina (NEB) according to manufacturer's instructions. The final library was  
661 sequenced on the Illumina HiSeq X Ten platform (San Diego, CA, United States) with  
662 150PEmode. Two replicates were generated for one group material.

663

#### 664 Bulk RNA-seq data analysis

665 All bulk RNA-seq reads were trimmed using Trimmomatic software (Version 0.36) with  
666 the following settings "ILLUMINACLIP:TruSeq3-PE.fa:2:30:10 LEADING:3 TRAILING:3  
667 SLIDINGWINDOW:4:15 MINLEN:36"<sup>75</sup> and were further quality-filtered using FASTX  
668 Toolkit ([http://hannonlab.cshl.edu/fastx\\_toolkit/](http://hannonlab.cshl.edu/fastx_toolkit/)) fastq\_quality\_trimmer command

669 with the minimum quality score 20 and minimum percent of 80% bases that has a  
670 quality score larger than this cutoff value. The high-quality reads were mapped to the  
671 mm10 genome by HISAT2, a fast and sensitive spliced alignment program for mapping  
672 RNA-seq reads, with -dta parameter<sup>76</sup>. PCR duplicate reads were removed using Picard  
673 tools (<https://broadinstitute.github.io/picard/>). For subsequent analysis on single-  
674 copy genes, only uniquely mapped reads were kept. Considering the multi-mapping of  
675 reads derived from repeat sequences, we used all mapped reads for further analysis.  
676 The expression levels of genes and repeat sequences were independently calculated  
677 by StringTie<sup>77</sup> (Version v1.3.4d) with -e -B -G parameters using Release M18  
678 (GRCm38.p6) gene annotations downloaded from GENCODE data portal and  
679 annotated repeats (RepeatMasker) downloaded from the UCSC genome browser,  
680 respectively. To obtain reliable and cross-sample comparable expression abundance  
681 estimation for each gene and each family of repeat sequence, reads mapped to mm10  
682 were counted as TPM (Transcripts Per Million reads) based on their genome locations.  
683 Differential expression analysis of genes in different samples was performed by  
684 DESeq2 using the reads count matrix produced from a python script “prepDE.py”  
685 provided in StringTie website (<http://ccb.jhu.edu/software/stringtie/>). We selected  
686 the genes with stage-specific scores larger than 0.2 to perform K-mean clustering  
687 analysis using pheatmap R package. The stage-specific scores of genes expressed  
688 during mouse early embryo development were obtained by entropy-based measure  
689 <sup>78</sup>.

690 Unsupervised hierarchical clustering was carried out to compare the transcriptomes  
691 of mES cells from our study and other reports of 2C-like cell (2C::*tdTomato*+ and  
692 2C::*tdTomato*-(GEO accession GSE33923); Zscan4\_Em+ and Zscan4\_Em- (GEO  
693 accession GSE51682); Kap1\_KO and Kap1\_WT (GEO accession GSE74278); CAF1\_KO  
694 and CAF1\_WT (GEO accession GSE85632), Dux\_GFPpos and Dux\_GFPneg (GEO  
695 accession GSE85632); LINE1 ASO and RC ASO (GEO accession GSE100939);  
696 Dppa4\_GFPpos and Dppa4\_GFPneg (GEO accession GSE120953), NELFA\_GFPpos and  
697 NELFA\_GFPneg (GEO accession GSE113671); Lin28a\_KO and Lin28a\_WT (GEO



698 accession GSE164420). Additionally, pre-implantation mouse embryos of different  
699 developmental stages (GSE66582) were included for comparison. TPM were obtained  
700 for each sample using the StringTie described above. Only genes that were expressed  
701  $\text{TPM} \geq 1$  were included for analysis. A log<sub>2</sub> transformation was applied after adding  
702 one pseudo-count (that is,  $\log_2[\text{TPM}+1]$ ). The ComBat function from the sva package  
703 (<https://bioconductor.org/packages/release/bioc/html/sva.html>) was applied on log<sub>2</sub>  
704 expression values to correct for batch effects caused by different experiments and  
705 sequencing platforms.

706

### 707 Single-cell RNA-seq data analysis

708 For single cell RNA-seq, we used 10x Genomics system following the manufacturer's  
709 protocol. We followed the previously published pipeline<sup>79</sup> to produce digital gene  
710 expression matrices of the droplet microfluidics-based single-cell RNA-seq sequencing  
711 data derived from control and CX-5461 treated mouse ES cells. Single-cell gene  
712 expression matrix was further analyzed with Seurat (<https://satijalab.org/seurat/>)  
713 (v2.3.4). We excluded the genes with expressed cell number smaller than 3 and the  
714 cells with nUMIs smaller than 500 or the expression percentages of mitochondrial  
715 genes larger than 0.2 and used 16 Principle Components (PCs) for tSNE analysis.  
716 Especially, we modified the published pipeline by substituting the aligner of Bowtie  
717 with HISAT2 for calculating the expression of repeat sequences. Considering the multi-  
718 mapping of reads derived from repeat sequences, we used all mapped reads for  
719 further analysis.

720

### 721 CHIP-seq and ATAC-seq data analysis

722 To tailor and filter ATAC-seq and CHIP-seq reads, we used the same procedure as RNA-  
723 seq reads processing. To avoid the potential effects of inconsistent sequencing depths  
724 on subsequent data analyses, we randomly sampled equal numbers read pairs from  
725 each experimental sample. For each sample, the ATAC-seq and CHIP-seq reads were  
726 first aligned to mm10 genomes using Bowtie2 (version 2.3.4.1)<sup>80</sup>. The ATAC-seq reads

727 were aligned with the parameters: -t -q -N 1 -L 25 -X 2000 no-mixed no-discordant. The  
728 ChIP-seq reads were aligned to mm10 with the options: -t -q -N 1 -L 25. The ATAC-seq  
729 reads were aligned with the parameters: -t -q -N 1 -L 25 -X 2000 no-mixed no-  
730 discordant. The ChIP-seq reads were aligned to mm10 with the options: -t -q -N 1 -L  
731 25. For meta-analysis of genome regions, all unmapped reads, multiple mapped reads,  
732 and PCR duplicates were removed. For demonstrating the sequencing signal around  
733 Dux locus in UCSC genome browser, we maintained all multiple mapped reads for  
734 visualization. The bamCoverage and bamCompare commands contained in deepTools  
735 <sup>81</sup> (version 2.5.3) were adopted for downstream analysis. Using BamCoverage  
736 command with the parameters: -normalizeUsing BPM -of bigwig -binSize 100, we  
737 normalized the raw reads signal to Bins Per Million mapped reads (BPM) signal and  
738 converted the alignment bam files to bigwig signal files. The bigwig files were imported  
739 into UCSC genome browser for visualization. To minimize the effect of chromatin  
740 structure and sequencing bias in our ChIP-seq data, we corrected ChIP-seq signal using  
741 log<sub>2</sub> ratio transformation between H3K9me3 signal and input signal by BamCompare  
742 command. We only considered the log<sub>2</sub> ratio larger than 0 as effective ChIP-seq signals.  
743 The “computeMatrix” and “plotProfile” commands of deepTools were used to produce  
744 the reads density distribution plot of ATAC-seq and ChIP-seq signal in the given  
745 genomic region. For meta-analysis of sequencing signals in L1 regions, we only used  
746 their subsets which have overlaps with Inactive Hub regions. Homer (v4.11)<sup>82</sup> was used  
747 for motif discovery and enrichment analysis. For motifs across gene promoters, the  
748 search space was defined as a 4 kilobase (kb) window centered at the transcription  
749 start site (findMotifs.pl geneInput.txt mouse out/ -start -2000 -end 2000 -len 8,12 -p  
750 4).

751

## 752 Hi-C data analysis

753 The paired-end reads of fastq files were aligned, processed, and iteratively corrected  
754 using HiC-Pro (version 2.11.1) as previously described<sup>83</sup>. Briefly, short sequencing  
755 reads were first independently mapped to mouse mm10 reference genome using the

756 bowtie2 aligner with end-to-end algorithm and ‘-very-sensitive’ option. To rescue the  
757 chimeric fragments spanning the ligation junction, the ligation site was detected and  
758 the 5’ fraction of the reads was aligned back to the reference genome. Unmapped  
759 reads, multiple mapped reads and singletons were then discarded. Pairs of aligned  
760 reads were then assigned to MboI restriction fragments. Read pairs from the uncut  
761 DNA, self-circle ligation and PCR artifacts were filtered out and the valid read pairs  
762 involving two different restriction fragments were used to build the contact matrix. To  
763 eliminate the possible effects on data analyses of variable sequencing depths, we  
764 randomly sampled equal numbers read pairs from each condition for downstream  
765 analyses involving comparison analyses between conditions. Valid read pairs were  
766 then binned at a 40kb, 150kb and 500 kb resolutions by dividing the genome into bins  
767 of equal size. The binned interaction matrices were then corrected by Knight–Ruiz  
768 matrix balancing method using hicCorrectMatrix command with the parameter --  
769 correctionMethod KR in HiCExplorer (<https://hicexplorer.readthedocs.io/en/latest/>)  
770 (v3.3)<sup>85</sup>. The Observed/Expected (O/E) Hi-C contact matrix was produced by  
771 HiCExplorer hicTransform command with --method obs\_exp\_norm option. Pearson  
772 Correlation Coefficients Hi-C matrix was obtained by HiCExplorer hicTransform  
773 command with --method pearson option.

774 A and B compartments were identified using the first eigenvector (PC1) from principal  
775 component analysis on correlation Hi-C matrix as described previously<sup>85</sup> with minor  
776 modifications. We used HOMER software with parameters ‘-res 500000 -window  
777 1000000’ to obtain the PC1 value based on Pearson Correlation Coefficients (PCC) Hi-  
778 C matrix. Sometimes the entry signs of PC1 need to be inverted to ensure that we are  
779 assigning the correct signs to individual regions. As GC content is well correlated with  
780 A and B compartments<sup>86</sup>, we calculated the GC content of each region and inverted  
781 the eigenvector sign if the average GC content of negative-eigenvector entries is higher  
782 than that of positive-eigenvector entries. To obtain the heatmap plot of enrichment of  
783 A/B interaction, an A/B compartment profile for each chromosome was then  
784 separated into 5 bins: (min to 20th percentile), (20th percentile to 40th percentile),

785 etc. For each pair of bins (25 pairs total), the averaged “O/E” values were then  
786 calculated for loci belonging to each pair of bins. The compartment strength was then  
787 calculated as  $(AA+BB)/AB^2$  as done previously<sup>87</sup>. For the error bar in evaluating the  
788 compartment strength, we obtained 100 5x5 compartment enrichment matrices by  
789 bootstrapping. For each pixel of the 5x5 compartment enrichment map, we took all  
790 the O/E values that contributed to this pixel and took a random sample with  
791 replacement of the same size that the contributing values. We then proceeded with  
792 downstream for each of the 100 reshuffled maps.

793 TADs and loops annotated in CH12.LX were obtained from<sup>59</sup> and lifted over to the  
794 mm10 genome version using the UCSC genome browser liftOver tool. Aggregated plots  
795 of TAD enrichment map were obtained by averaging O/E values over annotated TAD  
796 positions at 40kb resolution as previously described<sup>87</sup>. For each domain of length  $L$ , a  
797 map for the region  $((Start - L) \text{ to } (End + L))$  was obtained; this produced a contact that  
798 is three times bigger than a given domain. This contact map was then rescaled to a  
799  $(90 \times 90)$  pixel map using linear interpolation and block-averaging. In the resulting map,  
800 the mid-region pixels 30 to 60 correspond to the TAD body. TAD strength for boxplots  
801 was quantified as the ratio of two numbers. The first number is the within-TAD  
802 intensity: the sum of the central square of the enrichment map, rows 30 to 59 and  
803 columns 30 to 59. The second number is the between-TAD intensity,  $\frac{1}{2}$  of the sums of  
804 the regions  $[0:30, 30:60]$  and  $[30:60, 60:90]$ . Aggregated plots of loop enrichment map  
805 were obtained by averaging O/E values around loop anchors of 310kb window at 10kb  
806 resolution. Loop strength was calculated as previous described<sup>87</sup>.

807 Hi-C “de novo boundary” aggregate plots at MERVLs are centered on 5’ to 3’-oriented  
808 MERVL and show a window of 2mb around the MERVL element at 40kb resolution. For  
809 illustrating the change of insulation around MERVL genes, the  $\log_2$  transformed Hi-C  
810 O/E matrix was further scaled by z-score normalization across each row. We calculated  
811 the insulation score as originally defined<sup>60</sup> with minor modifications. Briefly, for each  
812 region  $i$  in the genome, we calculated the average number of O/E interactions in 40kb  
813 Hi-C matrix in a quadratic window with the lower left corner at  $(i-1, i+1)$ , and the top

814 right corner at (i-5, i+5), where 5 is the window size in bins. We normalized insulation  
815 scores by dividing each region's score by the average scores of the nearest 50 regions,  
816 and log<sub>2</sub>-transforming the resulting vector, thus accounting for local biases in  
817 insulation score. Visualization of Hi-C matrix was carried out by Juicer tool  
818 (<https://github.com/aidenlab/juicer>)<sup>88</sup> and R software (<https://www.r-project.org/>).  
819 For heatmap visualization in Juicer, we converted valid read pairs into .hic format files  
820 with the juicer tool pre command.

821

## 822 **Statistical analysis**

823 All statistical analyses for Next Generation Sequencing (NGS) data were performed  
824 with R/Bioconductor software utilizing custom R scripts. The other statistical analyses  
825 were performed with GraphPad Prism software. Details of individual tests are outlined  
826 within each figure legend, including number of replications performed (n) and the  
827 reported error as standard error of the mean (s.e.m). All statistics are \* p < 0.05, \*\* p  
828 < 0.01, \*\*\* p < 0.001, and were calculated by Wilcox signed rank test (for paired  
829 samples), Mann-Whitney U test (for independent samples), two-way ANOVA as  
830 described in the figure legends.

831

## 832 **Code availability**

833 All the analysis in this study was made based on custom perl and R codes and can be  
834 available upon reasonable request.

835

## 836 **Data availability**

837 All the bulk RNA-seq, single-cell RNA-seq, ChIP-seq, ATAC-seq and Hi-C data generated  
838 in this study have been deposited in the National Center for Biotechnology Information  
839 Gene Expression Omnibus (GEO) database under the accession number of GSE166041.  
840 Previously published RNA-Seq data that were re-analyzed here are available under  
841 accession codes GSE33923, GSE51682, GSE74278, GSE85632, GSE100939, GSE120953,  
842 GSE113671, GSE97778 and GSE66582. Published ChIP-Seq data for DUX are available

843 under accession code GSE85632. Published ChIP-Seq data for p53 are available under  
844 accession code GSE26360. Published ATAC-seq data are available under accession code  
845 (GSE66390 and GSE85632). Published Hi-C data of mouse pre-implantation embryos  
846 are available under accession code GSE82185. Published Hi-C data of lymphoblastoid  
847 cells are available under accession code GSE63525. Supplementary Table 5 provided a  
848 summary for all analyzed NGS datasets used in this study. All other data supporting  
849 the findings of this study are available from the corresponding author on reasonable  
850 request.

851

## 852 **Acknowledgements**

853 We thank Dr. Xiong Ji for providing the Pol I degraded mES cell lines. We thank Dr.  
854 Pengxu Qian for providing the snoRNA KO cell lines. We thank Dr. Todd Macfarlan for  
855 kind discussion. J.Z. is supported by the National Key Research and Development  
856 Program of China (No. 2018YFA0107100, No. 2018YFA0107103, No. 2018YFC1005002),  
857 the National Natural Science Foundation projects of China (No. 31871453, No.  
858 91857116) and the Zhejiang Natural Science Foundation projects of China (No.  
859 LR19C120001). H.Y. is supported by the Zhejiang Natural Science Foundation projects  
860 of China (No. LQ21C120002).

861

## 862 **Author contributions**

863 J.Z. and H.Y. conceived and designed the study and experiments. H.Y. and J.Z. wrote the  
864 manuscript with contributions from all authors. H.Y. designed and performed all  
865 computational analysis. Z.S., T.T., H.P., A.L., Y.Z., L.C. and L.Z. performed the molecular  
866 experiments in mES cells. J.Z., L.Z. and J.C. performed the experiments in mouse  
867 embryos. H.Y. and Y.X. assisted with the experiment sample preparation. M.C., S.G. and  
868 G.D provided computational support and gave critical suggestions about the study  
869 design and paper writing. All authors analyzed the results and approved the final  
870 version of the manuscript.

871

872 **Additional information**

873 **Competing interests:** The authors declare no competing interests.

874

875 **Figure Legends**

876 **Fig.1: Inhibition of rRNA biogenesis activated 2C-like transcriptional program and**

877 **induced an expanded 2C-like cell population in mES cells. a)** Volcano plots of RNA-

878 sequencing data comparing gene expression of control and cellular stress inducer-

879 treated mES cells (GEO accession GSE166041). **b)** UCSC Genome Browser viewing of

880 RNA-sequencing results at the *Dux* locus (GEO accession GSE166041). **c)** MA plots of

881 RNA-sequencing data comparing repeat sequence expression of control and cellular

882 stress inducer-treated mES cells (GEO accession GSE166041). **d)** Violin plots

883 demonstrating the expressional changes of stage-specific gene clusters of mouse pre-

884 implantation embryos under different types of cellular stress treatment; \*\*:  $p < 0.01$ ,

885 \*\*\*:  $p < 0.001$ , Mann-Whitney U test (GEO accession GSE166041). **e)** Hierarchical

886 clustering of transcriptomes from our study, published 2C-like cell model studies and

887 pre-implantation mouse embryos; Control, CX-5461, Rotenone and Rapamycin (GEO

888 accession GSE166041), 2C::tdTomato+ and 2C::tdTomato- (GEO accession GSE33923);

889 Zscan4\_Em+ and Zscan4\_Em- (GEO accession GSE51682); Kap1\_KO and Kap1\_WT

890 (GEO accession GSE74278); CAF1\_WT and CAF1\_KO (GEO accession GSE85632),

891 Dux\_GFPpos and Dux\_GFPneg (GEO accession GSE85632); LINE1 ASO and RC ASO

892 (GEO accession GSE100939); Dppa4\_GFPpos and Dppa4\_GFPneg (GEO accession

893 GSE120953), NELFA\_GFPpos and NELFA\_GFPneg (GEO accession GSE113671);

894 Lin28a\_KO and Lin28a\_WT (GEO accession GSE164420); MII-Oocyte, Zygote, Early 2-

895 cell, 2-cell, 4-cell, 8-cell, ICM and mES cells (GEO accession GSE66390). **f)** tSNE feature

896 plots demonstrating the averaged expression levels of *MERVL* genes in 2981 control

897 mES cells and 3219 CX-5461-treated mES cells. **g)** tSNE feature plots demonstrating the

898 averaged expression levels of ribosome genes in 2981 control mES cells and 3219 CX-

899 5461-treated mES cells. **h)** tSNE feature plots demonstrating the averaged expression

900 levels of ribosome biogenesis genes in 2981 control mES cells and 3219 CX-5461-

901 treated mES cells (GEO accession GSE166041). **i)** Scatter plots demonstrating negative  
902 correlation of expression level between *MERV1/MERV1-int/MT2\_Mm* and ribosome  
903 genes; Each dot represents a single cell with detectable ERV expression; *r* denotes  
904 correlation coefficient; *p*-value was obtained by *cor.test* function in R software (GEO  
905 accession GSE166041). **j)** FACS analysis on 2C::tdTomato+ mES cells upon different  
906 treatment doses of CX-5461, showing the change of percentage of 2C-like cells. **k)** FACS  
907 analysis on 2C::tdTomato+ mES cells after 12 hour treatment and 24 hour withdrawal  
908 of CX-5461, showing the change of percentage of 2C-like cells.

909 **Fig.2: Deficiency of rRNA biogenesis disrupted normal nucleolar LLPS and epigenetic**  
910 **state of PNH region. a)** CX-5461 treatment causes abnormal nucleolar structure with  
911 electron microscopy. **b)** Immunofluorescence staining of NCL in control mES cells and  
912 CX-5461-treated mES cells. **c)** Immunofluorescence staining of NPM1 in control mES  
913 cells and CX-5461-treated mES cells. **d)** Immunofluorescence staining of FBL in control  
914 mES cells and CX-5461 treated mES cells. **e)** Immunofluorescence staining of RPA194  
915 in control and CX-5461 treated mES cells. **f)** FRAP analysis showing CX-5461 treatment  
916 causes accelerated recovery after photobleaching of NCL. Shown images are  
917 representative of 4 times of experiments. **g)** FRAP analysis showing CX-5461 treatment  
918 causes accelerated recovery after photobleaching of NPM1. Shown images are  
919 representative of 4 times of experiments. **h)** FRAP analysis showing CX-5461 treatment  
920 causes accelerated recovery after photobleaching of FBL. Shown images are  
921 representative of 4 times of experiments. **i)** Heatmap plots demonstrate the levels of  
922 H3K9me3 and H3K27me3 on within 1mb region around start and end sites of Inactive  
923 Hub. The regions of different lengths of Inactive Hub fragments were fitted to 1mb  
924 (GEO accession GSE166041). **j)** Heatmap plots demonstrate the levels of H3K9me3 and  
925 H3K27me3 within 1mb region around start and end sites of NAD. The regions of  
926 different lengths of NAD fragments were fitted to 1mb (GEO accession GSE166041). **k)**  
927 Heatmap plots demonstrate the levels of H3K9me3 and H3K27me3 within 1kb region  
928 around start and end sites of L1 (GEO accession GSE166041). The regions of different  
929 lengths of L1 sequences were fitted to 1kb. **l)** Heatmap plots demonstrate the level of



930 H3K4me3 and H3K27ac within 1mb region around start and end sites of Inactive Hub  
931 (GEO accession GSE166041). The regions of different lengths of Inactive Hub fragments  
932 were fitted to 1mb. **m)** Heatmap plots demonstrate the levels of H3K4me3 and  
933 H3K27ac within 1mb region around start and end sites of NAD. The regions of different  
934 lengths of NAD fragments were fitted to 1mb (GEO accession GSE166041). **n)** Heatmap  
935 plots demonstrate the level of H3K4me3 and H3K27ac on within 1kb region around  
936 start and end sites of L1 (GEO accession GSE166041). The regions of different lengths  
937 of L1 sequences were fitted to 1kb. **o)** Heatmap plots demonstrate the level of NCL  
938 and TRIM28 within 1mb region around start and end sites of Inactive Hub (GEO  
939 accession GSE166041). The regions of different lengths of Inactive Hub fragments were  
940 fitted to 1mb. **p)** Heatmap plots demonstrate the levels of NCL and TRIM28 within 1mb  
941 region around start and end sites of NAD. The regions of different lengths of NAD  
942 fragments were fitted to 1mb (GEO accession GSE166041). **q)** Heatmap plots  
943 demonstrate the level of NCL and TRIM28 within 1kb region around start and end sites  
944 of L1 (GEO accession GSE166041). The regions of different lengths of L1 sequences  
945 were fitted to 1kb.

946 **Fig.3: 2C/ERV genes were activated through the Dux.** **a)** Enriched binding motifs of  
947 5258 genes induced by CX-5461 treatment. **b)** Venn diagrams showing the overlap  
948 among CX-5461 treatment induced genes, p53 activated direct target genes and *Dux*-  
949 overexpression induced genes. **c)** Heatmap plots demonstrate the binding of p53 and  
950 *Dux* proteins on within 5kb region around transcription start sites of 5258 CX-5461  
951 induced genes using published p53 ChIP-seq data and *Dux* ChIP-seq data (GEO  
952 accession GSE26360 for p53 and GEO accession GSE85632 for *Dux*). **d)** Line plots  
953 demonstrate the meta-analysis results of p53 and *Dux* protein on within 5kb region  
954 around transcription start sites of 621 commonly induced genes between CX-5461  
955 treatment and *Dux* overexpression and 4637 specifically induced genes by CX-5461  
956 using published p53 ChIP-seq data and *Dux* ChIP-seq data (GEO accession GSE26360  
957 for p53 and GEO accession GSE85632 for *Dux*). **e)** Line plots demonstrate the meta-  
958 analysis results of p53 and *Dux* protein on within 5kb region around transcription start

959 and end sites of 10173 CX-5461 induced ERV genes using published p53 ChIP-seq data  
960 and Dux ChIP-seq data. The regions of different lengths of gene body were fitted to  
961 5kb (GEO accession GSE26360 for p53 and GEO accession GSE85632 for Dux). **f)**  
962 Heatmap plots demonstrate the binding of p53 and Dux proteins on within 5kb region  
963 around transcription start and end sites of 5258 CX-5461 induced *MERVL-int* and  
964 *MT2\_Mm* genes; The regions of different lengths of gene body were fitted to 5kb (GEO  
965 accession GSE26360 for p53 and GEO accession GSE85632 for Dux). **g)** qRT-PCR  
966 showing the expression of *Dux* or 2C-related genes in *Dux* silenced mES cells; \*\*:  
967  $p < 0.01$ , \*\*\*:  $p < 0.001$ , two-way ANOVA, the replicates of experiment  $n=3$ ; error bar:  
968 standard error of the mean. **h)** ChIP-PCR showing H3K9me3 levels of *Dux* or 2C-related  
969 genes in *Dux* silenced mES cells; \*:  $p < 0.05$ , \*\*:  $p < 0.01$ , \*\*\*:  $p < 0.001$ , two-way ANOVA,  
970 the replicates of experiment  $n=3$ , error bar: standard error of mean. **i)** ChIP-PCR  
971 showing H3K27me3 levels of *Dux* or 2C-related genes in *Dux* silenced mES cells; \*:  
972  $p < 0.05$ , \*\*:  $p < 0.01$ , \*\*\*:  $p < 0.001$ , two-way ANOVA, the replicates of experiment  $n=3$ ,  
973 error bar: standard error of mean. **j)** ChIP-PCR showing DUX protein binding levels on  
974 2C-related genes in *Dux* silenced mES cells; \*:  $p < 0.05$ , \*\*:  $p < 0.01$ , \*\*\*:  $p < 0.001$ , two-  
975 way ANOVA, the replicates of experiment  $n=3$ , error bar: standard error of mean. **k)**  
976 Line plots demonstrate the meta-analysis results of chromatin accessibility in *Dux*  
977 silenced mES cells within 5kb region around transcription start sites or transcription  
978 start and end sites of 621 commonly induced genes between CX-5461 treatment and  
979 *Dux* overexpression and 10173 CX-5461 induced ERV genes using published ATAC-seq  
980 data. The regions of different lengths of ERV genes were fitted to 5kb (GEO accession  
981 GSE166041). p53-ctrl: untreated mES cells, p53-adr: mES cells treated with adriamycin,  
982 a DNA damage agent widely used to activate p53, *Dux* (12h): mES induced with  
983 doxycycline for 12 hours, *Dux* (18h): mES induced with doxycycline for 18 hours.

984 **Fig.4: rRNA biogenesis defect drove 3D chromatin structure reorganization of PNH**  
985 **and *MERVL* regions towards the 2C-like state. a)** Hi-C contact maps of Inactive Hub  
986 and 1.5 Mb genomic regions around *Dux* at 150kb resolution (GEO accession  
987 GSE166041). **b)** Hi-C contact maps of NAD and 1.5 Mb genomic regions around *Dux* at

988 150kb resolution (GEO accession GSE166041). **c)** Hi-C contact maps of L1 and 1.5 Mb  
989 genomic regions around *Dux* at 150kb resolution. The zoomed-in regions aim to  
990 demonstrate the change of Hi-C contacts between *Dux* and chromosome 10 in control  
991 mES cells and CX-5461 treated mES cells (GEO accession GSE166041). **d)** Hi-C pearson  
992 correlation coefficient (PCC) heat maps of Inactive Hub and 1.5Mb genomic regions  
993 around *Dux* at 150kb resolution (GEO accession GSE166041). **e)** Hi-C pearson  
994 correlation heat maps of NAD and 1.5Mb genomic regions around *Dux* at 150kb  
995 resolution (GEO accession GSE166041). **f)** Hi-C pearson correlation heat maps of L1  
996 and 1.5Mb genomic regions around *Dux* at 150kb resolution. The zoomed-in regions  
997 aim to demonstrate the change of Hi-C PCC between *Dux* and chromosome 10 in  
998 control mES cells and CX-5461 treated mES cells (GEO accession GSE166041). **g)** Scatter  
999 plot demonstrates the  $\log_2$ (fold change) of Hi-C contacts between Inactive Hub and  
1000 different types of genes in control and CX-5461 treated mES cells (GEO accession  
1001 GSE166041). **h)** Scatter plot demonstrates the  $\log_2$ (fold change) of Hi-C contacts  
1002 between NAD and different types of genes in control and CX-5461 treated mES cells  
1003 (GEO accession GSE166041). **i)** Scatter plot demonstrates the  $\log_2$ (fold change) of Hi-C  
1004 contacts between L1 and different types of genes in control and CX-5461 treated mES  
1005 cells (GEO accession GSE166041). **j)** Scatter plot demonstrates the PCC difference  
1006 between Inactive Hub and different types of genes in control and CX-5461 treated mES  
1007 cells (GEO accession GSE166041). **k)** Scatter plot demonstrates the PCC difference  
1008 between NAD and different types of genes in control and CX-5461 treated mES cells  
1009 (GEO accession GSE166041). **l)** Scatter plot demonstrates the PCC difference between  
1010 L1 and different types of genes in control and CX-5461 treated mES cells. The  
1011 difference of PCC is defined as the average (PCC) of Inactive Hub regions and different  
1012 types of genes in CX-5461 treated mES cells minus the average PCC of Inactive Hub  
1013 regions and different types of genes in wild type mES cells. PCC: Pearson Correlation  
1014 Coefficient, *MERVL-int*: Up-regulated *MERVL-int* genes, *MT2\_Mm*: Up-regulated  
1015 *MT2\_Mm* genes, UG: Up-regulated genes, DG: Down-regulated genes (GEO accession  
1016 GSE166041). **m)** DNA FISH analysis with a *Dux* locus probe and Inactive Hub locus

1017 probe, and co-immunostained with NCL protein. The percentage of Nucleolus-  
1018 localized (overlapped with NCL) and Nucleoplasm-localized (nonoverlapped with NCL)  
1019 of FISH signals is calculated. \*\*\*:  $p < 0.001$ , two-way ANOVA, error bar: standard error  
1020 of the mean, n denotes the number of observed mES cells (GEO accession GSE166041).  
1021 **n)** Aggregate Observed(O)/Expected(E) Hi-C matrices centered on CX-5461 induced  
1022 *MERVL* genes in control ,CX-5461 treated mES cells (GEO accession GSE166041) and  
1023 lymphoblastoid cells (GEO accession GSE63525) and mouse embryos throughout  
1024 mouse pre-implantation embryonic development (GEO accession GSE82185). **o)**  
1025 Representative 40kb Hi-C O/E interaction matrices of a *MERVL* loci located at TAD  
1026 boundaries (chr7:97,113,503-97,122,376) are shown as heatmaps, along with the  
1027 insulation score and genome browser tracks of RNA-Seq, H3K9me3, H3K27me3,  
1028 H3K4me3 and H3K27ac ChIP-Seq signals of the expanded genomic region containing  
1029 the TAD boundary (arrows) in control and CX-5461 treated mES cells as well as in  
1030 mouse early embryos (GEO accession GSE166041 and GSE82185).

1031 **Fig.5: Genetic interferences of rRNA biogenesis recapitulate CX-5461-induced 2C-like**  
1032 **molecular phenotypes. a)** DNA FISH analysis with a *Dux* locus probe and Inactive Hub  
1033 locus probe, and co-immunostained with NCL protein in control and Pol I degradation  
1034 mES cell lines. **b)** The percentage of Nucleolus-localized (overlapped with NCL) and  
1035 Nucleoplasm-localized (nonoverlapped with NCL) of FISH signals in control and Pol I  
1036 degradation mES cell lines; \*\*:  $p < 0.01$ , \*\*\*:  $p < 0.001$ , two-way ANOVA, error bar:  
1037 standard error of the mean, n denotes the number of observed mES cells. **c)** DNA FISH  
1038 analysis with a *Dux* locus probe and Inactive Hub locus probe, and co-immunostained  
1039 with NCL protein in control and snoRNA knockout mES cell lines. **d)** The percentage of  
1040 Nucleolus-localized (overlapped with NCL) and Nucleoplasm-localized (nonoverlapped  
1041 with NCL) of FISH signals in control and snoRNA knockout mES cell lines; \*:  $p < 0.05$ , \*\*\*:  
1042  $p < 0.001$ , two-way ANOVA, error bar: standard error of the mean, n denotes the  
1043 number of observed mES cells. **e)** FRAP analysis showing Pol I degradation causes  
1044 accelerated recovery after photobleaching of NCL, the replicates of experiment n = 4.  
1045 **f)** FRAP analysis showing Pol I degradation causes accelerated recovery after

1046 photobleaching of NPM1, the replicates of experiment n = 4. **g**) FRAP analysis showing  
1047 snoRNA knockout causes accelerated recovery after photobleaching of NCL, the  
1048 replicates of experiment n = 4. **h**) FRAP analysis showing snoRNA knockout causes  
1049 accelerated recovery after photobleaching of NPM1, the replicates of experiment n =  
1050 4. **i**) qRT-PCR quantification of 2C marker gene expression in control mES cells and Pol  
1051 I degraded mES cell lines; \*\*: p<0.01, \*\*\*: p<0.001, two-way ANOVA, the replicates of  
1052 experiment n=3; error bar: standard error of the mean. **j**) qRT-PCR quantification of 2C  
1053 marker gene expression in control mES cells and snoRNA knockout mES cell lines; \*\*:  
1054 p<0.01, \*\*\*: p<0.001, two-way ANOVA, the replicates of experiment n=3; error bar:  
1055 standard error of the mean. **k**) The percentage of 2C::tdTomato positive cells was  
1056 quantified using FACS analysis in control mES cells and Pol I degraded mES cells; Data  
1057 are means  $\pm$  SD, SD: Standard Deviation, \*\*\*: p<0.001, two-way ANOVA, the replicates  
1058 of experiment n=5. **l**) The percentage of 2C::tdTomato positive cells was quantified  
1059 using FACS analysis in control mES cells and snoRNA knockout mES cells; Data are  
1060 means  $\pm$  SD, SD: Standard Deviation, \*\*: p<0.01, two-way ANOVA, the replicates of  
1061 experiment n=5.

1062 **Fig.6: rRNA biogenesis is critically required at the 2-cell-to-4-cell stage transition**  
1063 **during pre-implantation embryo development. a)** Expression of pre-rRNA and 28S  
1064 rRNA across different embryo developmental stages. **b)** Expression of different subunit  
1065 genes of RNA polymerase I across different embryo developmental stages. **c)** Different  
1066 schemes of treatment with CX-5461. The 24hrs time window for CX-5461 treatment is  
1067 highlighted in red; Dpc: Days post-coitum. **d)** Stacked bar plots showing fraction of  
1068 embryos at different developmental stages with the different CX-5461 treatment  
1069 schemes in Fig 6c. The numbers of embryos of group A to group D were all 15 embryos.  
1070 **e)** qRT-PCR showing rRNA expression level in blastocysts, after CX-5461 treatment of  
1071 morula embryos followed by *in vitro* culture of the treated embryos. \*: p<0.05, \*\*:  
1072 p<0.01, two-way ANOVA, the replicates of experiment n=3. **f)** qRT-PCR showing 2C  
1073 marker gene expression level in blastocysts, after CX-5461 treatment of morula  
1074 embryos followed by *in vitro* culture of the treated embryos. \*\*\*: p<0.001, two-way  
1075 ANOVA, the replicates of experiment n=3. **g)** Violin plots demonstrating the expression

1076 level changes of stage-specific gene clusters of mouse pre-implantation embryos (as  
1077 defined in Extended Data Fig S1) in CX-5461-treated and control blastocyst embryos,  
1078 \*\*\*:  $p < 0.001$ , Mann-Whitney U test (GEO accession GSE166041). **h)** Violin plots show  
1079 expression levels of major ERV gene classes in control blastocyst embryos and CX-5461  
1080 treated blastocyst embryos;  $n$  denotes the number of sub-classes of ERV genes; \*\*\*:  
1081  $p < 0.001$ , Wilcoxon signed rank test (GEO accession GSE166041). **i)** Violin plots show  
1082 expression levels of ERV gene sub-classes of *MERVL-int* and *MT2\_Mm* in control  
1083 blastocyst embryos and CX-5461 treated blastocyst embryos;  $seq\_n$  denotes the  
1084 number of annotated *MERVL-int* and *MT2\_Mm* sequences in the mouse mm10  
1085 reference genome; \*: \*\*\*:  $p < 0.001$ , Wilcoxon signed rank test (GEO accession  
1086 GSE166041). **j)** Violin plots show expression levels of ERV gene sub-classes of  
1087 *GSAT\_MM* in control blastocyst embryos and CX-5461-treated blastocyst embryos;  
1088  $seq\_n$  denotes the number of annotated *GSAT\_MM* sequences in the mouse mm10  
1089 reference genome; \*\*\*:  $p < 0.001$ , Wilcoxon signed rank test (GEO accession GSE166041).

1090 **Fig.7: A mechanistic model for the role of rRNA biogenesis in regulating the 2C-like**  
1091 **program and the homeostasis between 2C-like cells and mES cells.** In the  
1092 unperturbed mES cells, nucleolar integrity mediated by rRNA biogenesis maintains the  
1093 normal the liquid-liquid phase separation (LLPS) of nucleolus and the formation of  
1094 peri-nucleolar heterochromatin (PNH) containing *Dux*, and this normal nucleolar LLPS  
1095 facilitated NCL/TRIM28 complex occupancy on the *Dux* locus to repress *Dux* expression.  
1096 In contrast, in the rRNA biogenesis-inhibited mES cells, the natural liquid-like phase of  
1097 nucleolus is disrupted, causing dissociation of the NCL/TRIM28 complex from the PNH  
1098 and changes of epigenetic state and 3D structure of the PNH, which eventually leads  
1099 to *Dux* to be released from the PNH, activation of 2C-like program and transition of  
1100 mES cells to 2C-like cells.

1101 **Extended Data Fig.S1: Inhibition of rRNA biogenesis activated 2C-like transcriptional**  
1102 **program and induced an expanded 2C-like cell population in mES cells, related to**  
1103 **Fig.1. a)** UCSC Genome Browser viewing of RNA-sequencing results in *Zscan4d* gene  
1104 locus (GEO accession GSE166041). **b)** UCSC Genome Browser viewing of RNA-  
1105 sequencing results in *Gm12794* gene locus (GEO accession GSE166041). **c)** UCSC

1106 Genome Browser viewing of RNA-sequencing results in a representative ERV (*MERVL-*  
1107 *int* and *MT2\_Mm*) gene locus (GEO accession GSE166041). **d)** UCSC Genome Browser  
1108 viewing of RNA-sequencing results in a representative *GSAT\_MM* gene loci (GEO  
1109 accession GSE166041). **e)** Boxplots show the expression levels of major ERV gene  
1110 classes under different types of cellular stress treatment. *n* denotes the number of  
1111 sub-classes of ERV genes, \*\*\*:  $p < 0.001$ , Wilcoxon signed rank test (GEO accession  
1112 GSE166041). **f)** A heatmap plot demonstrating four developmental stage-specific gene  
1113 clusters derived from RNA-seq data of pre-implantation mouse embryos (GEO  
1114 accession GSE97778). **g)** qRT-PCR quantification of rRNA expression in control mES  
1115 cells and CX-5461 treated mES cells, \*\*:  $p < 0.01$ , \*\*\*:  $p < 0.001$ , two-way ANOVA, the  
1116 replicates of experiment  $n=3$ . **h)** Boxplots demonstrating the expression levels of 2C  
1117 marker genes of *Dux*, *Zscan4d* and *Gm12794* in control mES cells and CX-5461 treated  
1118 mES cells; Each point denoted a single cell; The number of parentheses denotes the  
1119 percentage of cells expressing these genes; \*\*\*:  $p < 0.001$ , Wilcoxon signed rank test (GEO  
1120 accession GSE166041). **i)** Boxplots demonstrating the averaged expression levels of  
1121 *MERVL* genes in control mES cells and CX-5461 treated mES cells with single cell RNA-  
1122 sequencing analysis; Each point denoted a single cell; The number of parentheses  
1123 denotes the percentage of cells expressing *MERVL* genes; \*\*\*:  $p < 0.001$ , Wilcoxon signed  
1124 rank test (GEO accession GSE166041). **j)** The expression levels of pluripotency genes  
1125 in control mES cells and CX-5461 treated mES cells; Each point denoted a single cell;  
1126 The number of parentheses denotes the percentage of cells expressing these genes;  
1127 \*\*\*:  $p < 0.001$ , Wilcoxon signed rank test (GEO accession GSE166041). **k)** Scatter plots  
1128 demonstrating negative correlation of expression level between *MERVL/MERVL-*  
1129 *int/MT2\_Mm* and ribosome biogenesis genes; Each dot represents a single cell with  
1130 detectable ERV expression; *r* denotes correlation coefficient; *p*-value was obtained by  
1131 *cor.test* function in R software (GEO accession GSE166041). **l)** The percentage of  
1132 2C::tdTomato positive cells was quantified using FACS analysis in control mES cells and  
1133 CX-5461-treated mES cells; Data are means  $\pm$  SD; SD: Standard Deviation; \*\*:  $p < 0.01$ ,  
1134 \*\*\*:  $p < 0.001$ , two-way ANOVA, the replicates of experiment  $n=5$ . **m)** FACS analysis on

1135 Annexin-V FITC, marker for early cell apoptosis, and DAPI, marker for late cell apoptosis  
1136 upon different treatment doses of CX-5461; **n**) FACS analysis on Annexin-V FITC and  
1137 2C::tdTomato positive mES cells upon different treatment doses of CX-5461. **o**) FACS  
1138 analysis on DAPI and 2C::tdTomato positive mES cells upon different treatment doses  
1139 of CX-5461. In **e**), **h**), **i**) and **j**), the centre of the box plots represents the median value  
1140 and the lower and upper lines represent the 5% and 95% quantile, respectively.

1141 **Extended Data Fig.S2: Deficiency of rRNA biogenesis disrupted normal nucleolar**  
1142 **LLPS and epigenetic state of PNH region, related to Fig.2. a)** Boxplots demonstrate  
1143 the averaged H3K9me3 and H3K27me3 levels of 101 Inactive Hub fragments, 578 NAD  
1144 fragments and 34888 L1 sequences; \*\*\*:  $p < 0.001$ , Wilcox signed rank test (GEO  
1145 accession GSE166041). **b)** UCSC Genome Browser viewing of H3K9me3 and H3K27me3  
1146 ChIP-seq signals in control and CX-5461 treated mES cells around a representative PNH  
1147 fragment at chr15:4,699,343-5,778,242 (GEO accession GSE166041). **c)** Boxplots  
1148 demonstrate the averaged H3K4me3 and H3K27ac levels of 101 Inactive Hub  
1149 fragments, 578 NAD fragments and 34888 L1 sequences; \*\*\*:  $p < 0.001$ , Wilcox signed  
1150 rank test (GEO accession GSE166041). **d)** UCSC Genome Browser viewing of H3K4me3  
1151 and H3K27ac ChIP-seq signals in control mES cells and CX-5461 treated mES cells  
1152 around a representative PNH fragment at chr10:3,632,504-3,926,058 (GEO accession  
1153 GSE166041). **e)** Heatmap plots demonstrate the levels of chromatin accessibility on  
1154 within 1mb region around start and end sites of Inactive Hub and NAD, and within 1kb  
1155 region around start and end sites of L1 (GEO accession GSE166041). The regions of  
1156 different lengths of Inactive Hub and NAD fragments were fitted to 1mb. The regions  
1157 of different lengths of L1 sequences were fitted to 1kb. SS: start site of a chromatin  
1158 fragment of PNH; ES: end site of a chromatin fragment of PNH. The PNH fragment was  
1159 defined as the L1 contained regions overlapped with Inactive Hub and NAD. **f)** Boxplots  
1160 demonstrate the averaged chromatin accessibility of 101 Inactive Hub fragments, 578  
1161 NAD fragments and 34888 L1 sequences; \*\*\*:  $p < 0.001$ , Wilcox signed rank test (GEO  
1162 accession GSE166041). **g)** UCSC Genome Browser viewing of ATAC-seq signals in  
1163 control and CX-5461 treated mES cells around a representative PNH fragment at



1164 chr19:18,666,449-18,747,509 (GEO accession GSE166041). **h)** Boxplots demonstrate  
1165 the averaged binding signals of NCL and TRIM28 on 101 Inactive Hub fragments, 578  
1166 NAD fragments and 34888 L1 sequences; \*\*:  $p < 0.01$ , \*\*\*:  $p < 0.001$ , Wilcoxon signed rank  
1167 test (GEO accession GSE166041). **i)** UCSC Genome Browser viewing of NCL and TRIM28  
1168 ChIP-seq signals in control and CX-5461 treated mES cells around a representative PNH  
1169 fragment at chr18:7,718,063-8,074,255 (GEO accession GSE166041). In **a)**, **c)**, **f)** and  
1170 **h)**, the centre of the box plots represents the median value and the lower and upper  
1171 lines represent the 5% and 95% quantile, respectively.

1172

1173 **Extended Data Fig.S3: 2C/ERV genes were activated through Dux, related to Fig.3. a)**

1174 Line plots demonstrate the meta-analysis results of chromatin accessibility in Dux-GFP  
1175 positive mES cells and Dux-GFP negative mES cells within 5kb region around  
1176 transcription start sites or transcription start and end sites of 621 commonly induced  
1177 genes between CX-5461 treatment and *Dux* overexpression, 4637 specifically induced  
1178 genes by CX-5461 and 10173 CX-5461 induced ERV genes using published ATAC-seq  
1179 data. The regions of different lengths of ERV genes were fitted to 5kb (GEO accession  
1180 GSE85632). **b)** UCSC Genome Browser viewing of ChIP-seq signals around *Dux* locus  
1181 (GEO accession GSE166041). **c)** Line plots demonstrate the meta-analysis results of  
1182 chromatin accessibility of 621 commonly induced genes between CX-5461 treatment  
1183 and *Dux* overexpression and 10173 CX-5461 induced ERV genes in control mES cells  
1184 and CX-5461 treated mES cells. The regions of different lengths of ERV genes were  
1185 fitted to 5kb (GEO accession GSE166041). **d)** Line plots demonstrate the meta-analysis  
1186 results of chromatin accessibility of 621 commonly induced genes between CX-5461  
1187 treatment and *Dux* overexpression and 10173 CX-5461 induced ERV genes in 2-cell  
1188 embryo and ICM embryo. The regions of different lengths of ERV genes were fitted to  
1189 5kb (GEO accession GSE66390). **e)** Line plots demonstrates the meta-analysis results  
1190 of H3K9me3 and H3K27me3 levels of 621 commonly induced genes between CX-5461  
1191 treatment and *Dux* overexpression in control mES cells and CX-5461 treated mES cells  
1192 (GEO accession GSE166041). **f)** Line plots demonstrate the meta-analysis results of

1193 H3K9me3 and H3K27me3 levels of 621 commonly induced genes between CX-5461  
1194 treatment and *Dux* overexpression in 2-cell embryo and ICM embryo (GEO accession  
1195 GSE66390). **g)** Line plots demonstrate the meta-analysis results of H3K9me3 and  
1196 H3K27me3 levels of 10173 CX-5461 induced ERV genes in control mES cells and CX-  
1197 5461 treated mES cells; The regions of different lengths of ERV genes were fitted to  
1198 5kb (GEO accession GSE166041). **h)** Line plots demonstrate the meta-analysis results  
1199 of H3K9me3 and H3K27me3 levels of 10173 CX-5461 induced ERV genes in 2-cell  
1200 embryo and ICM embryo; The regions of different lengths of ERV genes were fitted to  
1201 5kb (GEO accession GSE66390). **i)** Line plots demonstrate the meta-analysis results of  
1202 H3K4me3 and H3K27ac levels of 621 commonly induced genes between CX-5461  
1203 treatment and *Dux* overexpression in control mES cells and CX-5461 treated mES cells  
1204 (GEO accession GSE166041). **j)** Line plots demonstrate the meta-analysis results of  
1205 H3K4me3 and H3K27ac levels of 10173 CX-5461 induced ERV genes in control mES  
1206 cells and CX-5461 treated mES cells; The regions of different lengths of ERV genes were  
1207 fitted to 5kb (GEO accession GSE66390).

1208 **Extended Data Fig.S4: rRNA biogenesis defect drove 3D chromatin structure**  
1209 **reorganization of PNH and MERVL regions towards the 2C-like state, related to Fig.4.**

1210 **a)** Hi-C contact maps of Inactive Hub/NAD/L1 and 1.5 Mb genomic regions around *Dux*  
1211 at 150kb resolution during mouse pre-implantation embryos development. The  
1212 zoomed-in regions aim to demonstrate the change of Hi-C contacts between *Dux* and  
1213 chromosome 10 during mouse pre-implantation embryos development (GEO  
1214 accession GSE82185). **b)** Scatter plot demonstrates the  $\log_2(\text{fold change})$  of Hi-C  
1215 contacts between Inactive Hub/NAD/L1 and different types of genes in early 2-cell and  
1216 ICM stage embryos (GEO accession GSE82185). **c)** Hi-C pearson correlation heat maps  
1217 of Inactive Hub/NAD/L1 and 1.5 Mb genomic regions around *Dux* at 150kb resolution  
1218 during mouse pre-implantation embryos development. The zoomed-in regions aim to  
1219 demonstrate the change of Hi-C PCC between *Dux* and chromosome 10 during mouse  
1220 pre-implantation embryos development (GEO accession GSE82185). **d)** Scatter plot  
1221 demonstrates the PCC difference between Inactive Hub/NAD/L1 and different types of

1222 genes in early 2-cell and ICM stage embryos (GEO accession GSE82185). **e)** A/B  
1223 interaction profile showing contact enrichment between active and inactive  
1224 compartments (GEO accession GSE166041 and GSE63525). **f)** Quantification of  
1225 compartment strength; \*:  $p < 0.05$ , \*\*\*:  $p < 0.001$ , Wilcoxon signed rank test. **g)** Pearson  
1226 correlation heat maps for chromosome 16 at 500kb resolution to demonstrate A/B  
1227 compartment (GEO accession GSE166041 and GSE63525). **h)** Hi-C contact maps for  
1228 chromosome 16 at 500kb resolution for A/B compartment profile. **i)**  
1229 Observed/Expected (O/E) aggregate plot of TADs (GEO accession GSE166041 and  
1230 GSE63525). **j)** Quantification of TAD strength; \*:  $p < 0.05$ , \*\*\*:  $p < 0.001$ , Wilcoxon signed  
1231 rank test (GEO accession GSE166041 and GSE63525). **k)** O/E aggregate plots of  
1232 chromatin loops (GEO accession GSE166041 and GSE63525). **l)** Quantification of loop  
1233 strength; \*\*\*:  $p < 0.001$ , Wilcoxon signed rank test (GEO accession GSE166041 and  
1234 GSE63525). **m)** Hi-C contact maps for chromosome 16:27.3-36.2mb region at 40kb  
1235 resolution to demonstrate TAD and chromatin loop (GEO accession GSE166041 and  
1236 GSE63525). **n)** Insulation score, expression (TPM), ATAC-seq (BPM), H3K9me3 (BPM),  
1237 H3K27me3 (BPM), H3K4me3 (BPM) and H3K27ac (BPM) signals of control and CX-  
1238 5461-treated mES cells centered on CX-5461-induced *MERVL* genes (GEO accession  
1239 GSE166041). **o)** Representative 40kb Hi-C O/E interaction matrices of a *MERVL* loci  
1240 (chr15:76,145,960-86,151,258) located at TAD boundaries are shown as heatmaps,  
1241 along with insulation score and genome browser tracks of RNA-Seq, H3K9me3,  
1242 H3K27me3, H3K4me3 and H3K27ac ChIP-Seq signals of the expanded genomic region  
1243 containing the TAD boundary (arrows) in control and CX-5461-treated mES cells as well  
1244 as in mouse early embryos (GEO accession GSE166041).

1245 **Extended Data Fig.S5: Genetic interferences of rRNA biogenesis recapitulate CX-**  
1246 **5461-induced 2C-like molecular phenotypes, related to Fig.5.** **a)** Western Blotting  
1247 experiment showing the Pol I protein degradation after 24h of Auxin treatment. **b)** PCR experiment  
1248 showing that a 400bp band was observed in the snoRNA KO mES cells, but not in the wild-type  
1249 (WT) mES cells. As a band of 400bp was designed especially in the snoRNA KO mES cells, this result  
1250 indicates that the homologs of human SNORD113-114 gene cluster was successfully knocked-out.

1251 **c)** Shown images are representative of 4 times of NCL FRAP experiments in control mES  
1252 cells and Pol I degraded mES cells. **d)** Shown images are representative of 4 times of of  
1253 NPM1 FRAP experiments in control mES cells and Pol I degraded mES cells. **e)** Shown  
1254 images are representative of 4 times of NCL FRAP experiments in control mES cells and  
1255 snoRNA knockout mES cells. **f)** Shown images are representative of 4 times of NPM1  
1256 FRAP experiments in control mES cells and snoRNA knockout mES cells. **g)** FACS  
1257 analysis on 2C::tdTomato+ mES cells in Pol I degraded mES cell lines, showing the  
1258 change of percentage of 2C-like cells. **h)** FACS analysis on 2C::tdTomato+ mES cells in  
1259 snoRNA knockout mES cell lines, showing the change of percentage of 2C-like cells.  
1260 **Extended Data Fig.S6: rRNA biogenesis is critically required at the 2-cell-to-4-cell**  
1261 **stage transition during pre-implantation embryo development, related to Fig.6. a)**  
1262 Expression pattern of Ribosome biogenesis gene set across different early embryo  
1263 developmental stages. *n* denotes the number of sub-classes of *MERVL* genes. **b)**  
1264 Expression pattern of *MERVL-int* genes across different embryo developmental stages.  
1265 *seq\_n* denotes the number of annotated *MERVL-int* sequences in the mouse mm10  
1266 reference genome. **c)** Expression pattern of *MT2\_Mm* genes across different embryo  
1267 developmental stages. *seq\_n* denotes the number of annotated *MT2\_Mm* sequences  
1268 in the mouse mm10 reference genome. **d)** Expression pattern of 2C marker genes, *Dux*,  
1269 *Zscan4d* and *Gm12794*, across different embryo developmental stages. **e)**  
1270 Representative images of mouse embryos produced from control and CX-5461  
1271 treatment during two different developmental stages; Dpc: Days post-coitum. This  
1272 experiment was repeated three times independently with similar results. **f)**  
1273 Immunofluorescence staining of NCL, NPM1 and FBL in control blastocyst embryos and  
1274 CX-5461-treated blastocyst embryos.

1275

## 1276 References

- 1277 1 Macfarlan, T. S. *et al.* Embryonic stem cell potency fluctuates with endogenous  
1278 retrovirus activity. *Nature* **487**, 57-63, doi:10.1038/nature11244 (2012).
- 1279 2 Choi, Y. J. & Lin, C. P. Deficiency of microRNA miR-34a expands cell fate potential  
1280 in pluripotent stem cells. *Science* **355**, doi:10.1126/science.aag1927 (2017).

- 1281 3 Zalzman, M. *et al.* Zscan4 regulates telomere elongation and genomic stability in  
1282 ES cells. *Nature* **464**, 858-863, doi:10.1038/nature08882 (2010).
- 1283 4 Matsui, T. *et al.* Proviral silencing in embryonic stem cells requires the histone  
1284 methyltransferase ESET. *Nature* **464**, 927-931, doi:10.1038/nature08858 (2010).
- 1285 5 Rowe, H. M. *et al.* KAP1 controls endogenous retroviruses in embryonic stem  
1286 cells. *Nature* **463**, 237-240, doi:10.1038/nature08674 (2010).
- 1287 6 Fu, X., Wu, X. & Djekidel, M. N. Myc and Dnmt1 impede the pluripotent to  
1288 totipotent state transition in embryonic stem cells. *Nat Cell Biol* **21**, 835-844,  
1289 doi:10.1038/s41556-019-0343-0 (2019).
- 1290 7 Dan, J. *et al.* Zscan4 Inhibits Maintenance DNA Methylation to Facilitate  
1291 Telomere Elongation in Mouse Embryonic Stem Cells. *Cell Rep* **20**, 1936-1949,  
1292 doi:10.1016/j.celrep.2017.07.070 (2017).
- 1293 8 Guallar, D. *et al.* RNA-dependent chromatin targeting of TET2 for endogenous  
1294 retrovirus control in pluripotent stem cells. *Nat Genet* **50**, 443-451,  
1295 doi:10.1038/s41588-018-0060-9 (2018).
- 1296 9 Yang, B. X. *et al.* Systematic identification of factors for provirus silencing in  
1297 embryonic stem cells. *Cell* **163**, 230-245, doi:10.1016/j.cell.2015.08.037 (2015).
- 1298 10 De Iaco, A. *et al.* DUX-family transcription factors regulate zygotic genome  
1299 activation in placental mammals. *Nat Genet* **49**, 941-945, doi:10.1038/ng.3858  
1300 (2017).
- 1301 11 Hendrickson, P. G. *et al.* Conserved roles of mouse DUX and human DUX4 in  
1302 activating cleavage-stage genes and MERVL/HERVL retrotransposons. *Nat Genet* **49**,  
1303 925-934, doi:10.1038/ng.3844 (2017).
- 1304 12 Whiddon, J. L., Langford, A. T., Wong, C. J., Zhong, J. W. & Tapscott, S. J.  
1305 Conservation and innovation in the DUX4-family gene network. *Nat Genet* **49**, 935-  
1306 940, doi:10.1038/ng.3846 (2017).
- 1307 13 Yang, F. *et al.* DUX-miR-344-ZMYM2-Mediated Activation of MERVL LTRs Induces  
1308 a Totipotent 2C-like State. *Cell Stem Cell* **26**, 234-250.e237,  
1309 doi:10.1016/j.stem.2020.01.004 (2020).
- 1310 14 Percharde, M. *et al.* A LINE1-Nucleolin Partnership Regulates Early Development  
1311 and ESC Identity. *Cell* **174**, 391-405 e319, doi:10.1016/j.cell.2018.05.043 (2018).
- 1312 15 Wu, K. *et al.* SETDB1-Mediated Cell Fate Transition between 2C-Like and  
1313 Pluripotent States. *Cell Rep* **30**, 25-36.e26, doi:10.1016/j.celrep.2019.12.010 (2020).
- 1314 16 Eckersley-Maslin, M. & Alda-Catalinas, C. Dppa2 and Dppa4 directly regulate the  
1315 Dux-driven zygotic transcriptional program. *Gene Dev* **33**, 194-208,  
1316 doi:10.1101/gad.321174.118 (2019).
- 1317 17 Hu, Z. & Tan, D. E. K. Maternal factor NELFA drives a 2C-like state in mouse

- 1318 embryonic stem cells. *Nat Cell Biol* **22**, 175-186, doi:10.1038/s41556-019-0453-8  
1319 (2020).
- 1320 18 Ishiuchi, T. *et al.* Early embryonic-like cells are induced by downregulating  
1321 replication-dependent chromatin assembly. *Nat Struct Mol Biol* **22**, 662-671,  
1322 doi:10.1038/nsmb.3066 (2015).
- 1323 19 Zhang, Y., Li, T. & Preissl, S. Transcriptionally active HERV-H retrotransposons  
1324 demarcate topologically associating domains in human pluripotent stem cells. *Nat*  
1325 *Genet* **51**, 1380-1388, doi:10.1038/s41588-019-0479-7 (2019).
- 1326 20 Chen, X. *et al.* Key role for CTCF in establishing chromatin structure in human  
1327 embryos. *Nature* **576**, 306-310, doi:10.1038/s41586-019-1812-0 (2019).
- 1328 21 Du, Z. *et al.* Allelic reprogramming of 3D chromatin architecture during early  
1329 mammalian development. *Nature* **547**, 232-235, doi:10.1038/nature23263 (2017).
- 1330 22 Hug, C. B. & Vaquerizas, J. M. The Birth of the 3D Genome during Early  
1331 Embryonic Development. *Trends Genet* **34**, 903-914, doi:10.1016/j.tig.2018.09.002  
1332 (2018).
- 1333 23 Kruse, K. *et al.* Transposable elements drive reorganisation of 3D chromatin  
1334 during early embryogenesis. *bioRxiv*, 523712, doi:10.1101/523712 (2019).
- 1335 24 Guetg, C. & Santoro, R. Formation of nuclear heterochromatin: the nucleolar  
1336 point of view. *Epigenetics* **7**, 811-814, doi:10.4161/epi.21072 (2012).
- 1337 25 Németh, A. & Längst, G. Genome organization in and around the nucleolus.  
1338 *Trends Genet* **27**, 149-156, doi:10.1016/j.tig.2011.01.002 (2011).
- 1339 26 Bywater, M. J. *et al.* Inhibition of RNA polymerase I as a therapeutic strategy to  
1340 promote cancer-specific activation of p53. *Cancer Cell* **22**, 51-65,  
1341 doi:10.1016/j.ccr.2012.05.019 (2012).
- 1342 27 Fujiwara, Y. *et al.* A Nucleolar Stress-Specific p53-miR-101 Molecular Circuit  
1343 Functions as an Intrinsic Tumor-Suppressor Network. *EBioMedicine* **33**, 33-48,  
1344 doi:10.1016/j.ebiom.2018.06.031 (2018).
- 1345 28 Wang, C., Liu, X. & Gao, Y. Reprogramming of H3K9me3-dependent  
1346 heterochromatin during mammalian embryo development. *Nat Cell Biol* **20**, 620-631,  
1347 doi:10.1038/s41556-018-0093-4 (2018).
- 1348 29 Wu, J. *et al.* The landscape of accessible chromatin in mammalian  
1349 preimplantation embryos. *Nature* **534**, 652-657, doi:10.1038/nature18606 (2016).
- 1350 30 Akiyama, T. *et al.* Transient bursts of Zscan4 expression are accompanied by the  
1351 rapid derepression of heterochromatin in mouse embryonic stem cells. *DNA*  
1352 *research* : an international journal for rapid publication of reports on genes and  
1353 genomes **22**, 307-318, doi:10.1093/dnares/dsv013 (2015).
- 1354 31 Ecco, G. *et al.* Transposable Elements and Their KRAB-ZFP Controllers Regulate

- 1355 Gene Expression in Adult Tissues. *Dev Cell* **36**, 611-623,  
1356 doi:10.1016/j.devcel.2016.02.024 (2016).
- 1357 32 Bastola, P., Neums, L., Schoenen, F. J. & Chien, J. VCP inhibitors induce  
1358 endoplasmic reticulum stress, cause cell cycle arrest, trigger caspase-mediated cell  
1359 death and synergistically kill ovarian cancer cells in combination with Salubrinal. *Mol*  
1360 *Oncol* **10**, 1559-1574, doi:10.1016/j.molonc.2016.09.005 (2016).
- 1361 33 Hung, S. S. et al. Repression of global protein synthesis by Eif1a-like genes that  
1362 are expressed specifically in the two-cell embryos and the transient Zscan4-positive  
1363 state of embryonic stem cells. *DNA Res* **20**, 391-402, doi:10.1093/dnares/dst018  
1364 (2013).
- 1365 34 Eckersley-Maslin, M. A. et al. MERVL/Zscan4 Network Activation Results in  
1366 Transient Genome-wide DNA Demethylation of mESCs. *Cell Rep* **17**, 179-192,  
1367 doi:10.1016/j.celrep.2016.08.087 (2016).
- 1368 35 Yao, R. W., Xu, G., Wang, Y., Shan, L. & Chen, L. L. Nascent Pre-rRNA Sorting via  
1369 Phase Separation Drives the Assembly of Dense Fibrillar Components in the Human  
1370 Nucleolus. *Mol Cell* **76**, 767-783.e711 (2019).
- 1371 36 Feric, M. et al. Coexisting Liquid Phases Underlie Nucleolar Subcompartments.  
1372 *Cell* **165**, 1686-1697, doi:10.1016/j.cell.2016.04.047 (2016).
- 1373 37 Lafontaine, D. L. J., Riback, J. A., Bascetin, R. & Brangwynne, C. P. The nucleolus  
1374 as a multiphase liquid condensate. *Nat Rev Mol Cell Biol* **22**, 165-182,  
1375 doi:10.1038/s41580-020-0272-6 (2020).
- 1376 38 Frottin, F. & Schueder, F. The nucleolus functions as a phase-separated protein  
1377 quality control compartment. *Science* **365**, 342-347, doi:10.1126/science.aaw9157  
1378 (2019).
- 1379 39 Strom, A. R. et al. Phase separation drives heterochromatin domain formation.  
1380 *Nature* **547**, 241-245, doi:10.1038/nature22989 (2017).
- 1381 40 Sanulli, S. et al. HP1 reshapes nucleosome core to promote phase separation of  
1382 heterochromatin. *Nature* **575**, 390-394, doi:10.1038/s41586-019-1669-2 (2019).
- 1383 41 Hnisz, D., Shrinivas, K., Young, R. A., Chakraborty, A. K. & Sharp, P. A. A Phase  
1384 Separation Model for Transcriptional Control. *Cell* **169**, 13-23,  
1385 doi:10.1016/j.cell.2017.02.007 (2017).
- 1386 42 Quinodoz, S. A. et al. Higher-Order Inter-chromosomal Hubs Shape 3D Genome  
1387 Organization in the Nucleus. *Cell* **174**, 744-757.e724, doi:10.1016/j.cell.2018.05.024  
1388 (2018).
- 1389 43 Lu, J. Y. et al. Genomic Repeats Categorize Genes with Distinct Functions for  
1390 Orchestrated Regulation. *Cell Rep* **30**, 3296-3311.e3295,  
1391 doi:10.1016/j.celrep.2020.02.048 (2020).
- 1392 44 Gupta, S. & Santoro, R. Regulation and Roles of the Nucleolus in Embryonic Stem

- 1393 Cells: From Ribosome Biogenesis to Genome Organization. *Stem Cell Rep* **15**, 1206-  
1394 1219, doi:10.1016/j.stemcr.2020.08.012 (2020).
- 1395 45 Bizhanova, A., Yan, A., Yu, J., Zhu, L. J. & Kaufman, P. D. Distinct features of  
1396 nucleolus-associated domains in mouse embryonic stem cells. *Chromosoma* **129**,  
1397 121-139, doi:10.1007/s00412-020-00734-9 (2020).
- 1398 46 Németh, A. et al. Initial genomics of the human nucleolus. *PLoS genetics* **6**,  
1399 e1000889, doi:10.1371/journal.pgen.1000889 (2010).
- 1400 47 Guetg, C. et al. The NoRC complex mediates the heterochromatin formation and  
1401 stability of silent rRNA genes and centromeric repeats. *The EMBO journal* **29**, 2135-  
1402 2146, doi:10.1038/emboj.2010.17 (2010).
- 1403 48 Lu, J. Y. et al. Homotypic clustering of L1 and B1/Alu repeats compartmentalizes  
1404 the 3D genome. *Cell Res* **31**, 613-630, doi:10.1038/s41422-020-00466-6 (2021).
- 1405 49 Bersaglieri, C. et al. Genome-wide maps of nucleolus interactions reveal distinct  
1406 layers of repressive chromatin domains. bioRxiv (2020).
- 1407 50 Li, M. et al. Distinct regulatory mechanisms and functions for p53-activated and  
1408 p53-repressed DNA damage response genes in embryonic stem cells. *Mol Cell* **46**, 30-  
1409 42, doi:10.1016/j.molcel.2012.01.020 (2012).
- 1410 51 Latonen, L. Phase-to-Phase With Nucleoli-Stress Responses, Protein Aggregation  
1411 and Novel Roles of RNA. *Front Cell Neurosci* **13**, 151, doi:10.3389/fncel.2019.00151  
1412 (2019).
- 1413 52 Boulon, S., Westman, B. J., Hutten, S., Boisvert, F. M. & Lamond, A. I. The  
1414 nucleolus under stress. *Mol Cell* **40**, 216-227, doi:10.1016/j.molcel.2010.09.024  
1415 (2010).
- 1416 53 Nicolas, E. et al. Involvement of human ribosomal proteins in nucleolar structure  
1417 and p53-dependent nucleolar stress. *Nat Commun* **7**, 11390,  
1418 doi:10.1038/ncomms11390 (2016).
- 1419 54 Yang, K., Yang, J. & Yi, J. Nucleolar Stress: hallmarks, sensing mechanism and  
1420 diseases. *Cell Stress* **2**, 125-140, doi:10.15698/cst2018.06.139 (2018).
- 1421 55 Golomb, L., Volarevic, S. & Oren, M. p53 and ribosome biogenesis stress: the  
1422 essentials. *FEBS Lett* **588**, 2571-2579, doi:10.1016/j.febslet.2014.04.014 (2014).
- 1423 56 Zhang, Y. & Lu, H. Signaling to p53: ribosomal proteins find their way. *Cancer Cell*  
1424 **16**, 369-377, doi:10.1016/j.ccr.2009.09.024 (2009).
- 1425 57 Yang, A. et al. Nucleolin maintains embryonic stem cell self-renewal by  
1426 suppression of p53 protein-dependent pathway. *J Biol Chem* **286**, 43370-43382,  
1427 doi:10.1074/jbc.M111.225185 (2011).
- 1428 58 Liu, X. et al. Distinct features of H3K4me3 and H3K27me3 chromatin domains in  
1429 pre-implantation embryos. *Nature* **537**, 558-562, doi:10.1038/nature19362 (2016).



- 1430 59 Rao, S. S. et al. A 3D map of the human genome at kilobase resolution reveals  
1431 principles of chromatin looping. *Cell* **159**, 1665-1680, doi:10.1016/j.cell.2014.11.021  
1432 (2014).
- 1433 60 Crane, E. et al. Condensin-driven remodelling of X chromosome topology during  
1434 dosage compensation. *Nature* **523**, 240-244, doi:10.1038/nature14450 (2015).
- 1435 61 Jiang, Y. et al. Genome-wide analyses of chromatin interactions after the loss of  
1436 Pol I, Pol II, and Pol III. *Genome Biol* **21**, 158, doi:10.1186/s13059-020-02067-3  
1437 (2020).
- 1438 62 Bello, S. M., Smith, C. L. & Eppig, J. T. Allele, phenotype and disease data at  
1439 Mouse Genome Informatics: improving access and analysis. *Mamm Genome* **26**, 285-  
1440 294, doi:10.1007/s00335-015-9582-y (2015).
- 1441 63 Borsos, M. & Torres-Padilla, M. E. Building up the nucleus: nuclear organization  
1442 in the establishment of totipotency and pluripotency during mammalian  
1443 development. *Gene Dev* **30**, 611-621, doi:10.1101/gad.273805.115 (2016).
- 1444 64 Fulka, H. & Aoki, F. Nucleolus Precursor Bodies and Ribosome Biogenesis in Early  
1445 Mammalian Embryos: Old Theories and New Discoveries. *Biol Reprod* **94**, 143,  
1446 doi:10.1095/biolreprod.115.136093 (2016).
- 1447 65 Kresoja-Rakic, J. & Santoro, R. Nucleolus and rRNA Gene Chromatin in Early  
1448 Embryo Development. *Trends Genet* **35**, 868-879, doi:10.1016/j.tig.2019.06.005  
1449 (2019).
- 1450 66 Savić, N. et al. lncRNA maturation to initiate heterochromatin formation in the  
1451 nucleolus is required for exit from pluripotency in ESCs. *Cell Stem Cell* **15**, 720-734,  
1452 doi:10.1016/j.stem.2014.10.005 (2014).
- 1453 67 Boija, A. et al. Transcription Factors Activate Genes through the Phase-  
1454 Separation Capacity of Their Activation Domains. *Cell* **175**, 1842-1855.e1816,  
1455 doi:10.1016/j.cell.2018.10.042 (2018).
- 1456 68 Sabari, B. R. et al. Coactivator condensation at super-enhancers links phase  
1457 separation and gene control. *Science* **361**, eaar3958, doi:10.1126/science.aar3958  
1458 (2018).
- 1459 69 Gibson, B. A. et al. Organization of Chromatin by Intrinsic and Regulated Phase  
1460 Separation. *Cell* **179**, 470-484.e421, doi:10.1016/j.cell.2019.08.037 (2019).
- 1461 70 Wu M. et al.. lncRNA SLERT controls phase separation of FC/DFCs to facilitate Pol  
1462 I transcription. *Science* **373**, 547-555. doi: 10.1126/science.abf6582 (2021).
- 1463 71 Leslie, M. Separation anxiety. *Science* **371**, 336-338,  
1464 doi:10.1126/science.371.6527.336 (2021).
- 1465 72 Wang, S. et al. Spatial organization of chromatin domains and compartments in  
1466 single chromosomes. *Science* **353**, 598-602, doi:10.1126/science.aaf8084 (2016).

- 1467 73 Chen, K. H., Boettiger, A. N., Moffitt, J. R., Wang, S. & Zhuang, X. RNA imaging.  
1468 Spatially resolved, highly multiplexed RNA profiling in single cells. *Science* **348**,  
1469 aaa6090, doi:10.1126/science.aaa6090 (2015).
- 1470 74 Beliveau, B. J. et al. Single-molecule super-resolution imaging of chromosomes  
1471 and in situ haplotype visualization using Oligopaint FISH probes. *Nat Comm* **6**, 7147,  
1472 doi:10.1038/ncomms8147 (2015).
- 1473 75 Bolger, A. M., Marc, L. & Bjoern, U. Trimmomatic: a flexible trimmer for Illumina  
1474 sequence data. *Bioinformatics* **30**, 2114-2120 (2014).
- 1475 76 Daehwan, K., Ben, L. & Salzberg, S. L. HISAT: a fast spliced aligner with low  
1476 memory requirements. *Nat Methods* **12**, 357-360 (2015).
- 1477 77 Mihaela, P. et al. StringTie enables improved reconstruction of a transcriptome  
1478 from RNA-seq reads. *Nat Biotechnol* **33**, 290-295 (2015).
- 1479 78 Cabili, M. N. et al. Integrative annotation of human large intergenic noncoding  
1480 RNAs reveals global properties and specific subclasses. *Gene Dev* **25**, 1915 (2011).
- 1481 79 Zilionis, R. et al. Single-cell barcoding and sequencing using droplet microfluidics.  
1482 *Nat Protoc* **12**, 44-73 (2016).
- 1483 80 Langmead B, Salzberg SL. Fast gapped-read alignment with Bowtie 2. *Nat*  
1484 *Methods* **9**, 357-359. doi: 10.1038/nmeth.1923 (2012).
- 1485 81 Ramírez F. et al. deepTools2: a next generation web server for deep-sequencing  
1486 data analysis. *Nucleic Acids Res* **44**, W160-5. doi: 10.1093/nar/gkw257 (2016).
- 1487 82 Heinz S. et al. Simple combinations of lineage-determining transcription factors  
1488 prime cis-regulatory elements required for macrophage and B cell identities. *Mol Cell*  
1489 **38**, 576-589. doi: 10.1016/j.molcel.2010.05.004 (2010).
- 1490 83 Servant, N. et al. HiC-Pro: an optimized and flexible pipeline for Hi-C data  
1491 processing. *Genome Biol* **16**, 259, doi:10.1186/s13059-015-0831-x (2015).
- 1492 84 Lieberman-Aiden, E. et al. Comprehensive mapping of long-range interactions  
1493 reveals folding principles of the human genome. *Science* **326**, 289-293,  
1494 doi:10.1126/science.1181369 (2009).
- 1495 85 Fidel, R. et al. High-resolution TADs reveal DNA sequences underlying genome  
1496 organization in flies. *Nat Commun*, **9**, 189, doi.org/10.1038/s41467-017-02525-w  
1497 (2018).
- 1498 86 Imakaev, M. et al. Iterative correction of Hi-C data reveals hallmarks of  
1499 chromosome organization. *Nat Methods* **9**, 999-1003, doi:10.1038/nmeth.2148  
1500 (2012).
- 1501 87 Flyamer, I. M. et al. Single-nucleus Hi-C reveals unique chromatin reorganization  
1502 at oocyte-to-zygote transition. *Nature* **544**, 110-114, doi:10.1038/nature21711  
1503 (2017).

1504 88 Durand N.C. et al. Juicer Provides a One-Click System for Analyzing Loop-  
1505 Resolution Hi-C Experiments. *Cell Syst* **3**, 95-98. doi: 10.1016/j.cels.2016.07.002  
1506 (2016).

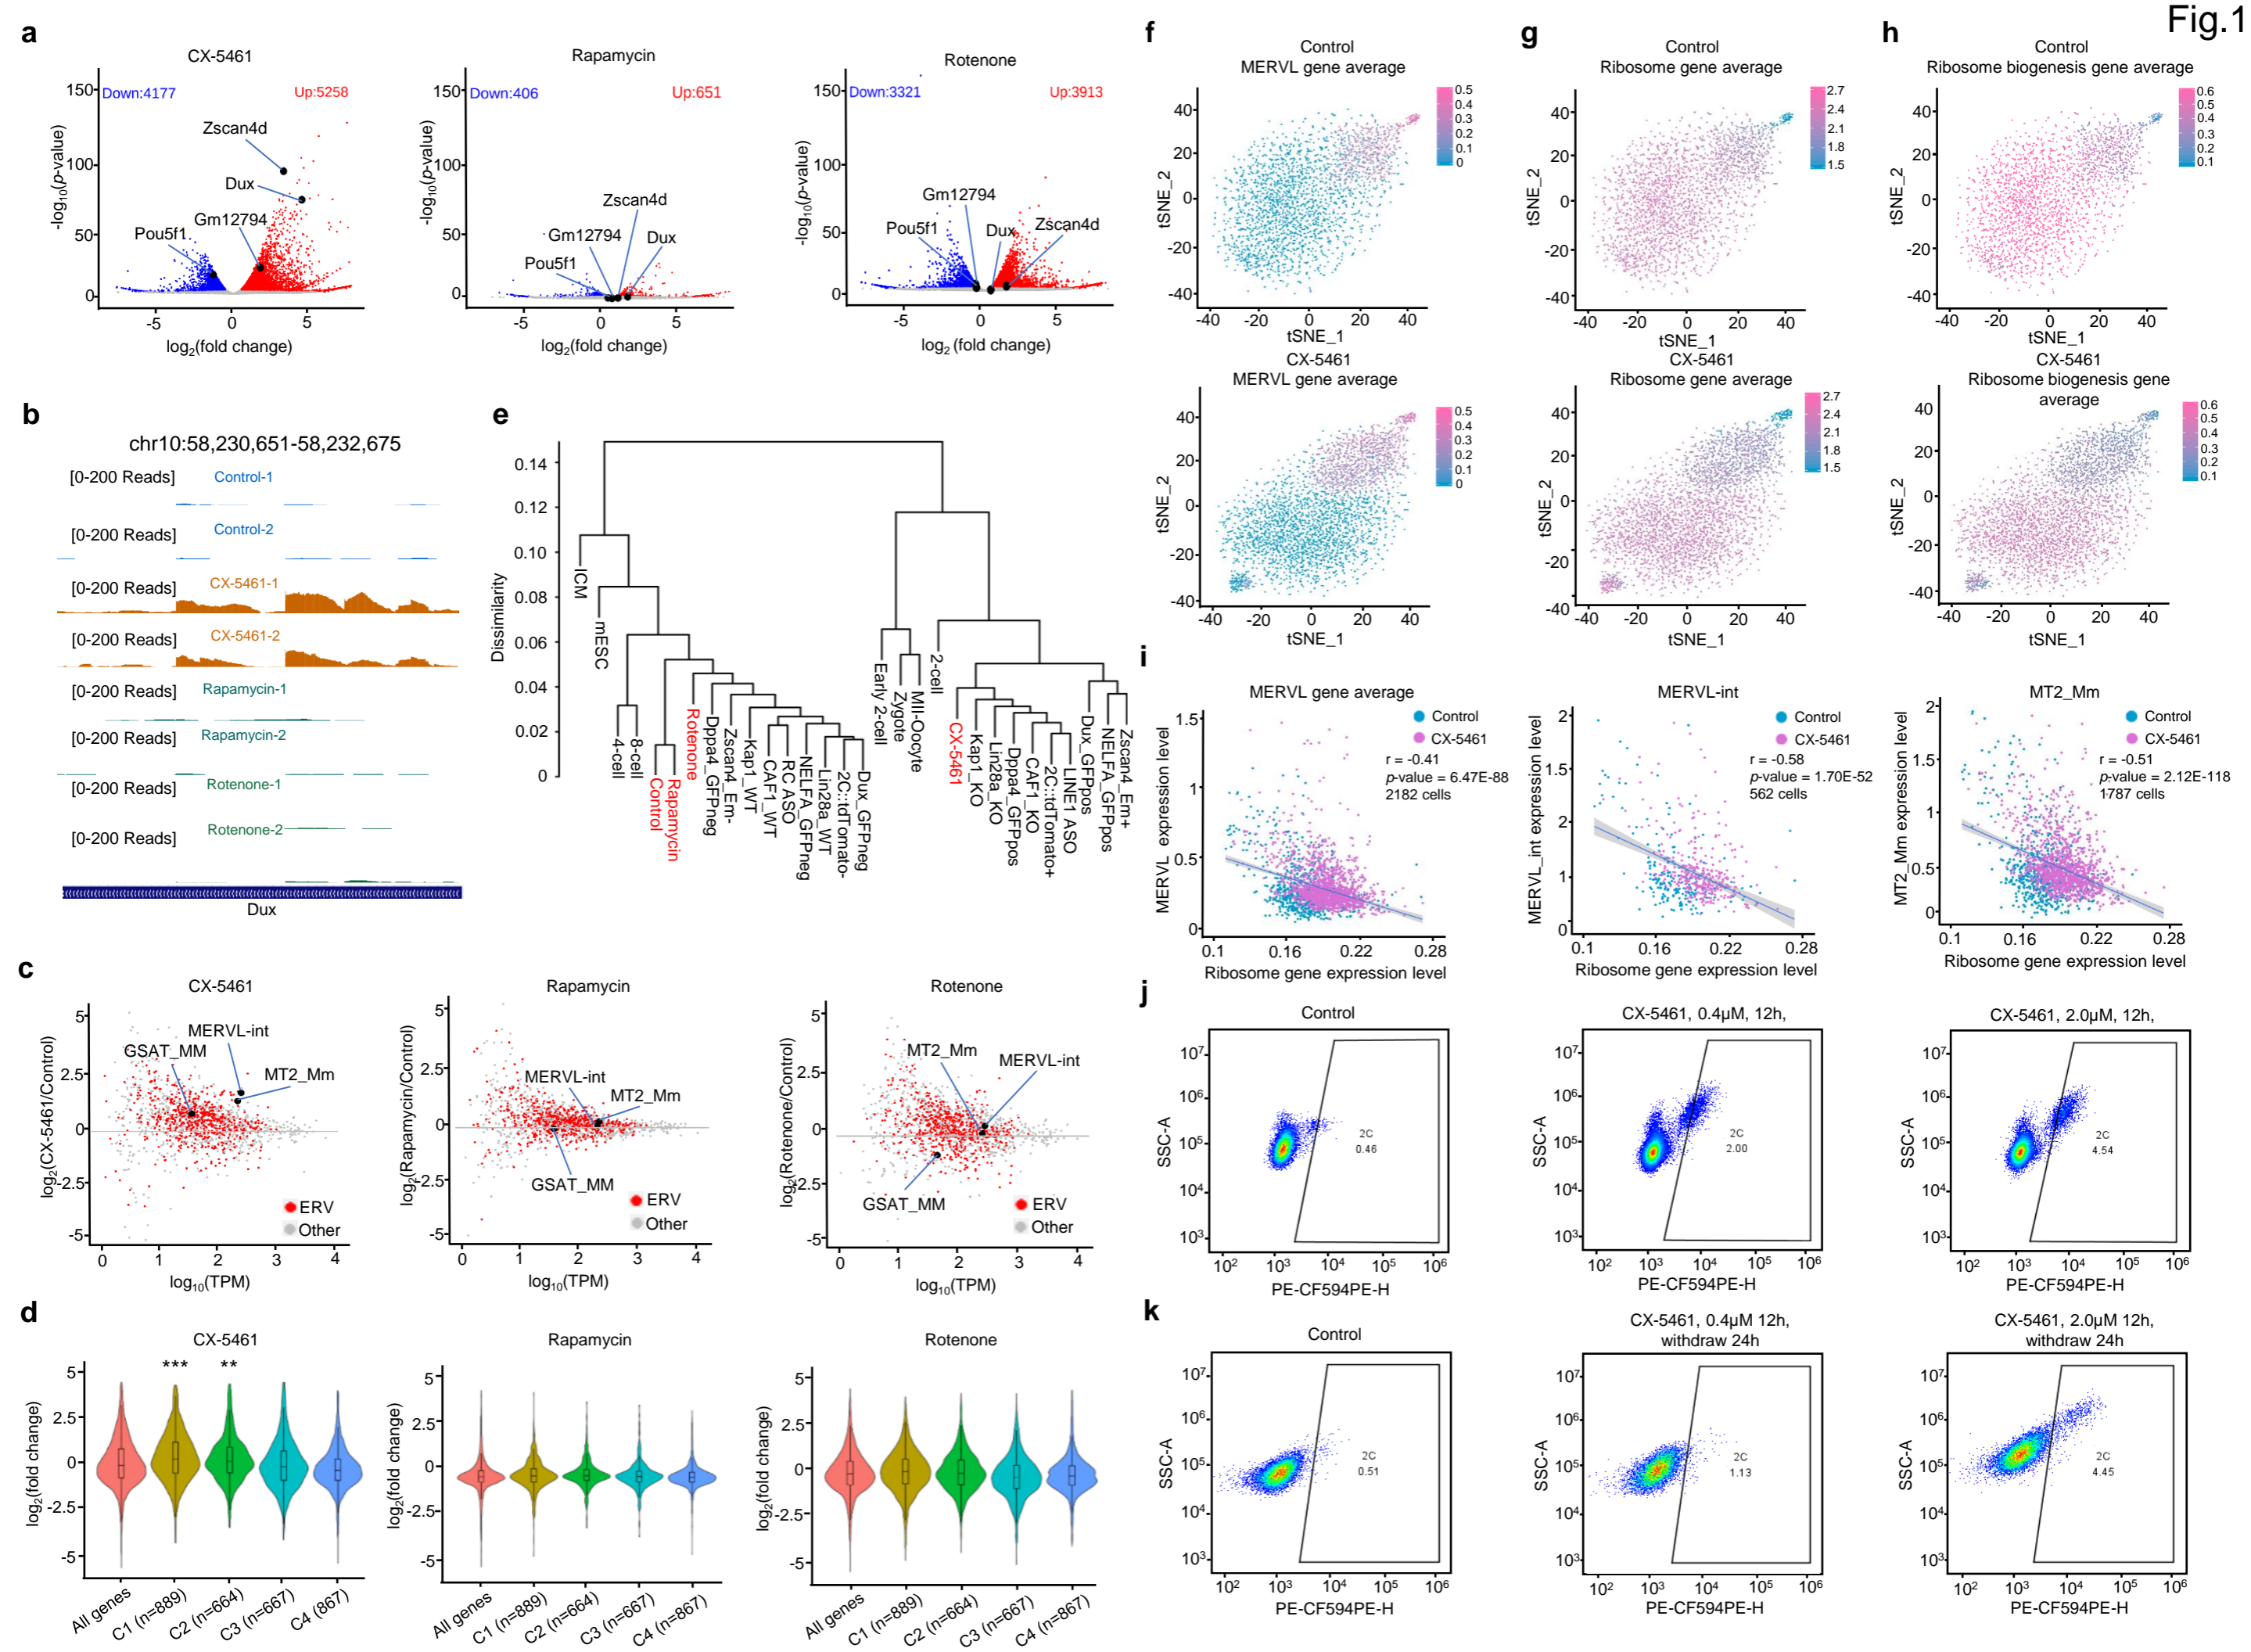

**Fig.1: Inhibition of rRNA biogenesis activated 2C-like transcriptional program and induced an expanded 2C-like cell population in mES cells.** **a)** Volcano plots of RNA-sequencing data comparing gene expression of control and cellular stress inducer-treated mES cells (GEO accession GSE166041). **b)** UCSC Genome Browser viewing of RNA-sequencing results at the *Dux* locus (GEO accession GSE166041). **c)** MA plots of RNA-sequencing data comparing repeat sequence expression of control and cellular stress inducer-treated mES cells (GEO accession GSE166041). **d)** Violin plots demonstrating the expressional changes of stage-specific gene clusters of mouse pre-implantation embryos under different types of cellular stress treatment; \*\*:  $p < 0.01$ , \*\*\*:  $p < 0.001$ , Mann-Whitney U test (GEO accession GSE166041). **e)** Hierarchical clustering of transcriptomes from our study, published 2C-like cell model studies and pre-implantation mouse embryos; Control, CX-5461, Rotenone and Rapamycin (GEO accession GSE166041), 2C::tdTomato+ and 2C::tdTomato- (GEO accession GSE33923); *Zscan4\_Em+* and *Zscan4\_Em-* (GEO accession GSE51682); *Kap1\_KO* and *Kap1\_WT* (GEO accession GSE74278); *CAF1\_WT* and *CAF1\_KO* (GEO accession GSE85632), *Dux\_GFPpos* and *Dux\_GFPneg* (GEO accession GSE85632); LINE1 ASO and RC ASO (GEO accession GSE100939); *Dppa4\_GFPpos* and *Dppa4\_GFPneg* (GEO accession GSE120953), *NELFA\_GFPpos* and *NELFA\_GFPneg* (GEO accession GSE113671); *Lin28a\_KO* and *Lin28a\_WT* (GEO accession GSE164420); MII-Oocyte, Zygote, Early 2-cell, 2-cell, 4-cell, 8-cell, ICM and mES cells (GEO accession GSE66390). **f)** tSNE feature plots demonstrating the averaged expression levels of *MERVL* genes in 2981 control mES cells and 3219 CX-5461-treated mES cells. **g)** tSNE feature plots demonstrating the averaged expression levels of ribosome genes in 2981 control mES cells and 3219 CX-5461-treated mES cells. **h)** tSNE feature plots demonstrating the averaged expression levels of ribosome biogenesis genes in 2981 control mES cells and 3219 CX-5461-treated mES cells (GEO accession GSE166041). **i)** Scatter plots demonstrating negative correlation of expression level between *MERVL/MERVL-int/MT2\_Mm* and ribosome genes; Each dot represents a single cell with detectable ERV expression;  $r$  denotes correlation coefficient;  $p$ -value was obtained by `cor.test` function in R software (GEO accession GSE166041). **j)** FACS analysis on 2C::tdTomato+ mES cells upon different treatment doses of CX-5461, showing the change of percentage of 2C-like cells. **k)** FACS analysis on 2C::tdTomato+ mES cells after 12 hour treatment and 24 hour withdrawal of CX-5461, showing the change of percentage of 2C-like cells.

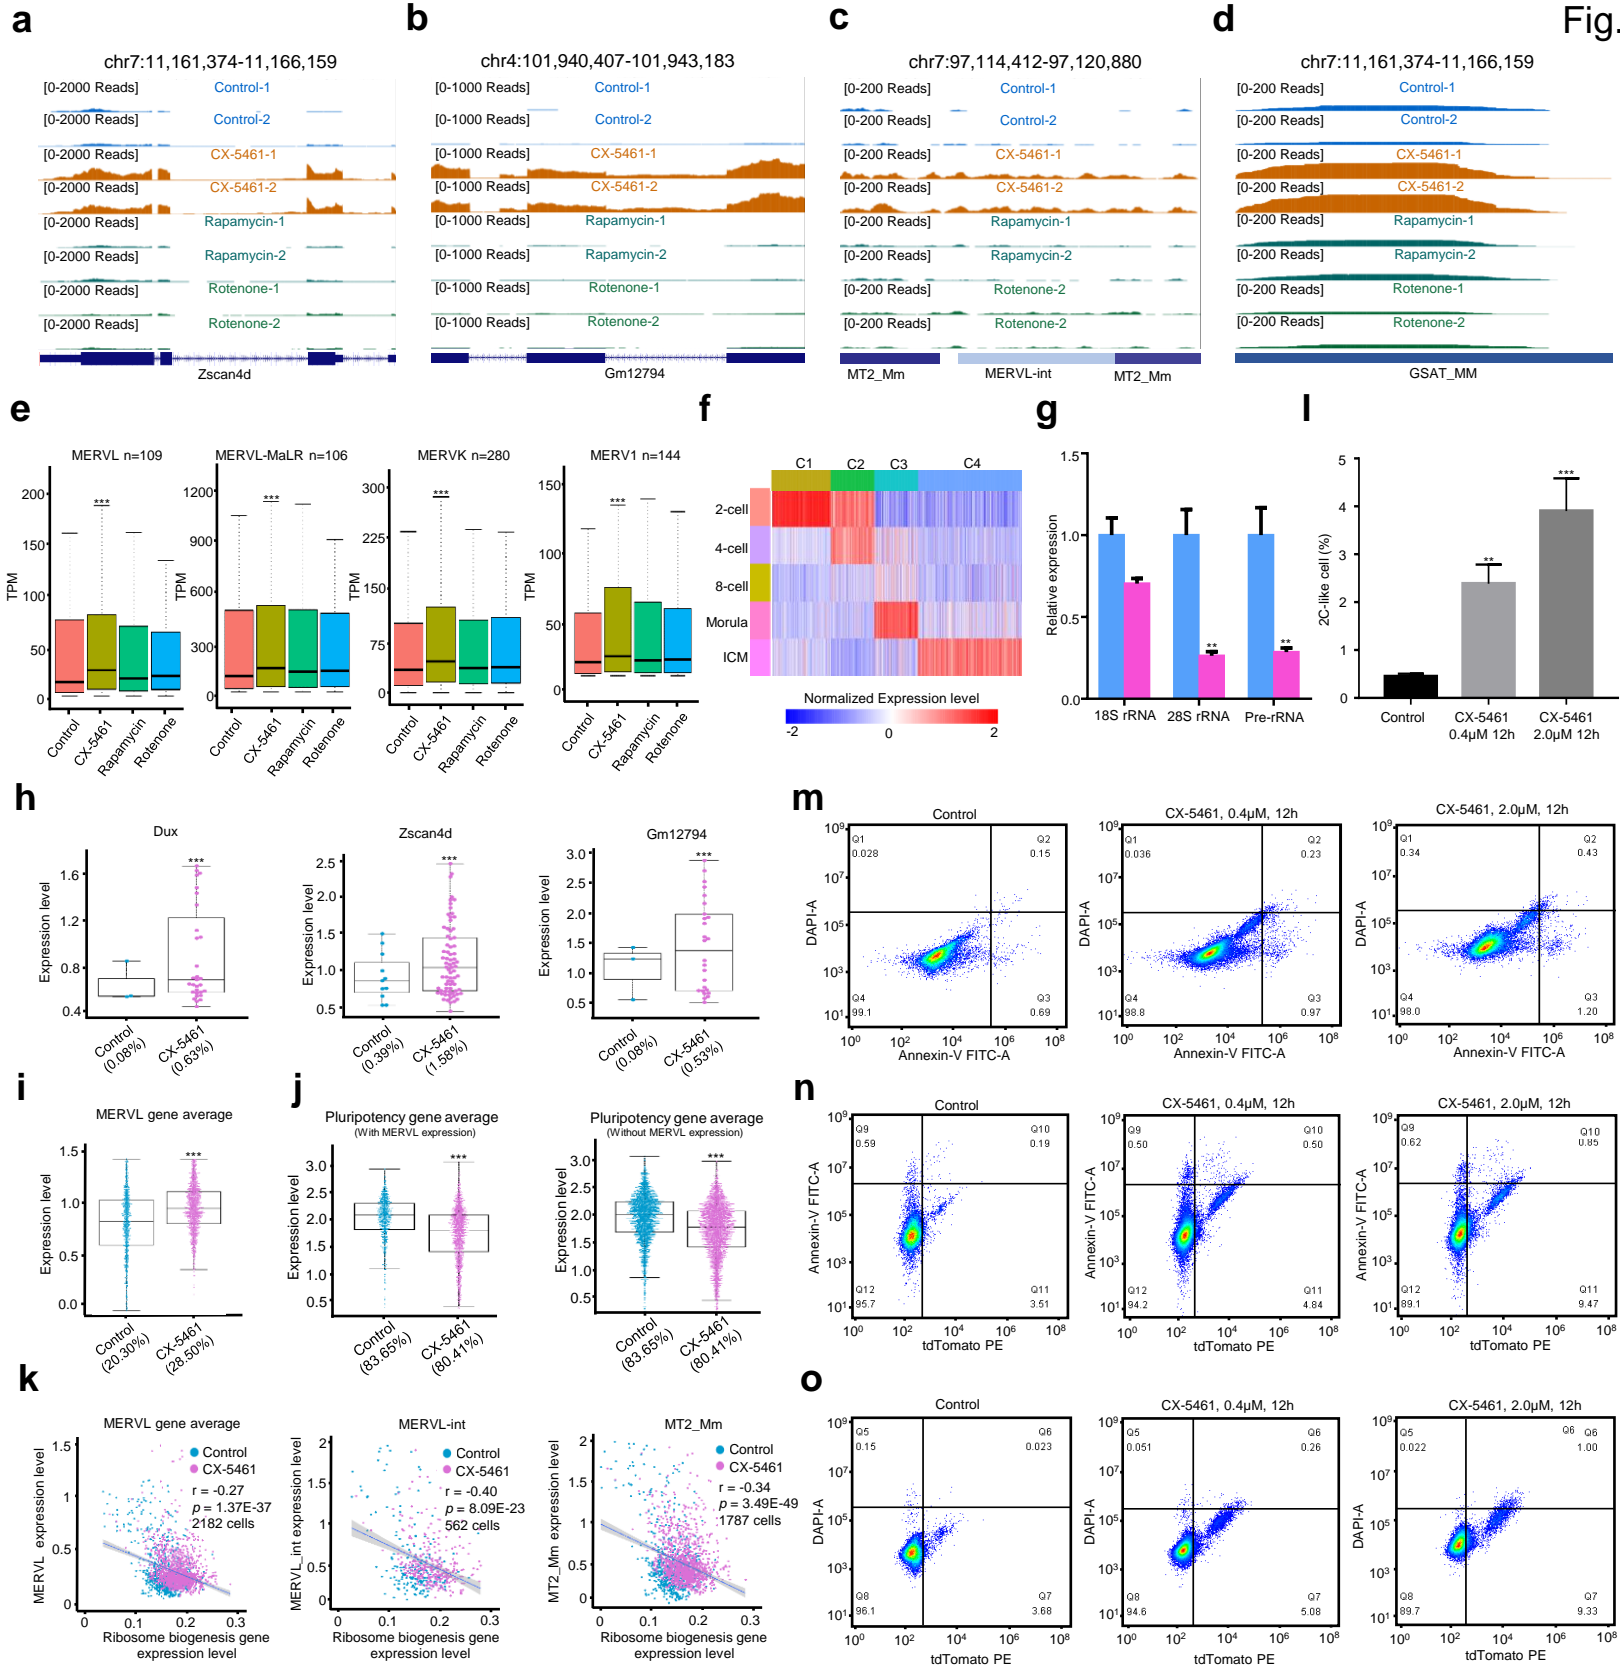

**Extended Data Fig.S1: Inhibition of rRNA biogenesis activated 2C-like transcriptional program and induced an expanded 2C-like cell population in mES cells, related to Fig.1.** **a)** UCSC Genome Browser viewing of RNA-sequencing results in *Zscan4d* gene locus (GEO accession GSE166041). **b)** UCSC Genome Browser viewing of RNA-sequencing results in *Gm12794* gene locus (GEO accession GSE166041). **c)** UCSC Genome Browser viewing of RNA-sequencing results in a representative ERV (*MERVL-int* and *MT2\_Mm*) gene locus (GEO accession GSE166041). **d)** UCSC Genome Browser viewing of RNA-sequencing results in a representative *GSAT\_MM* gene loci (GEO accession GSE166041). **e)** Boxplots show the expression levels of major ERV gene classes under different types of cellular stress treatment. n denotes the number of sub-classes of ERV genes, \*\*\*:  $p < 0.001$ , Wilcoxon signed rank test (GEO accession GSE166041). **f)** A heatmap plot demonstrating four developmental stage-specific gene clusters derived from RNA-seq data of pre-implantation mouse embryos (GEO accession GSE97778). **g)** qRT-PCR quantification of rRNA expression in control mES cells and CX-5461 treated mES cells, \*\*:  $p < 0.01$ , \*\*\*:  $p < 0.001$ , two-way ANOVA, the replicates of experiment  $n=3$ . **h)** Boxplots demonstrating the expression levels of 2C marker genes of *Dux*, *Zscan4d* and *Gm12794* in control mES cells and CX-5461 treated mES cells; Each point denoted a single cell; The number of parentheses denotes the percentage of cells expressing these genes; \*\*\*:  $p < 0.001$ , Wilcoxon signed rank test (GEO accession GSE166041). **i)** Boxplots demonstrating the averaged expression levels of *MERVL* genes in control mES cells and CX-5461 treated mES cells with single cell RNA-sequencing analysis; Each point denoted a single cell; The number of parentheses denotes the percentage of cells expressing *MERVL* genes; \*\*\*:  $p < 0.001$ , Wilcoxon signed rank test (GEO accession GSE166041). **j)** The expression levels of pluripotency genes in control mES cells and CX-5461 treated mES cells; Each point denoted a single cell; The number of parentheses denotes the percentage of cells expressing these genes; \*\*\*:  $p < 0.001$ , Wilcoxon signed rank test (GEO accession GSE166041). **k)** Scatter plots demonstrating negative correlation of expression level between *MERVL/MERVL-int/MT2\_Mm* and ribosome biogenesis genes; Each dot represents a single cell with detectable ERV expression;  $r$  denotes correlation coefficient;  $p$ -value was obtained by `cor.test` function in R software (GEO accession GSE166041). **l)** The percentage of 2C::tdTomato positive cells was quantified using FACS analysis in control mES cells and CX-5461-treated mES cells; Data are means  $\pm$  SD; SD: Standard Deviation; \*\*:  $p < 0.01$ , \*\*\*:  $p < 0.001$ , two-way ANOVA, the replicates of experiment  $n=5$ . **m)** FACS analysis on Annexin-V FITC, marker for early cell apoptosis,

and DAPI, marker for late cell apoptosis upon different treatment doses of CX-5461; **n)** FACS analysis on Annexin-V FITC and 2C::tdTomato positive mES cells upon different treatment doses of CX-5461. **o)** FACS analysis on DAPI and 2C::tdTomato positive mES cells upon different treatment doses of CX-5461.



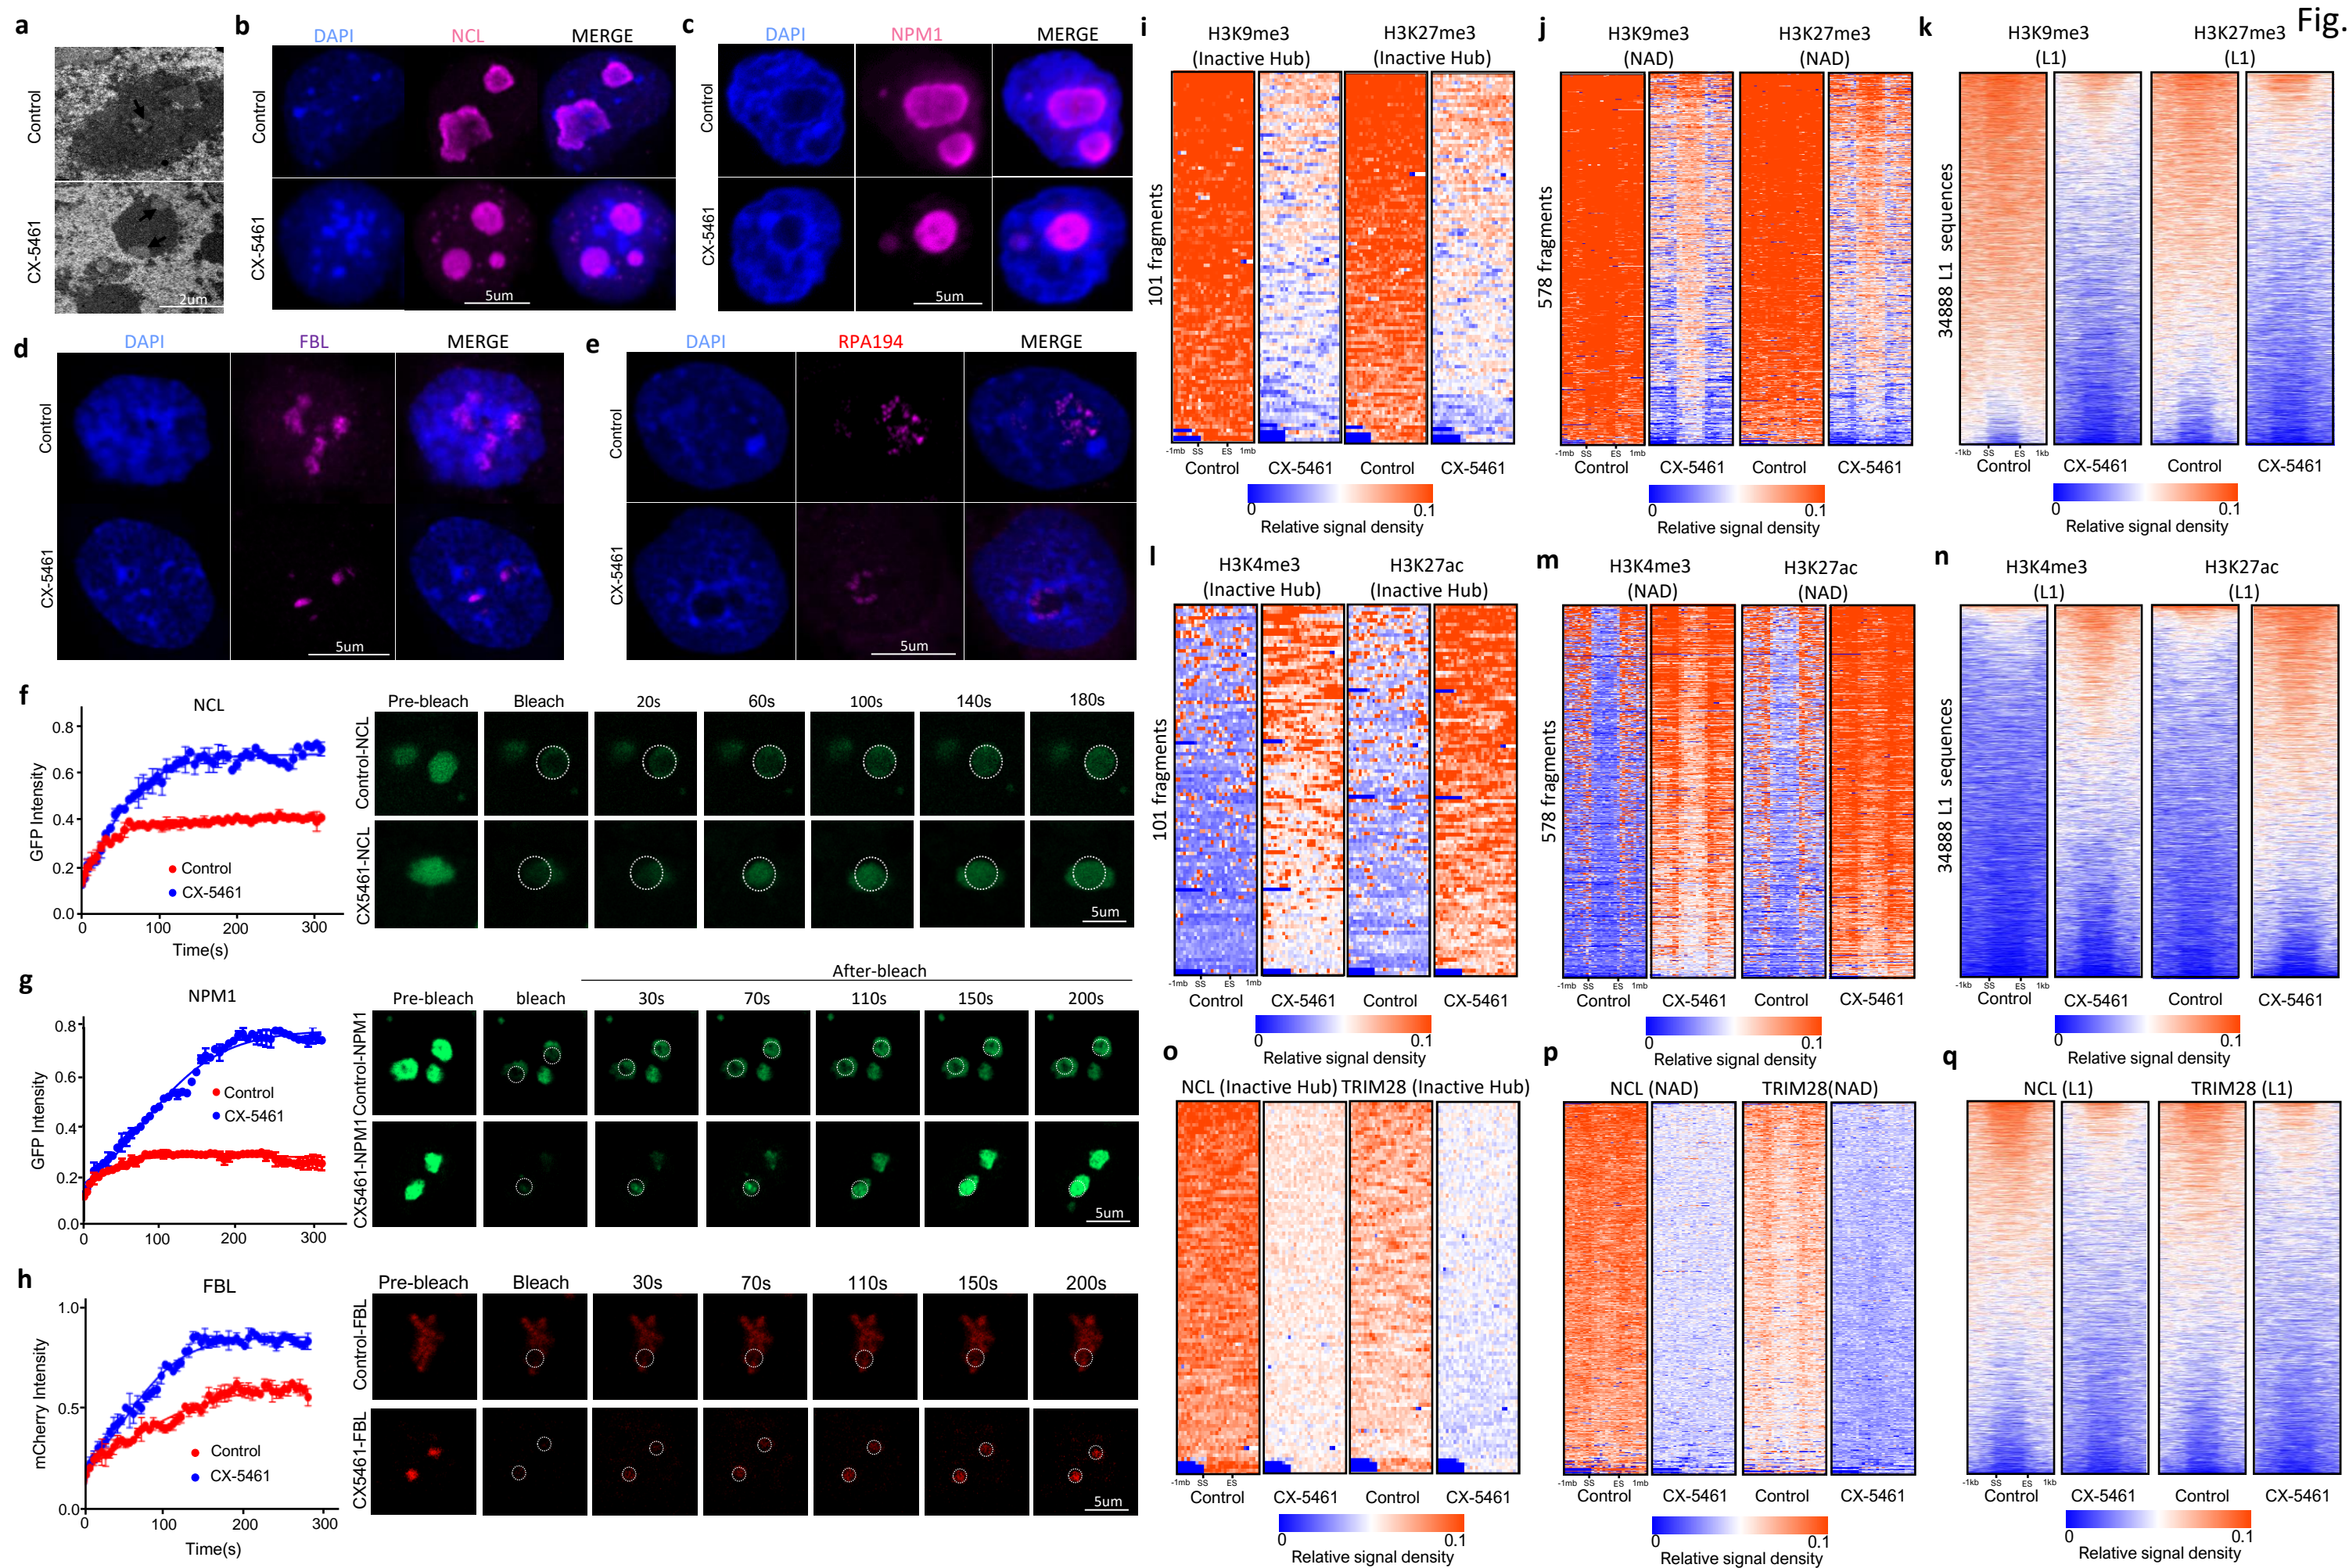

**Fig.2: Deficiency of rRNA biogenesis disrupted normal nucleolar LLPS and epigenetic state of PNH region.** **a)** CX-5461 treatment causes abnormal nucleolar structure with electron microscopy. **b)** Immunofluorescence staining of NCL in control mES cells and CX-5461-treated mES cells. **c)** Immunofluorescence staining of NPM1 in control mES cells and CX-5461-treated mES cells. **d)** Immunofluorescence staining of FBL in control mES cells and CX-5461 treated mES cells. **e)** Immunofluorescence staining of RPA194 in control and CX-5461 treated mES cells. **f)** FRAP analysis showing CX-5461 treatment causes accelerated recovery after photobleaching of NCL. Shown images are representative of 4 times of experiments. **g)** FRAP analysis showing CX-5461 treatment causes accelerated recovery after photobleaching of NPM1. Shown images are representative of 4 times of experiments. **h)** FRAP analysis showing CX-5461 treatment causes accelerated recovery after photobleaching of FBL. Shown images are representative of 4 times of experiments. **i)** Heatmap plots demonstrate the levels of H3K9me3 and H3K27me3 on within 1mb region around start and end sites of Inactive Hub. The regions of different lengths of Inactive Hub fragments were fitted to 1mb (GEO accession GSE166041). **j)** Heatmap plots demonstrate the levels of H3K9me3 and H3K27me3 within 1mb region around start and end sites of NAD. The regions of different lengths of NAD fragments were fitted to 1mb (GEO accession GSE166041). **k)** Heatmap plots demonstrate the levels of H3K9me3 and H3K27me3 within 1kb region around start and end sites of L1 (GEO accession GSE166041). The regions of different lengths of L1 sequences were fitted to 1kb. **l)** Heatmap plots demonstrate the level of H3K4me3 and H3K27ac within 1mb region around start and end sites of Inactive Hub (GEO accession GSE166041). The regions of different lengths of Inactive Hub fragments were fitted to 1mb. **m)** Heatmap plots demonstrate the levels of H3K4me3 and H3K27ac within 1mb region around start and end sites of NAD. The regions of different lengths of NAD fragments were fitted to 1mb (GEO accession GSE166041). **n)** Heatmap plots demonstrate the level of H3K4me3 and H3K27ac on within 1kb region around start and end sites of L1 (GEO accession GSE166041). The regions of different lengths of L1 sequences were fitted to 1kb. **o)** Heatmap plots demonstrate the level of NCL and TRIM28 within 1mb region around start and end sites of Inactive Hub (GEO accession GSE166041). The regions of different lengths of Inactive Hub fragments were fitted to 1mb. **p)** Heatmap plots demonstrate the levels of NCL and TRIM28 within 1mb region around start and end sites of NAD. The regions of different lengths of NAD fragments were fitted to 1mb (GEO accession GSE166041). **q)** Heatmap plots demonstrate the level of NCL

and TRIM28 within 1kb region around start and end sites of L1 (GEO accession GSE166041). The regions of different lengths of L1 sequences were fitted to 1kb.

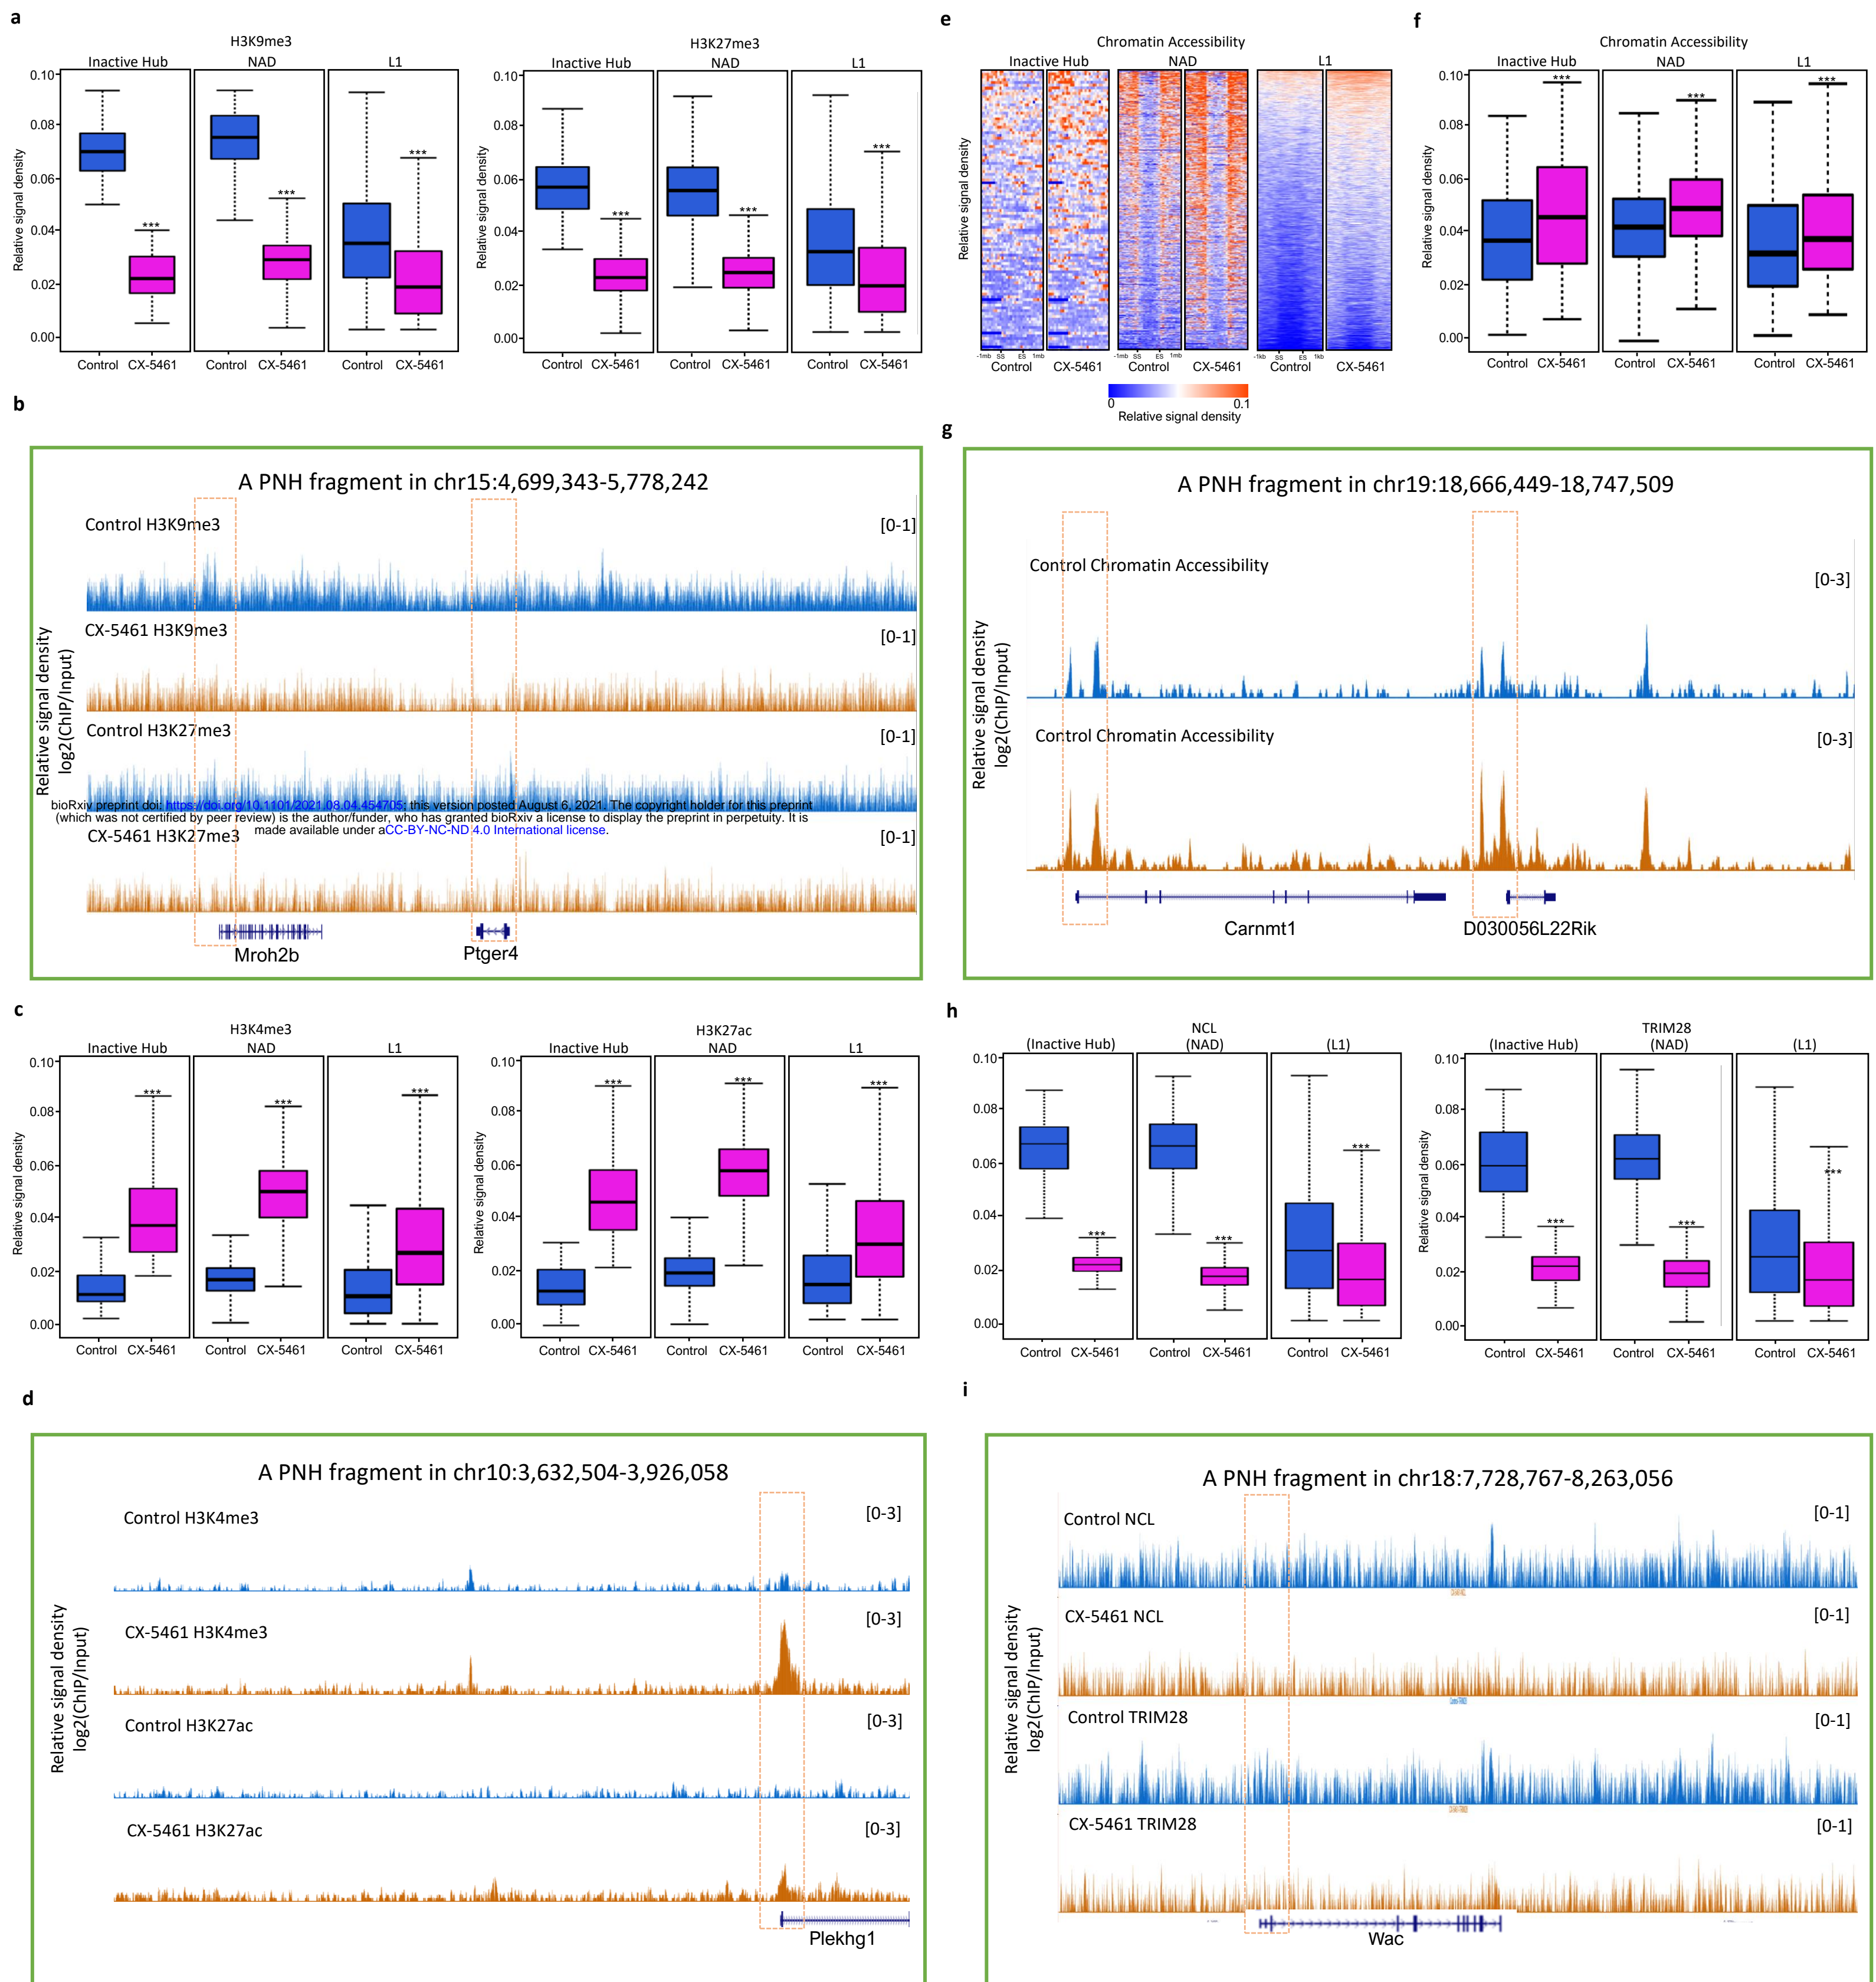

**Extended Data Fig.S2: Deficiency of rRNA biogenesis disrupted normal nucleolar LLPS and epigenetic state of PNH region, related to Fig.2.** **a)** Boxplots demonstrate the averaged H3K9me3 and H3K27me3 levels of 101 Inactive Hub fragments, 578 NAD fragments and 34888 L1 sequences; \*\*\*:  $p < 0.001$ , Wilcoxon signed rank test (GEO accession GSE166041). **b)** UCSC Genome Browser viewing of H3K9me3 and H3K27me3 ChIP-seq signals in control and CX-5461 treated mES cells around a representative PNH fragment at chr15:4,699,343-5,778,242 (GEO accession GSE166041). **c)** Boxplots demonstrate the averaged H3K4me3 and H3K27ac levels of 101 Inactive Hub fragments, 578 NAD fragments and 34888 L1 sequences; \*\*\*:  $p < 0.001$ , Wilcoxon signed rank test (GEO accession GSE166041). **d)** UCSC Genome Browser viewing of H3K4me3 and H3K27ac ChIP-seq signals in control mES cells and CX-5461 treated mES cells around a representative PNH fragment at chr10:3,632,504-3,926,058 (GEO accession GSE166041). **e)** Heatmap plots demonstrate the levels of chromatin accessibility on within 1mb region around start and end sites of Inactive Hub and NAD, and within 1kb region around start and end sites of L1 (GEO accession GSE166041). The regions of different lengths of Inactive Hub and NAD fragments were fitted to 1mb. The regions of different lengths of L1 sequences were fitted to 1kb. SS: start site of a chromatin fragment of PNH; ES: end site of a chromatin fragment of PNH. The PNH fragment was defined as the L1 contained regions overlapped with Inactive Hub and NAD. **f)** Boxplots demonstrate the averaged chromatin accessibility of 101 Inactive Hub fragments, 578 NAD fragments and 34888 L1 sequences; \*\*\*:  $p < 0.001$ , Wilcoxon signed rank test (GEO accession GSE166041). **g)** UCSC Genome Browser viewing of ATAC-seq signals in control and CX-5461 treated mES cells around a representative PNH fragment at chr19:18,666,449-18,747,509 (GEO accession GSE166041). **h)** Boxplots demonstrate the averaged binding signals of NCL and TRIM28 on 101 Inactive Hub fragments, 578 NAD fragments and 34888 L1 sequences; \*\*:  $p < 0.01$ , \*\*\*:  $p < 0.001$ , Wilcoxon signed rank test (GEO accession GSE166041). **i)** UCSC Genome Browser viewing of NCL and TRIM28 ChIP-seq signals in control and CX-5461 treated mES cells around a representative PNH fragment at chr18:7,718,063-8,074,255 (GEO accession GSE166041).

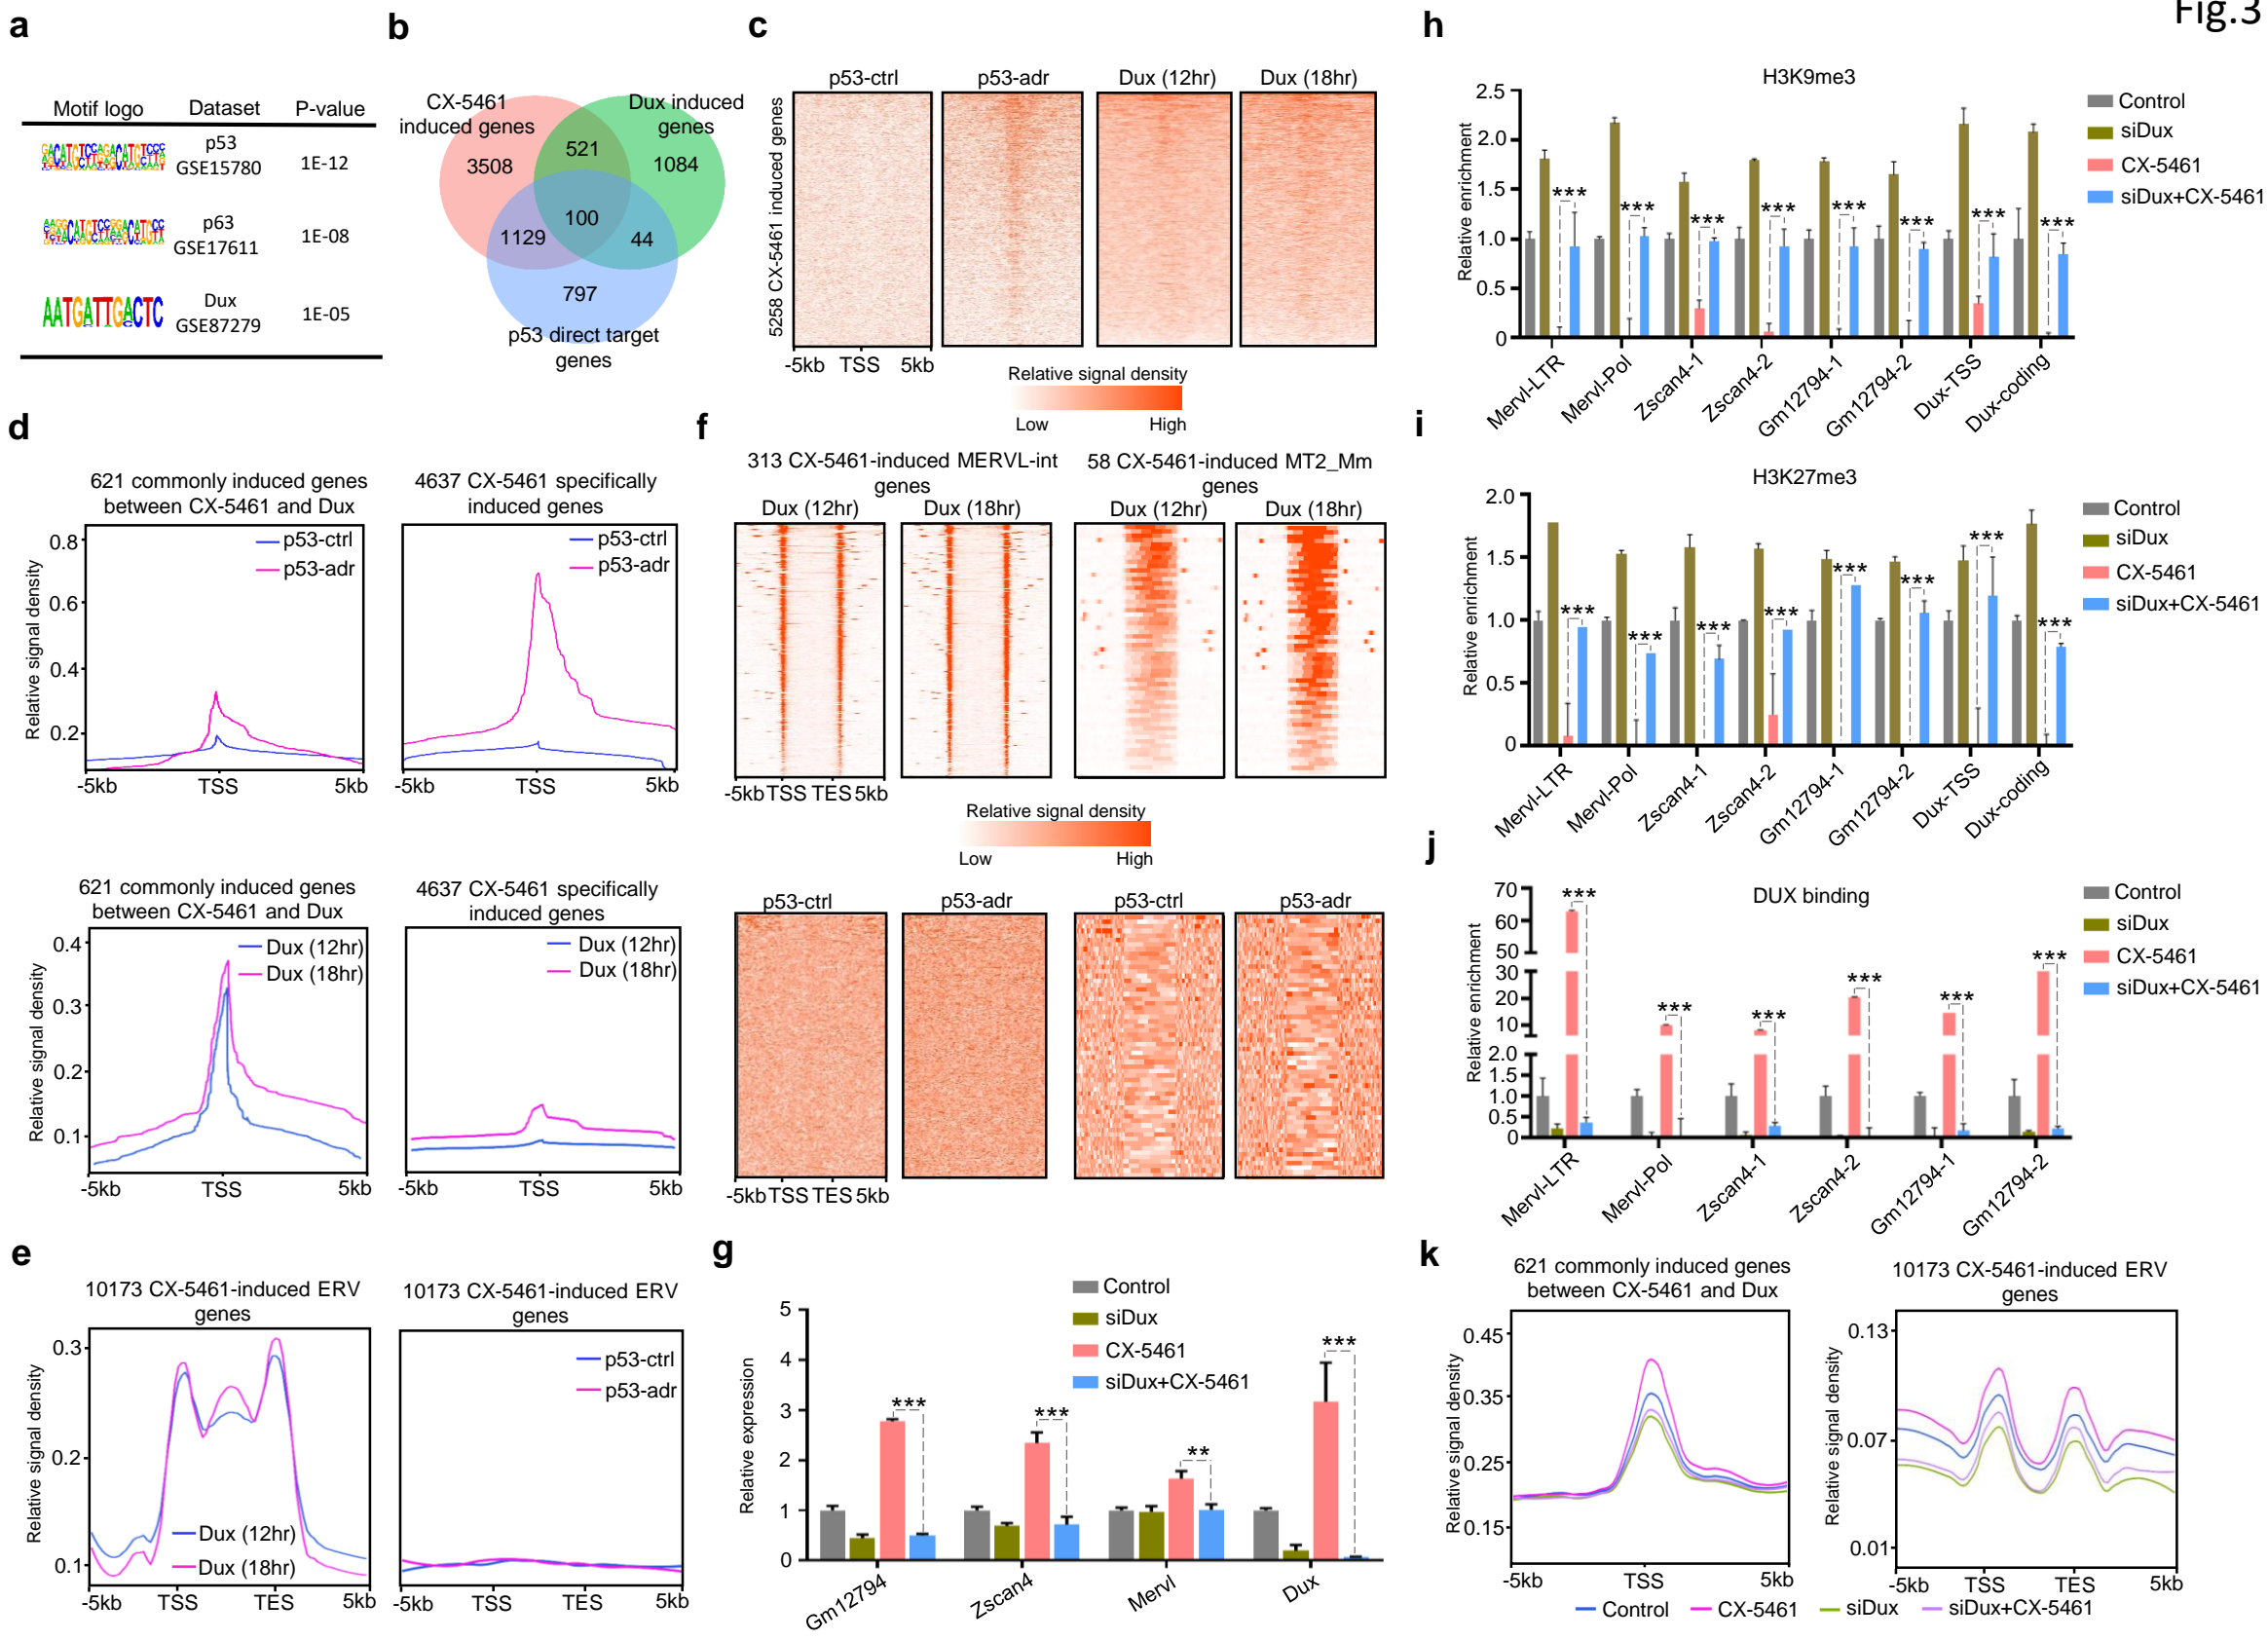

**Fig.3: 2C/ERV genes were activated through the Dux.** **a)** Enriched binding motifs of 5258 genes induced by CX-5461 treatment. **b)** Venn diagrams showing the overlap among CX-5461 treatment induced genes, p53 activated direct target genes and *Dux*-overexpression induced genes. **c)** Heatmap plots demonstrate the binding of p53 and Dux proteins on within 5kb region around transcription start sites of 5258 CX-5461 induced genes using published p53 ChIP-seq data and Dux ChIP-seq data (GEO accession GSE26360 for p53 and GEO accession GSE85632 for Dux). **d)** Line plots demonstrate the meta-analysis results of p53 and Dux protein on within 5kb region around transcription start sites of 621 commonly induced genes between CX-5461 treatment and *Dux* overexpression and 4637 specifically induced genes by CX-5461 using published p53 ChIP-seq data and Dux ChIP-seq data (GEO accession GSE26360 for p53 and GEO accession GSE85632 for Dux). **e)** Line plots demonstrate the meta-analysis results of p53 and Dux protein on within 5kb region around transcription start and end sites of 10173 CX-5461 induced ERV genes using published p53 ChIP-seq data and Dux ChIP-seq data. The regions of different lengths of gene body were fitted to 5kb (GEO accession GSE26360 for p53 and GEO accession GSE85632 for Dux). **f)** Heatmap plots demonstrate the binding of p53 and Dux proteins on within 5kb region around transcription start and end sites of 5258 CX-5461 induced *MERVL-int* and *MT2\_Mm* genes; The regions of different lengths of gene body were fitted to 5kb (GEO accession GSE26360 for p53 and GEO accession GSE85632 for Dux). **g)** qRT-PCR showing the expression of *Dux* or 2C-related genes in *Dux* silenced mES cells; \*\*:  $p < 0.01$ , \*\*\*:  $p < 0.001$ , two-way ANOVA, the replicates of experiment  $n=3$ ; error bar: standard error of the mean. **h)** ChIP-PCR showing H3K9me3 levels of *Dux* or 2C-related genes in *Dux* silenced mES cells; \*:  $p < 0.05$ , \*\*:  $p < 0.01$ , \*\*\*:  $p < 0.001$ , two-way ANOVA, the replicates of experiment  $n=3$ , error bar: standard error of mean. **i)** ChIP-PCR showing H3K27me3 levels of *Dux* or 2C-related genes in *Dux* silenced mES cells; \*:  $p < 0.05$ , \*\*:  $p < 0.01$ , \*\*\*:  $p < 0.001$ , two-way ANOVA, the replicates of experiment  $n=3$ , error bar: standard error of mean. **j)** ChIP-PCR showing DUX protein binding levels on 2C-related genes in *Dux* silenced mES cells; \*:  $p < 0.05$ , \*\*:  $p < 0.01$ , \*\*\*:  $p < 0.001$ , two-way ANOVA, the replicates of experiment  $n=3$ , error bar: standard error of mean. **k)**

Line plots demonstrate the meta-analysis results of chromatin accessibility in Dux silenced mES cells within 5kb region around transcription start sites or transcription start and end sites of 621 commonly induced genes between CX-5461 treatment and *Dux* overexpression and 10173 CX-5461 induced ERV genes using published ATAC-seq data. The regions of different lengths of ERV genes were fitted to 5kb (GEO accession GSE166041). p53-ctrl: untreated mES cells, p53-adr: mES cells treated with adriamycin, a DNA damage agent widely used to activate p53, Dux (12h): mES induced with doxycycline for 12 hours, Dux (18h): mES induced with doxycycline for 18 hours.



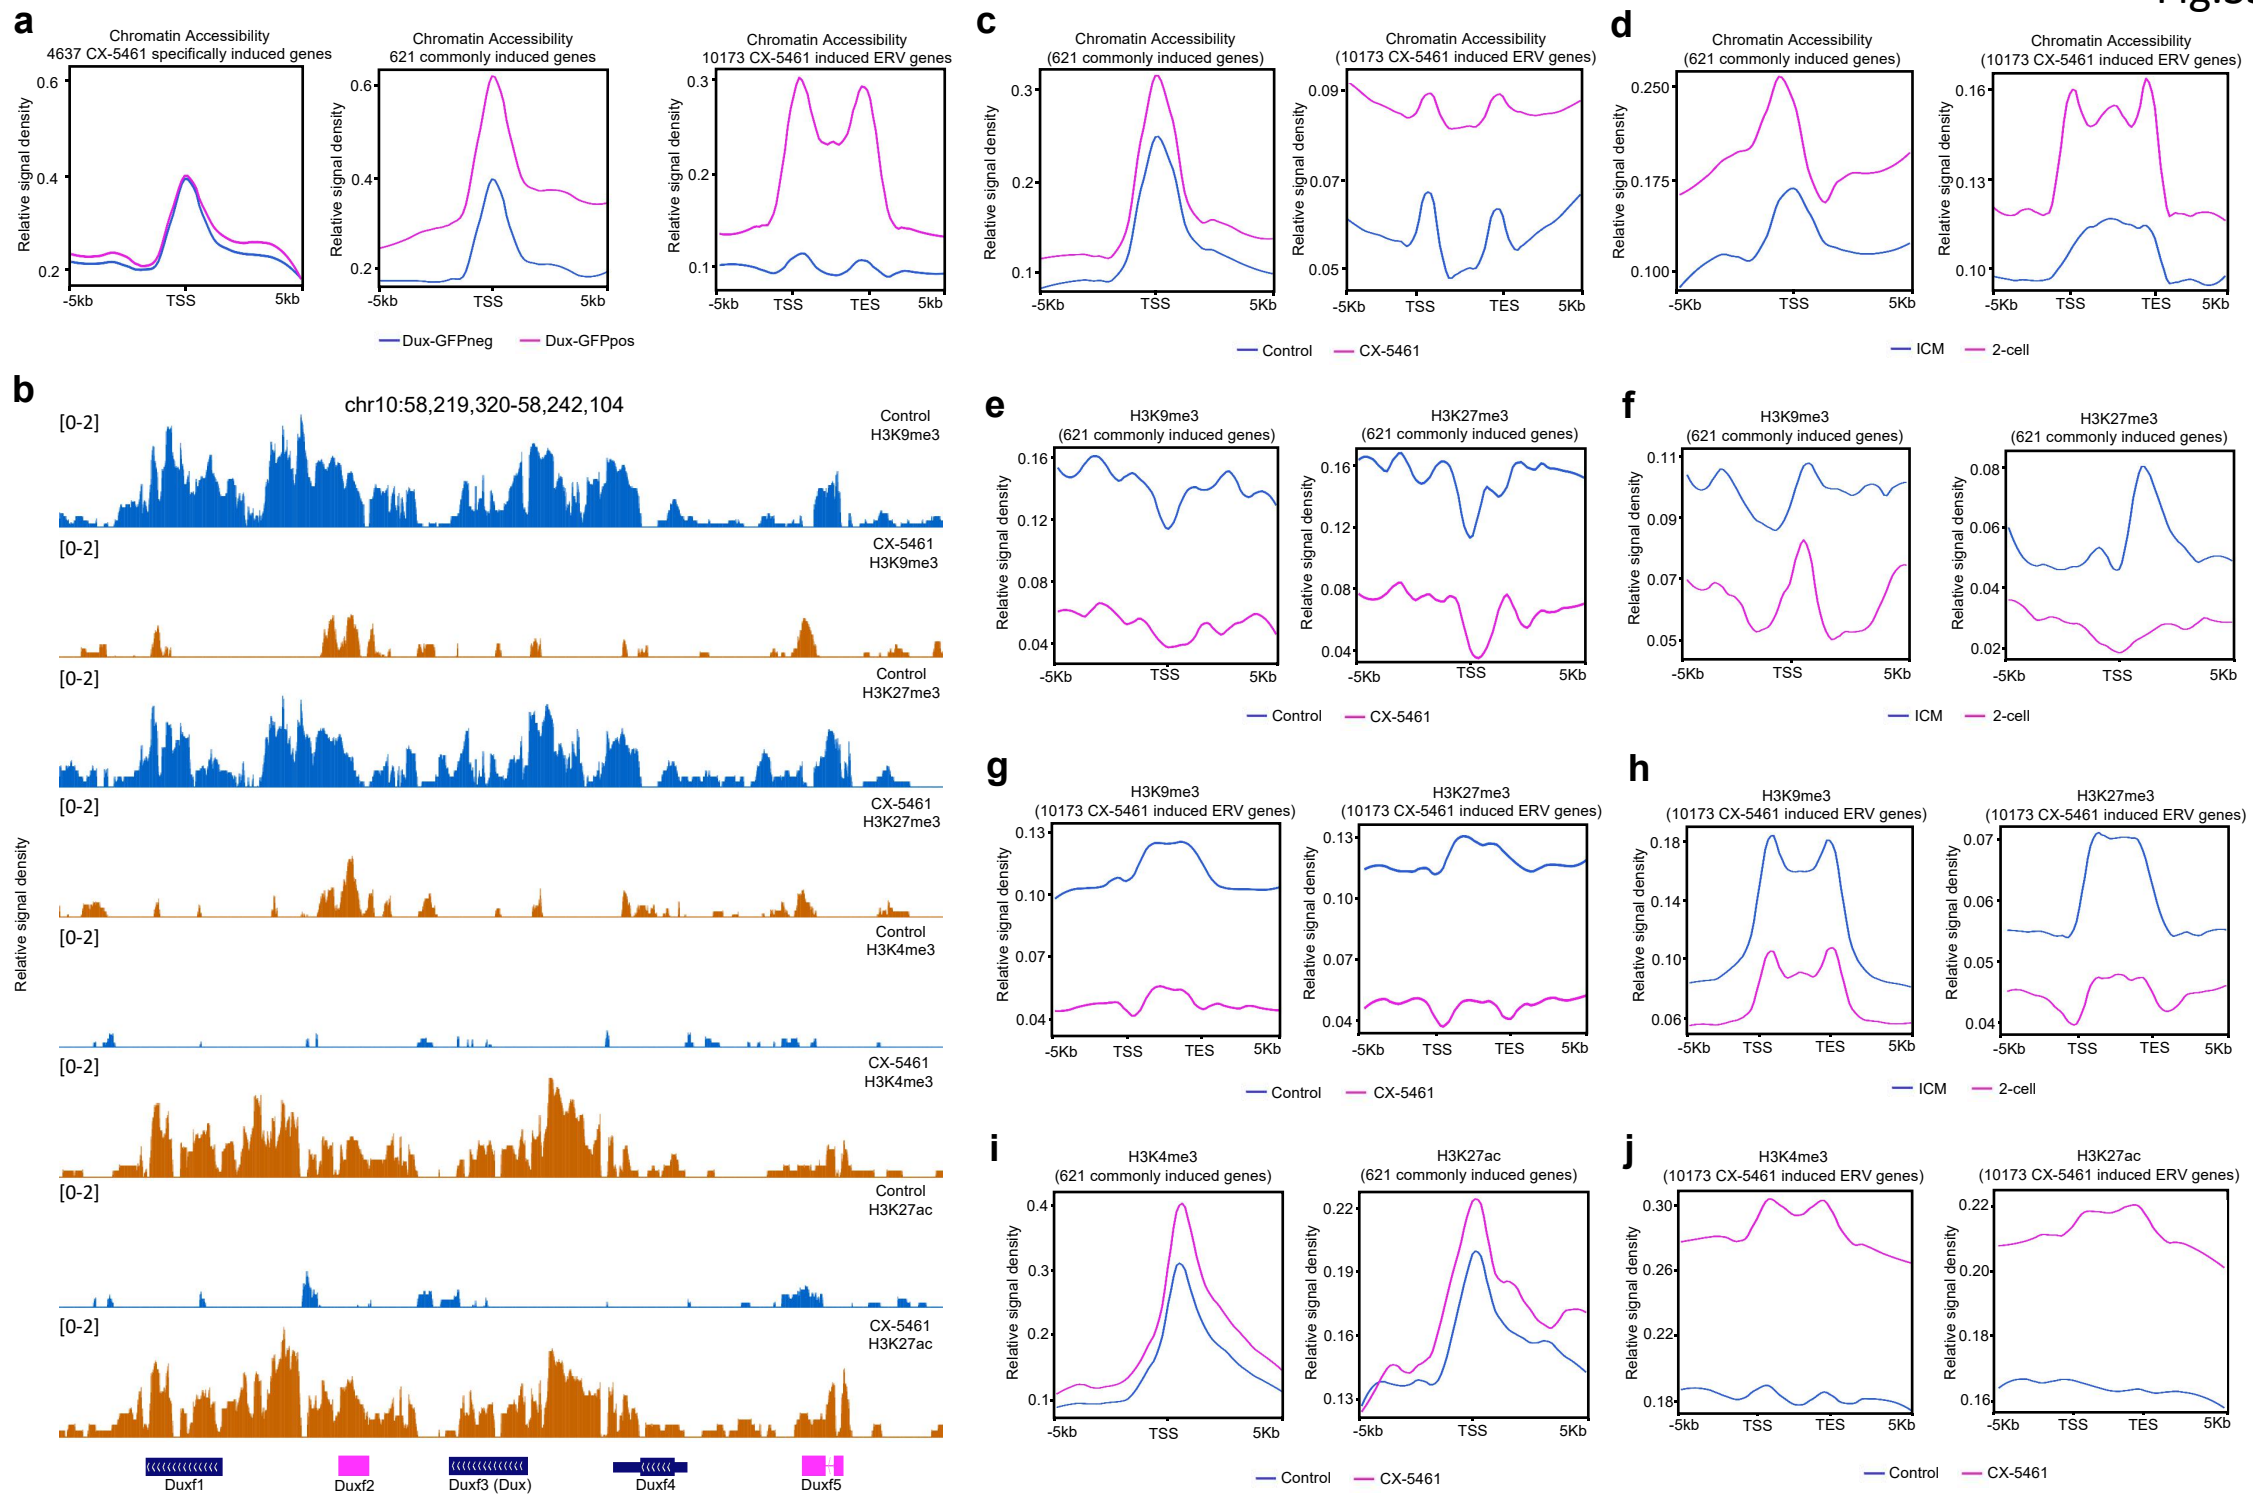

**Extended Data Fig.S3: 2C/ERV genes were activated through Dux, related to Fig.3.** **a)** Line plots demonstrate the meta-analysis results of chromatin accessibility in Dux-GFP positive mES cells and Dux-GFP negative mES cells within 5kb region around transcription start sites or transcription start and end sites of 621 commonly induced genes between CX-5461 treatment and *Dux* overexpression, 4637 specifically induced genes by CX-5461 and 10173 CX-5461 induced ERV genes using published ATAC-seq data. The regions of different lengths of ERV genes were fitted to 5kb (GEO accession GSE85632). **b)** UCSC Genome Browser viewing of ChIP-seq signals around *Dux* locus (GEO accession GSE166041). **c)** Line plots demonstrate the meta-analysis results of chromatin accessibility of 621 commonly induced genes between CX-5461 treatment and *Dux* overexpression and 10173 CX-5461 induced ERV genes in control mES cells and CX-5461 treated mES cells. The regions of different lengths of ERV genes were fitted to 5kb (GEO accession GSE166041). **d)** Line plots demonstrate the meta-analysis results of chromatin accessibility of 621 commonly induced genes between CX-5461 treatment and *Dux* overexpression and 10173 CX-5461 induced ERV genes in 2-cell embryo and ICM embryo. The regions of different lengths of ERV genes were fitted to 5kb (GEO accession GSE66390). **e)** Line plots demonstrates the meta-analysis results of H3K9me3 and H3K27me3 levels of 621 commonly induced genes between CX-5461 treatment and *Dux* overexpression in control mES cells and CX-5461 treated mES cells (GEO accession GSE166041). **f)** Line plots demonstrate the meta-analysis results of H3K9me3 and H3K27me3 levels of 621 commonly induced genes between CX-5461 treatment and *Dux* overexpression in 2-cell embryo and ICM embryo (GEO accession GSE66390). **g)** Line plots demonstrate the meta-analysis results of H3K9me3 and H3K27me3 levels of 10173 CX-5461 induced ERV genes in control mES cells and CX-5461 treated mES cells; The regions of different lengths of ERV genes were fitted to 5kb (GEO accession GSE166041). **h)** Line plots demonstrate the meta-analysis results of H3K9me3 and H3K27me3 levels of 10173 CX-5461 induced ERV genes in 2-cell embryo and ICM embryo; The regions of different lengths of ERV genes were fitted to 5kb (GEO accession GSE66390). **i)** Line plots demonstrate the meta-analysis results of H3K4me3 and H3K27ac levels of 621 commonly induced genes between CX-5461 treatment and *Dux* overexpression in control mES cells and CX-5461 treated mES cells (GEO accession GSE166041). **j)** Line plots demonstrate the meta-analysis results of H3K4me3 and H3K27ac levels of 10173 CX-5461 induced ERV genes in control mES cells and CX-5461 treated mES cells; The regions of different lengths of ERV genes were fitted to 5kb (GEO

accession GSE66390).

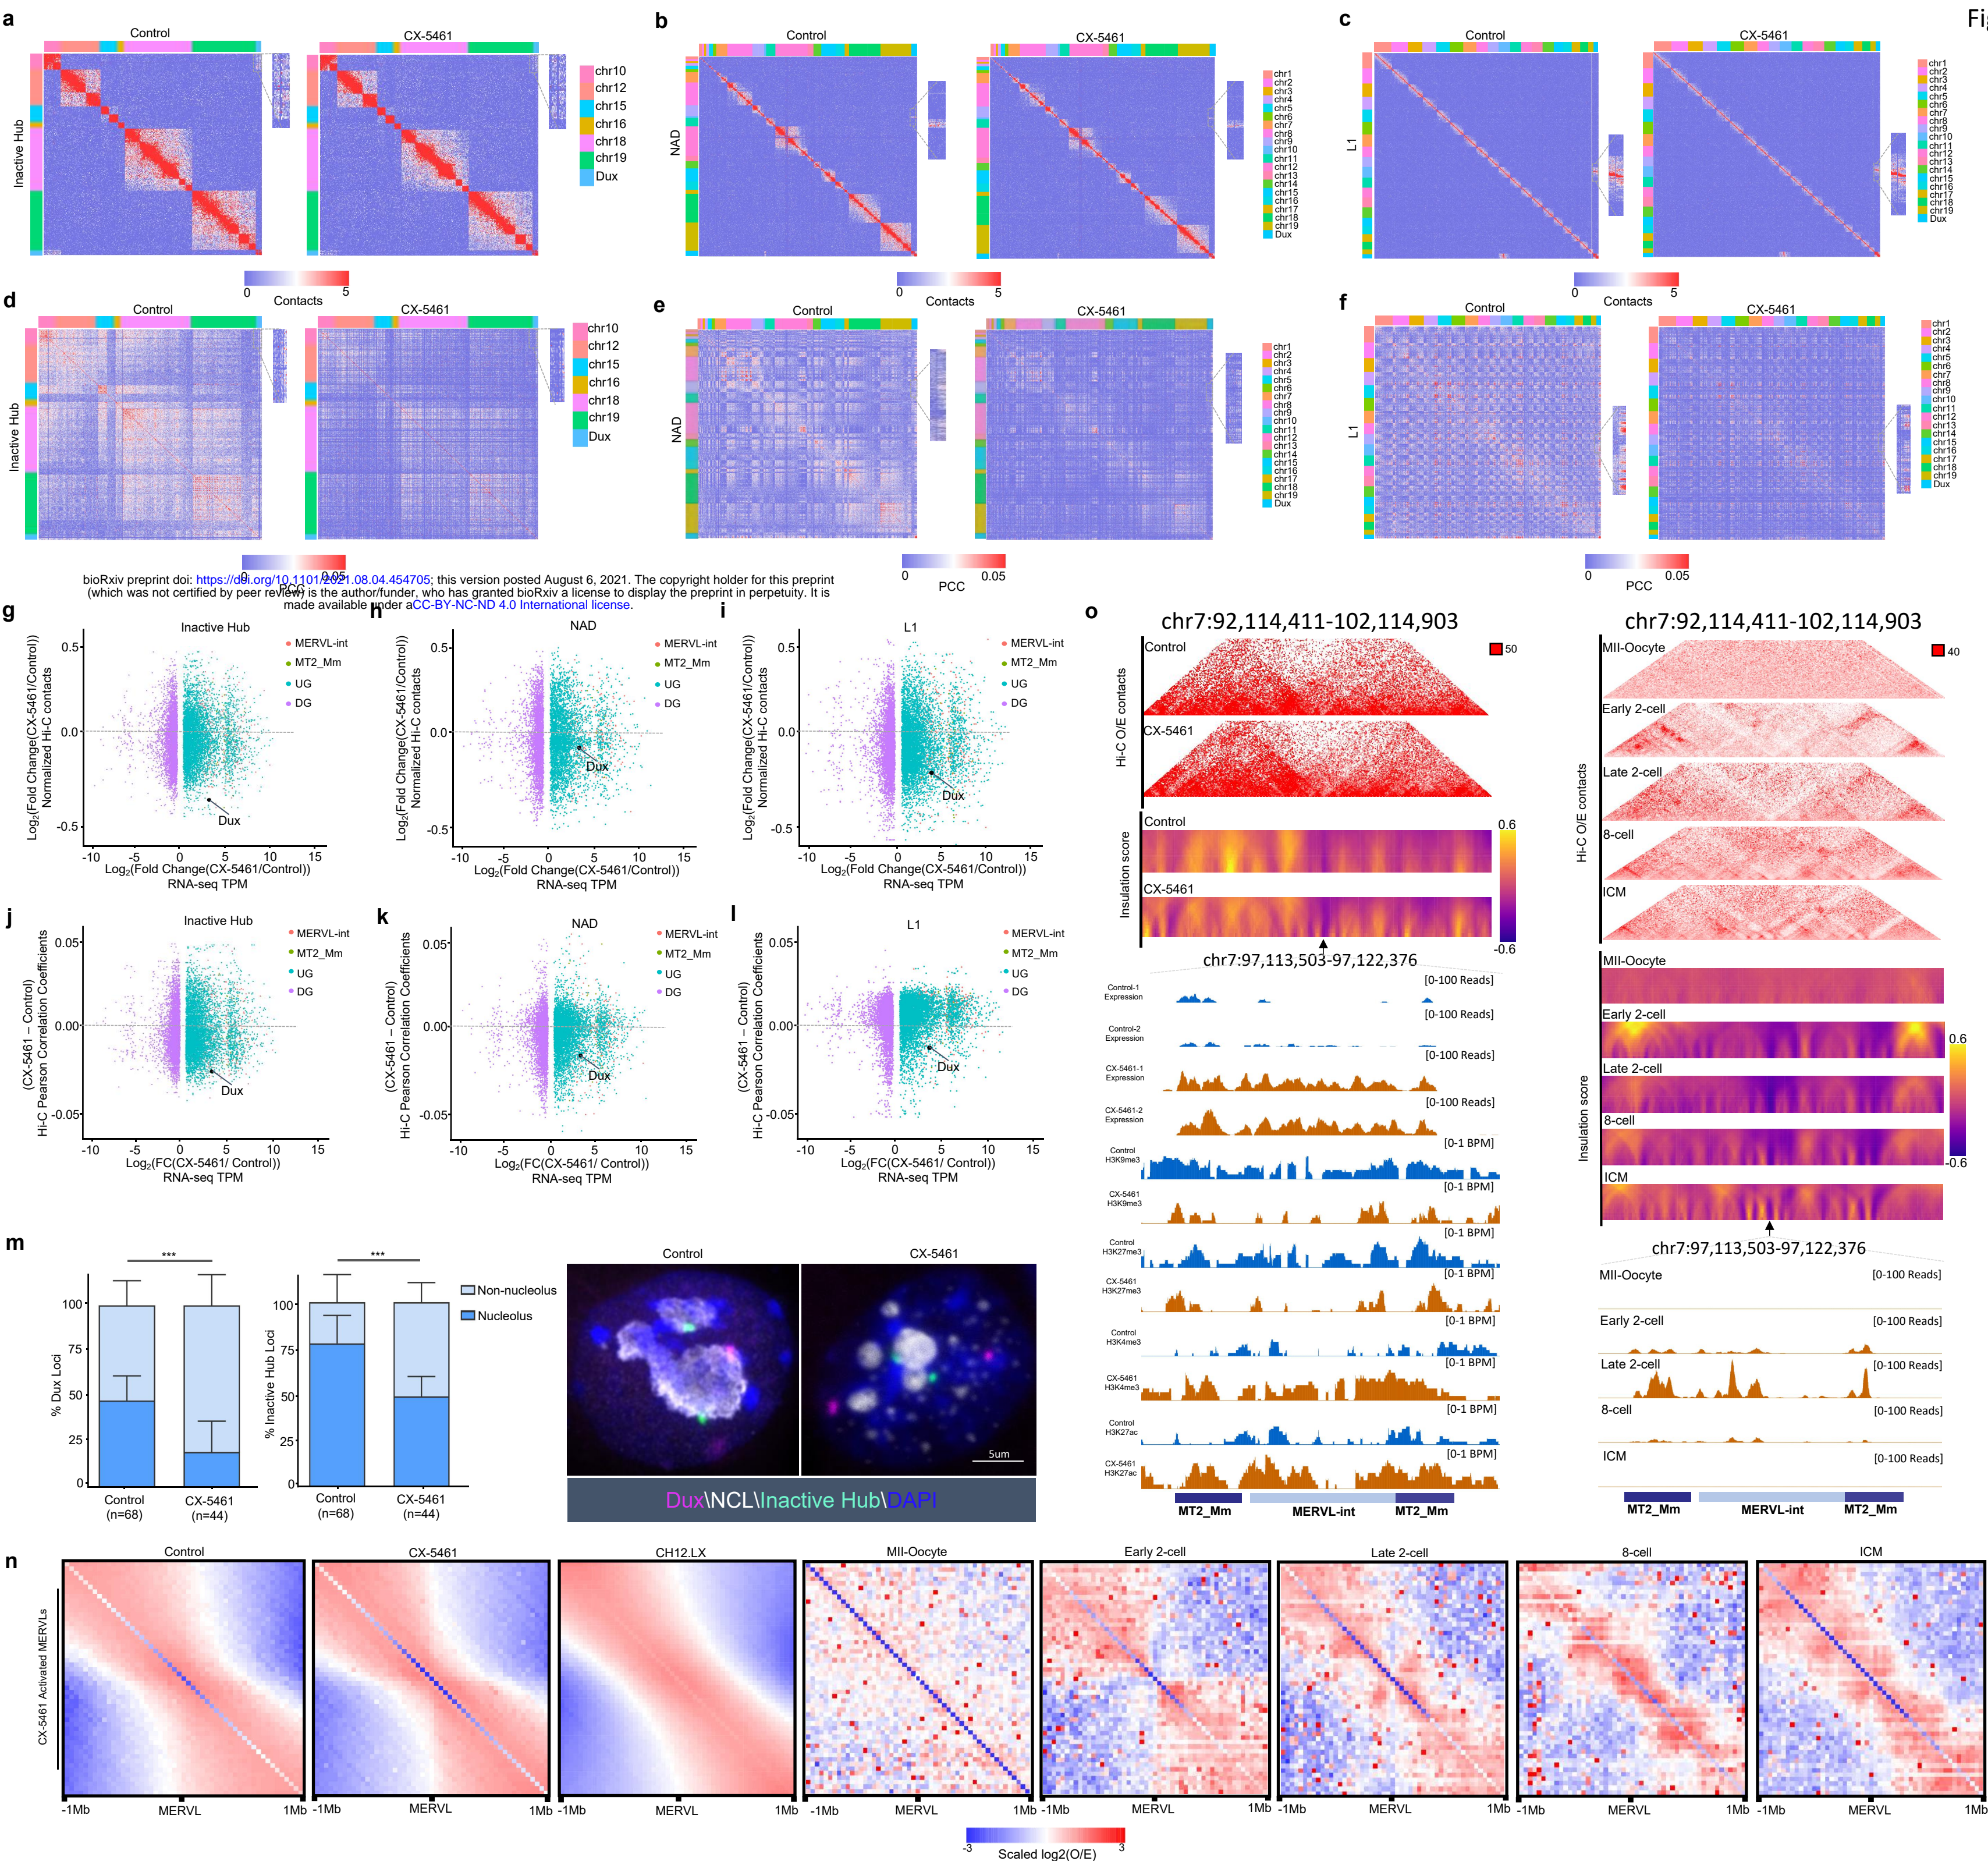

**Fig.4: rRNA biogenesis defect drove 3D chromatin structure reorganization of PNH and *MERVL* regions towards the 2C-like state.** **a)** Hi-C contact maps of Inactive Hub and 1.5 Mb genomic regions around *Dux* at 150kb resolution (GEO accession GSE166041). **b)** Hi-C contact maps of NAD and 1.5 Mb genomic regions around *Dux* at 150kb resolution (GEO accession GSE166041). **c)** Hi-C contact maps of L1 and 1.5 Mb genomic regions around *Dux* at 150kb resolution. The zoomed-in regions aim to demonstrate the change of Hi-C contacts between *Dux* and chromosome 10 in control mES cells and CX-5461 treated mES cells (GEO accession GSE166041). **d)** Hi-C pearson correlation coefficient (PCC) heat maps of Inactive Hub and 1.5Mb genomic regions around *Dux* at 150kb resolution (GEO accession GSE166041). **e)** Hi-C pearson correlation heat maps of NAD and 1.5Mb genomic regions around *Dux* at 150kb resolution (GEO accession GSE166041). **f)** Hi-C pearson correlation heat maps of L1 and 1.5Mb genomic regions around *Dux* at 150kb resolution. The zoomed-in regions aim to demonstrate the change of Hi-C PCC between *Dux* and chromosome 10 in control mES cells and CX-5461 treated mES cells (GEO accession GSE166041). **g)** Scatter plot demonstrates the  $\log_2(\text{fold change})$  of Hi-C contacts between Inactive Hub and different types of genes in control and CX-5461 treated mES cells (GEO accession GSE166041). **h)** Scatter plot demonstrates the  $\log_2(\text{fold change})$  of Hi-C contacts between NAD and different types of genes in control and CX-5461 treated mES cells (GEO accession GSE166041). **i)** Scatter plot demonstrates the  $\log_2(\text{fold change})$  of Hi-C contacts between L1 and different types of genes in control and CX-5461 treated mES cells (GEO accession GSE166041). **j)** Scatter plot demonstrates the PCC difference between Inactive Hub and different types of genes in control and CX-5461 treated mES cells (GEO accession GSE166041). **k)** Scatter plot demonstrates the PCC difference between NAD and different types of genes in control and CX-5461 treated mES cells (GEO accession GSE166041). **l)** Scatter plot demonstrates the PCC difference between L1 and different types of genes in control and CX-5461 treated mES cells. The difference of PCC is defined as the average (PCC) of Inactive Hub regions and different types of genes in CX-5461 treated mES cells minus the average PCC of Inactive Hub regions and different types of genes in wild type mES cells. PCC: Pearson Correlation Coefficient, *MERVL-int*: Up-regulated *MERVL-int* genes, *MT2\_Mm*: Up-regulated *MT2\_Mm* genes, UG: Up-regulated genes, DG: Down-regulated genes (GEO accession GSE166041). **m)** DNA FISH analysis with a *Dux* locus probe and Inactive Hub locus probe, and co-immunostained with NCL protein. The percentage of Nucleolus-localized (overlapped with NCL) and Nucleoplasm-localized

(nonoverlapped with NCL) of FISH signals is calculated. \*\*\*:  $p < 0.001$ , two-way ANOVA, error bar: standard error of the mean, n denotes the number of observed mES cells (GEO accession GSE166041). **n**) Aggregate Observed(O)/Expected(E) Hi-C matrices centered on CX-5461 induced *MERVL* genes in control ,CX-5461 treated mES cells (GEO accession GSE166041) and lymphoblastoid cells (GEO accession GSE63525) and mouse embryos throughout mouse pre-implantation embryonic development (GEO accession GSE82185). **o**) Representative 40kb Hi-C O/E interaction matrices of a *MERVL* loci located at TAD boundaries (chr7:97,113,503-97,122,376) are shown as heatmaps, along with the insulation score and genome browser tracks of RNA-Seq, H3K9me3, H3K27me3, H3K4me3 and H3K27ac ChIP-Seq signals of the expanded genomic region containing the TAD boundary (arrows) in control and CX-5461 treated mES cells as well as in mouse early embryos (GEO accession GSE166041 and GSE82185).

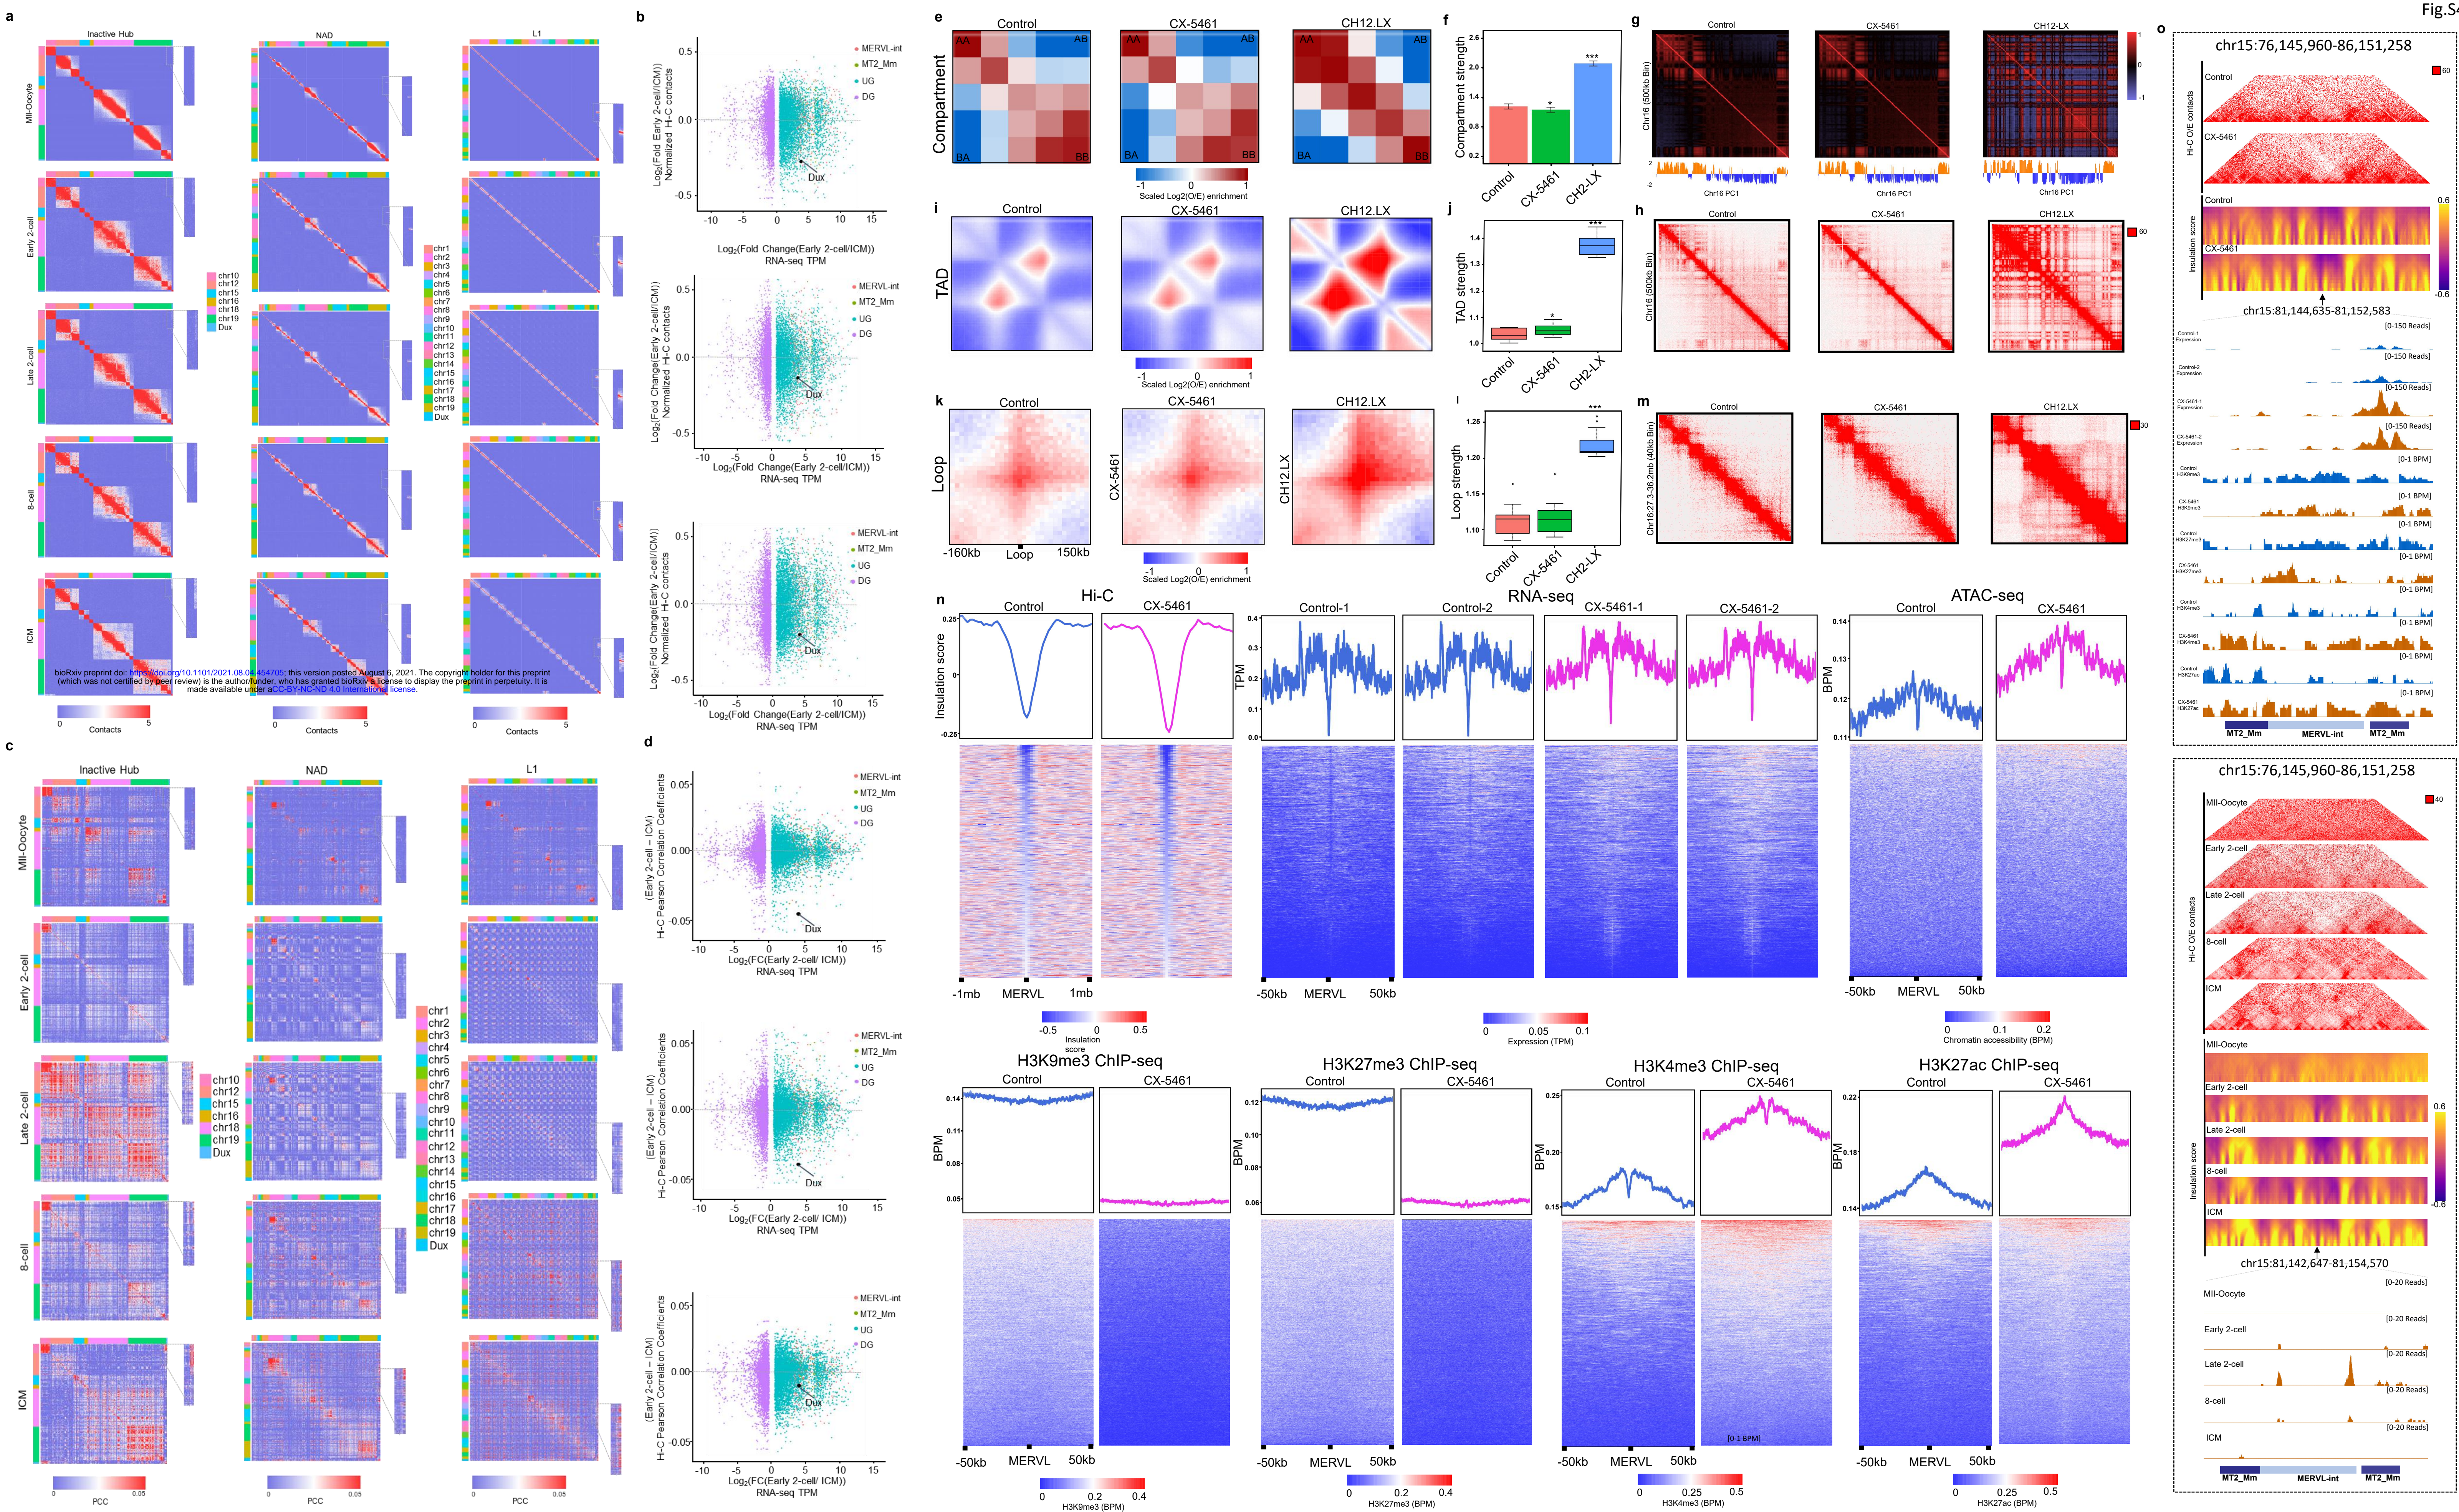

bioRxiv preprint doi: <https://doi.org/10.1101/2021.08.06.454705>; this version posted August 6, 2021. The copyright holder for this preprint (which was not certified by peer review) is the author/funder, who has granted bioRxiv a license to display the preprint in perpetuity. It is made available under aCC-BY-NC-ND 4.0 International license.

**Extended Data Fig.S4: rRNA biogenesis defect drove 3D chromatin structure reorganization of PNH and MERVL regions towards the 2C-like state, related to Fig.4.** **a)** Hi-C contact maps of Inactive Hub/NAD/L1 and 1.5 Mb genomic regions around *Dux* at 150kb resolution during mouse pre-implantation embryos development. The zoomed-in regions aim to demonstrate the change of Hi-C contacts between *Dux* and chromosome 10 during mouse pre-implantation embryos development (GEO accession GSE82185). **b)** Scatter plot demonstrates the  $\log_2$ (fold change) of Hi-C contacts between Inactive Hub/NAD/L1 and different types of genes in early 2-cell and ICM stage embryos (GEO accession GSE82185). **c)** Hi-C pearson correlation heat maps of Inactive Hub/NAD/L1 and 1.5 Mb genomic regions around *Dux* at 150kb resolution during mouse pre-implantation embryos development. The zoomed-in regions aim to demonstrate the change of Hi-C PCC between *Dux* and chromosome 10 during mouse pre-implantation embryos development (GEO accession GSE82185). **d)** Scatter plot demonstrates the PCC difference between Inactive Hub/NAD/L1 and different types of genes in early 2-cell and ICM stage embryos (GEO accession GSE82185). **e)** A/B interaction profile showing contact enrichment between active and inactive compartments (GEO accession GSE166041 and GSE63525). **f)** Quantification of compartment strength; \*:  $p < 0.05$ , \*\*\*:  $p < 0.001$ , Wilcox signed rank test. **g)** Pearson correlation heat maps for chromosome 16 at 500kb resolution to demonstrate A/B compartment (GEO accession GSE166041 and GSE63525). **h)** Hi-C contact maps for chromosome 16 at 500kb resolution for A/B compartment profile. **i)** Observed/Expected (O/E) aggregate plot of TADs (GEO accession GSE166041 and GSE63525). **j)** Quantification of TAD strength; \*:  $p < 0.05$ , \*\*\*:  $p < 0.001$ , Wilcox signed rank test (GEO accession GSE166041 and GSE63525). **k)** O/E aggregate plots of chromatin loops (GEO accession GSE166041 and GSE63525). **l)** Quantification of loop strength; \*\*\*:  $p < 0.001$ , Wilcox signed rank test (GEO accession GSE166041 and GSE63525). **m)** Hi-C contact maps for chromosome 16:27.3-36.2mb region at 40kb resolution to demonstrate TAD and chromatin loop (GEO accession GSE166041 and GSE63525). **n)** Insulation score, expression (TPM), ATAC-seq (BPM), H3K9me3 (BPM), H3K27me3 (BPM), H3K4me3 (BPM) and H3K27ac (BPM) signals of control and CX-5461-treated mES cells centered on CX-5461-induced *MERVL* genes (GEO accession GSE166041). **o)** Representative 40kb Hi-C O/E interaction matrices of a *MERVL* loci (chr15:76,145,960-86,151,258) located at TAD boundaries are shown as heatmaps, along with insulation score and genome browser tracks of RNA-Seq, H3K9me3, H3K27me3, H3K4me3 and H3K27ac ChIP-Seq signals of the



expanded genomic region containing the TAD boundary (arrows) in control and CX-5461-treated mES cells as well as in mouse early embryos (GEO accession GSE166041).

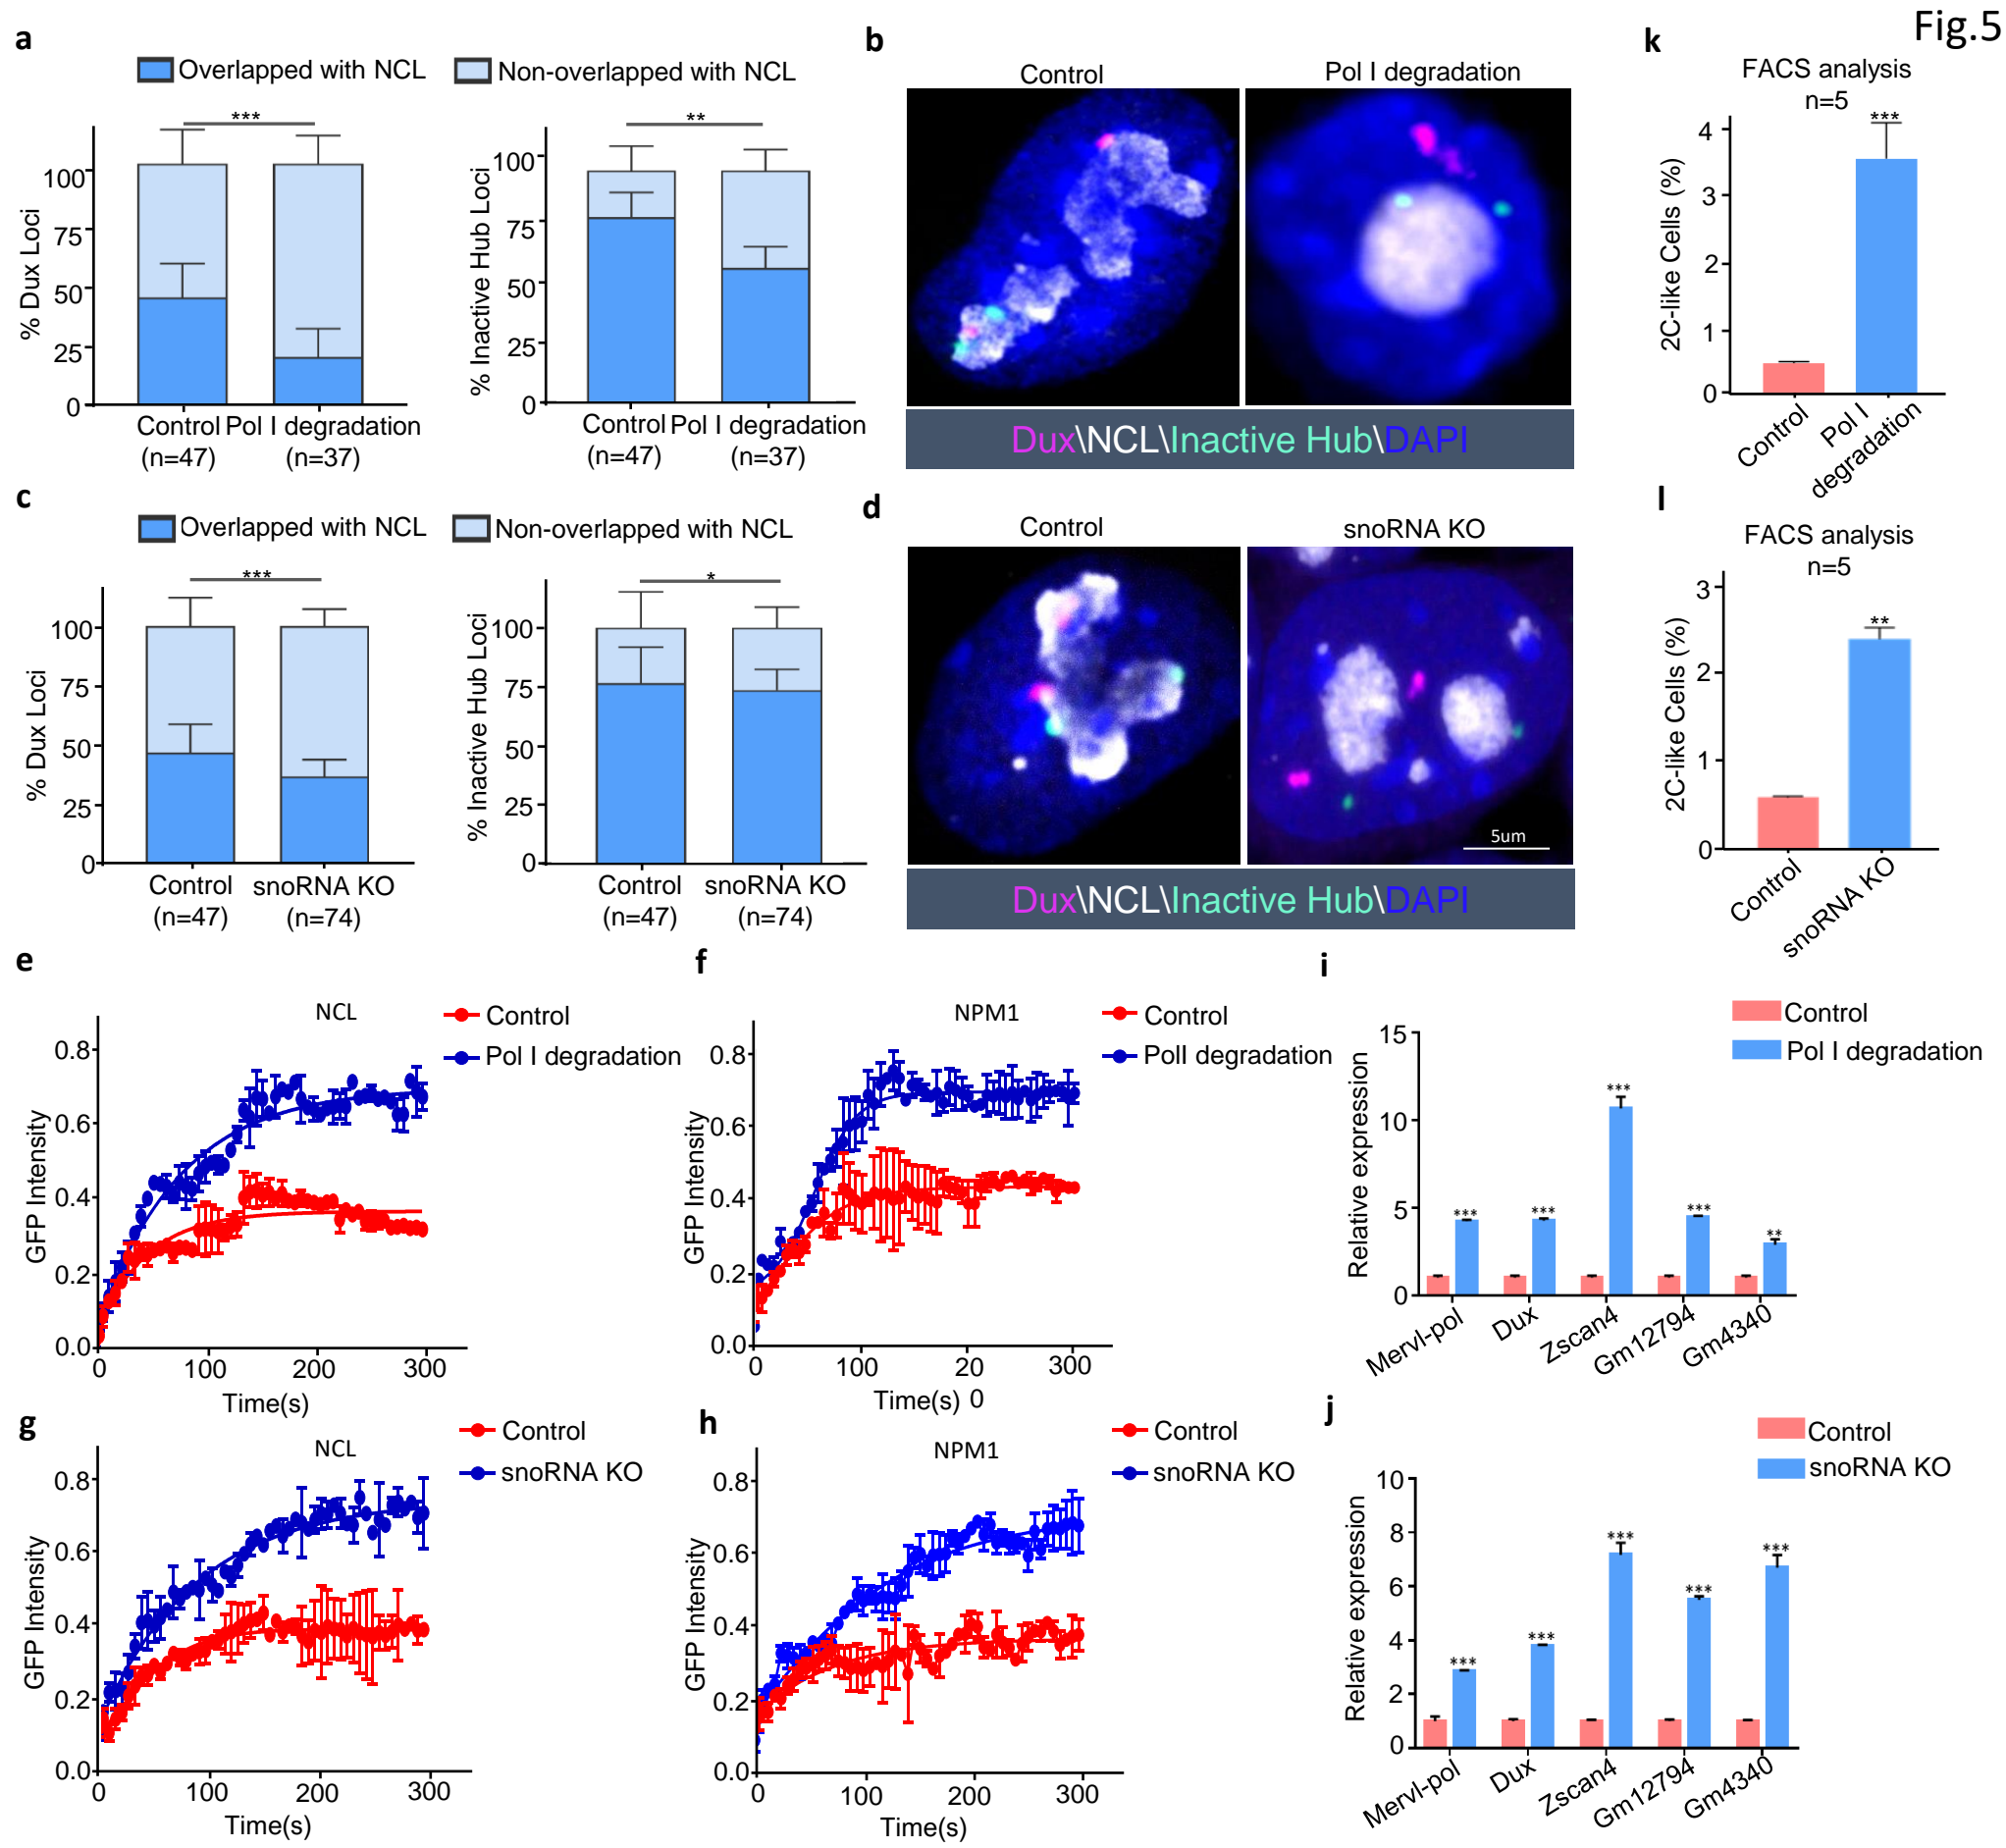

**Fig.5: Genetic interferences of rRNA biogenesis recapitulate CX-5461-induced 2C-like molecular phenotypes.** **a)** The percentage of Nucleolus-localized (overlapped with NCL) and Nucleoplasm-localized (nonoverlapped with NCL) of FISH signals in control and Pol I degradation mES cell lines; \*\*: p<0.01, \*\*\*: p<0.001, two-way ANOVA, error bar: standard error of the mean, n denotes the number of observed mES cells. **b)** Representative images demonstrating DNA FISH analysis with a *Dux* locus probe and Inactive Hub locus probe, and co-immunostained with NCL protein in control and Pol I degradation mES cell lines. **c)** The percentage of Nucleolus-localized (overlapped with NCL) and Nucleoplasm-localized (nonoverlapped with NCL) of FISH signals in control and snoRNA knockout mES cell lines; \*: p<0.05, \*\*\*: p<0.001, two-way ANOVA, error bar: standard error of the mean, n denotes the number of observed mES cells. **d)** Representative images demonstrating DNA FISH analysis with a *Dux* locus probe and Inactive Hub locus probe, and co-immunostained with NCL protein in control and snoRNA knockout mES cell lines. **e)** FRAP analysis showing Pol I degradation causes accelerated recovery after photobleaching of NCL, the replicates of experiment n = 4. **f)** FRAP analysis showing Pol I degradation causes accelerated recovery after photobleaching of NPM1, the replicates of experiment n = 4. **g)** FRAP analysis showing snoRNA knockout causes accelerated recovery after photobleaching of NCL, the replicates of experiment n = 4. **h)** FRAP analysis showing snoRNA knockout causes accelerated recovery after photobleaching of NPM1, the replicates of experiment n = 4. **i)** qRT-PCR quantification of 2C marker gene expression in control mES cells and Pol I degraded mES cell lines; \*\*: p<0.01, \*\*\*: p<0.001, two-way ANOVA, the replicates of experiment n=3; error bar: standard error of the mean. **j)** qRT-PCR quantification of 2C marker gene expression in control mES cells and snoRNA knockout mES cell lines; \*\*: p<0.01, \*\*\*: p<0.001, two-way ANOVA, the replicates of experiment n=3; error bar: standard error of the mean. **k)** The percentage of 2C::tdTomato positive cells was quantified using FACS analysis in control mES cells and Pol I degraded mES cells; Data are means  $\pm$  SD, SD: Standard Deviation, \*\*\*: p<0.001, two-way ANOVA, the replicates of experiment n=5. **l)** The percentage of 2C::tdTomato positive cells was quantified using FACS analysis in control mES cells and snoRNA knockout mES cells; Data are means  $\pm$  SD, SD: Standard Deviation, \*\*: p<0.01, two-way ANOVA, the replicates of experiment n=5.

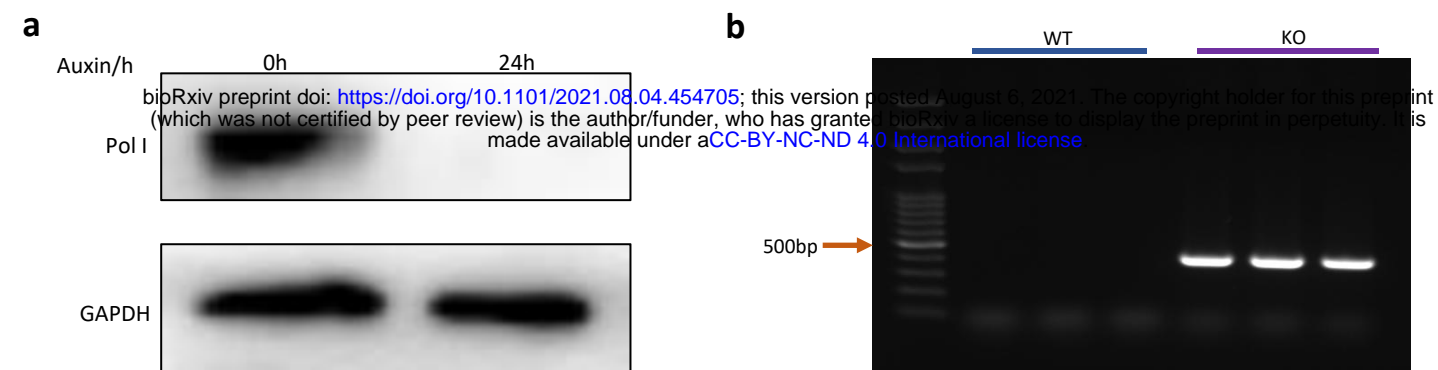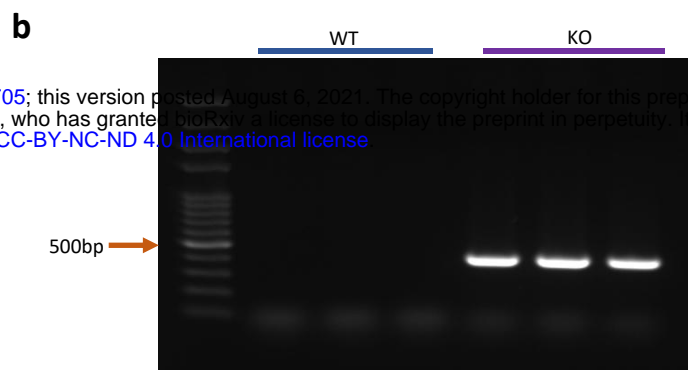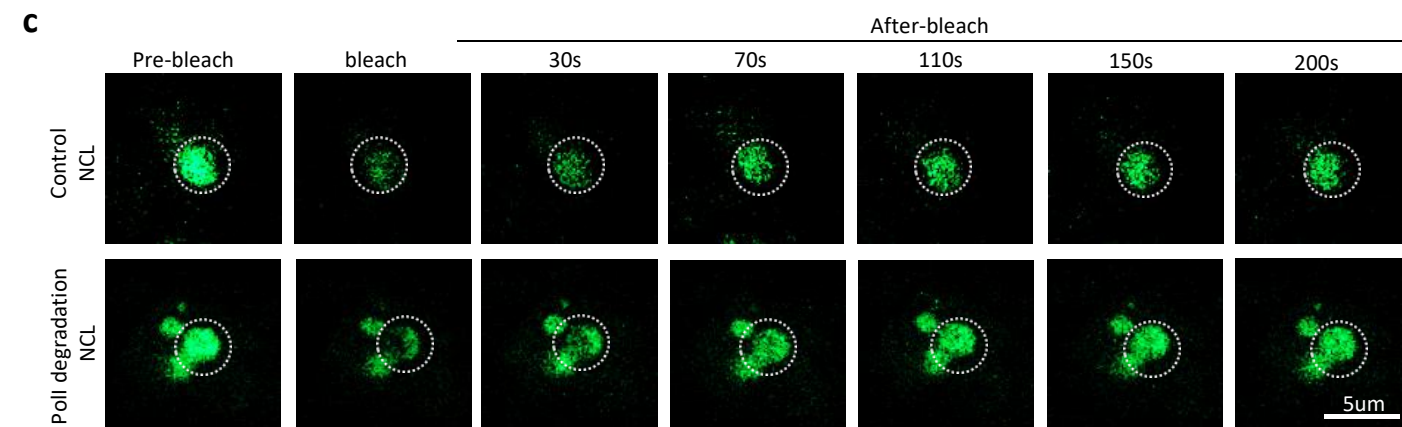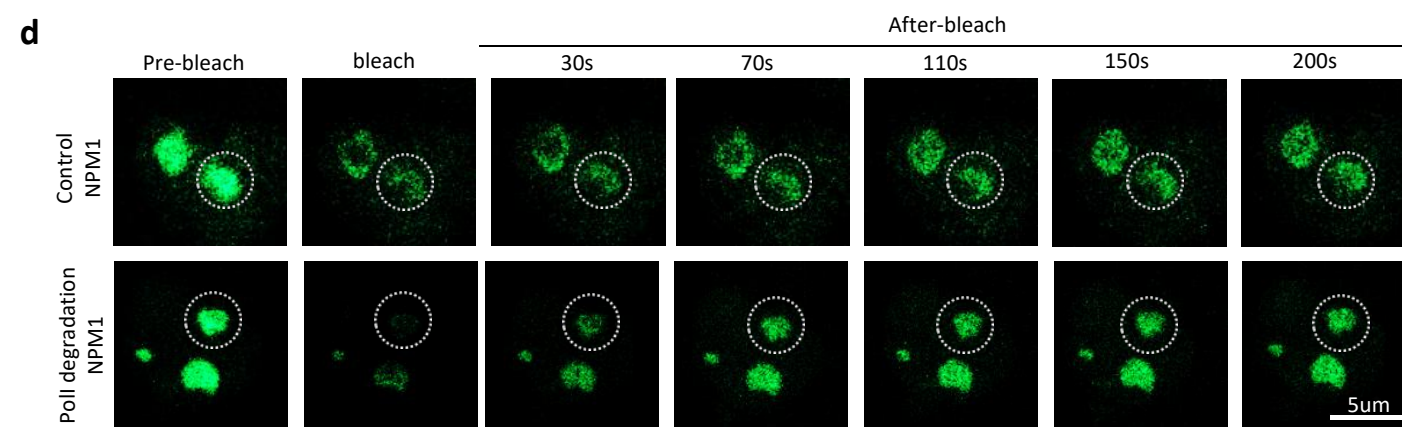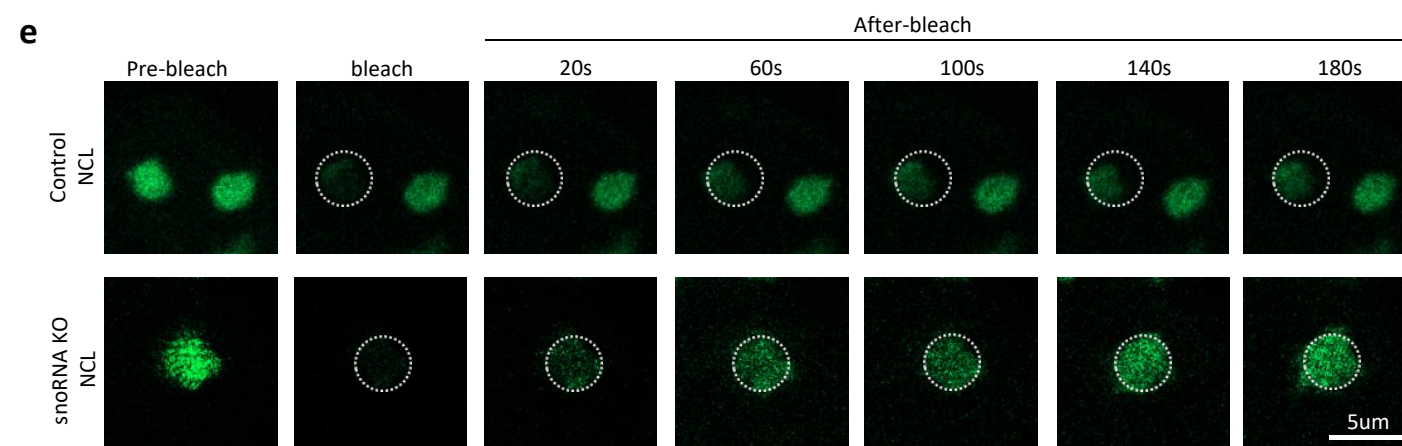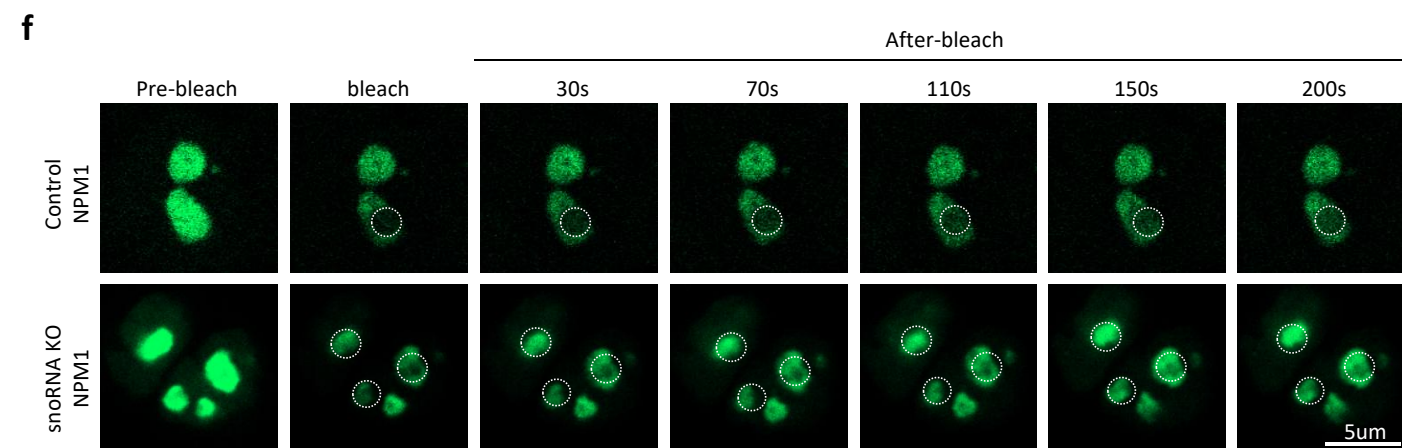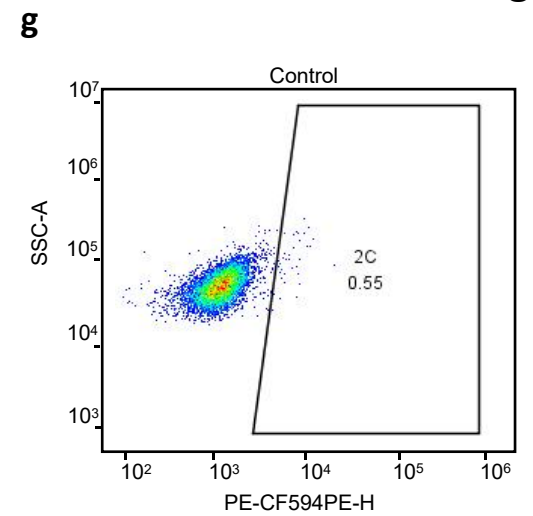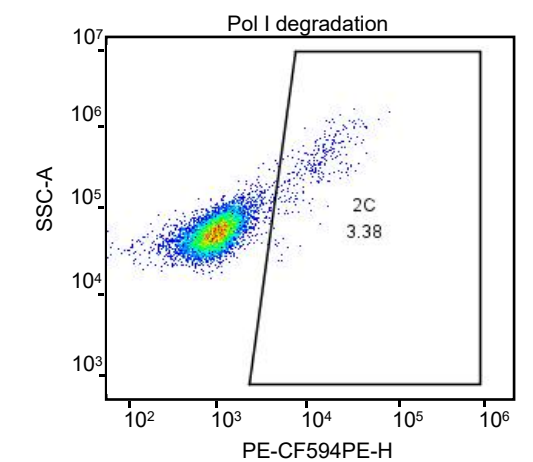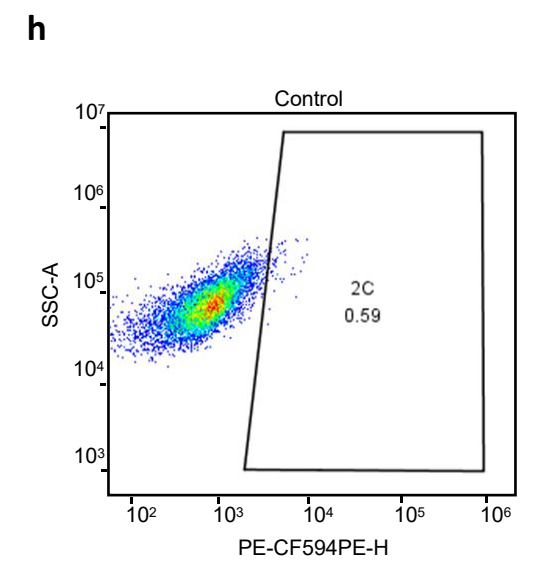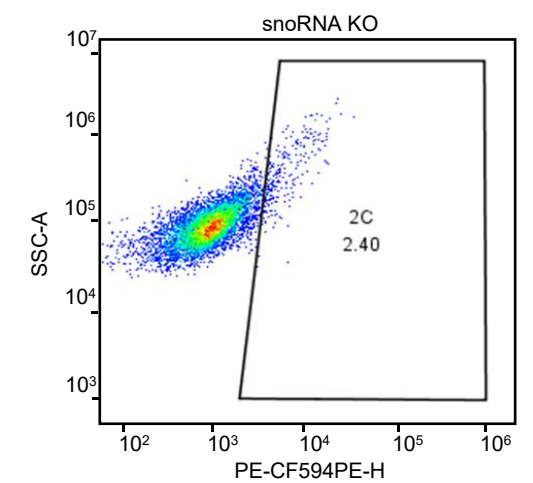

**Extended Data Fig.S5: Genetic interferences of rRNA biogenesis recapitulate CX-5461-induced 2C-like molecular phenotypes, related to Fig.5.** **a)** Western Blotting experiment showing the Pol I protein degradation after 24h of Auxin treatment. **b)** PCR experiment showing that a 400bp band was observed in the snoRNA KO mES cells, but not in the wild-type (WT) mES cells. As a band of 400bp was designed especially in the snoRNA KO mES cells, this result indicates that the homologs of human SNORD113-114 gene cluster was successfully knocked-out. **c)** Shown images are representative of 4 times of NCL FRAP experiments in control mES cells and Pol I degraded mES cells. **d)** Shown images are representative of 4 times of NPM1 FRAP experiments in control mES cells and Pol I degraded mES cells. **e)** Shown images are representative of 4 times of NCL FRAP experiments in control mES cells and snoRNA knockout mES cells. **f)** Shown images are representative of 4 times of NPM1 FRAP experiments in control mES cells and snoRNA knockout mES cells. **g)** FACS analysis on 2C::tdTomato+ mES cells in Pol I degraded mES cell lines, showing the change of percentage of 2C-like cells. **h)** FACS analysis on 2C::tdTomato+ mES cells in snoRNA knockout mES cell lines, showing the change of percentage of 2C-like cells.

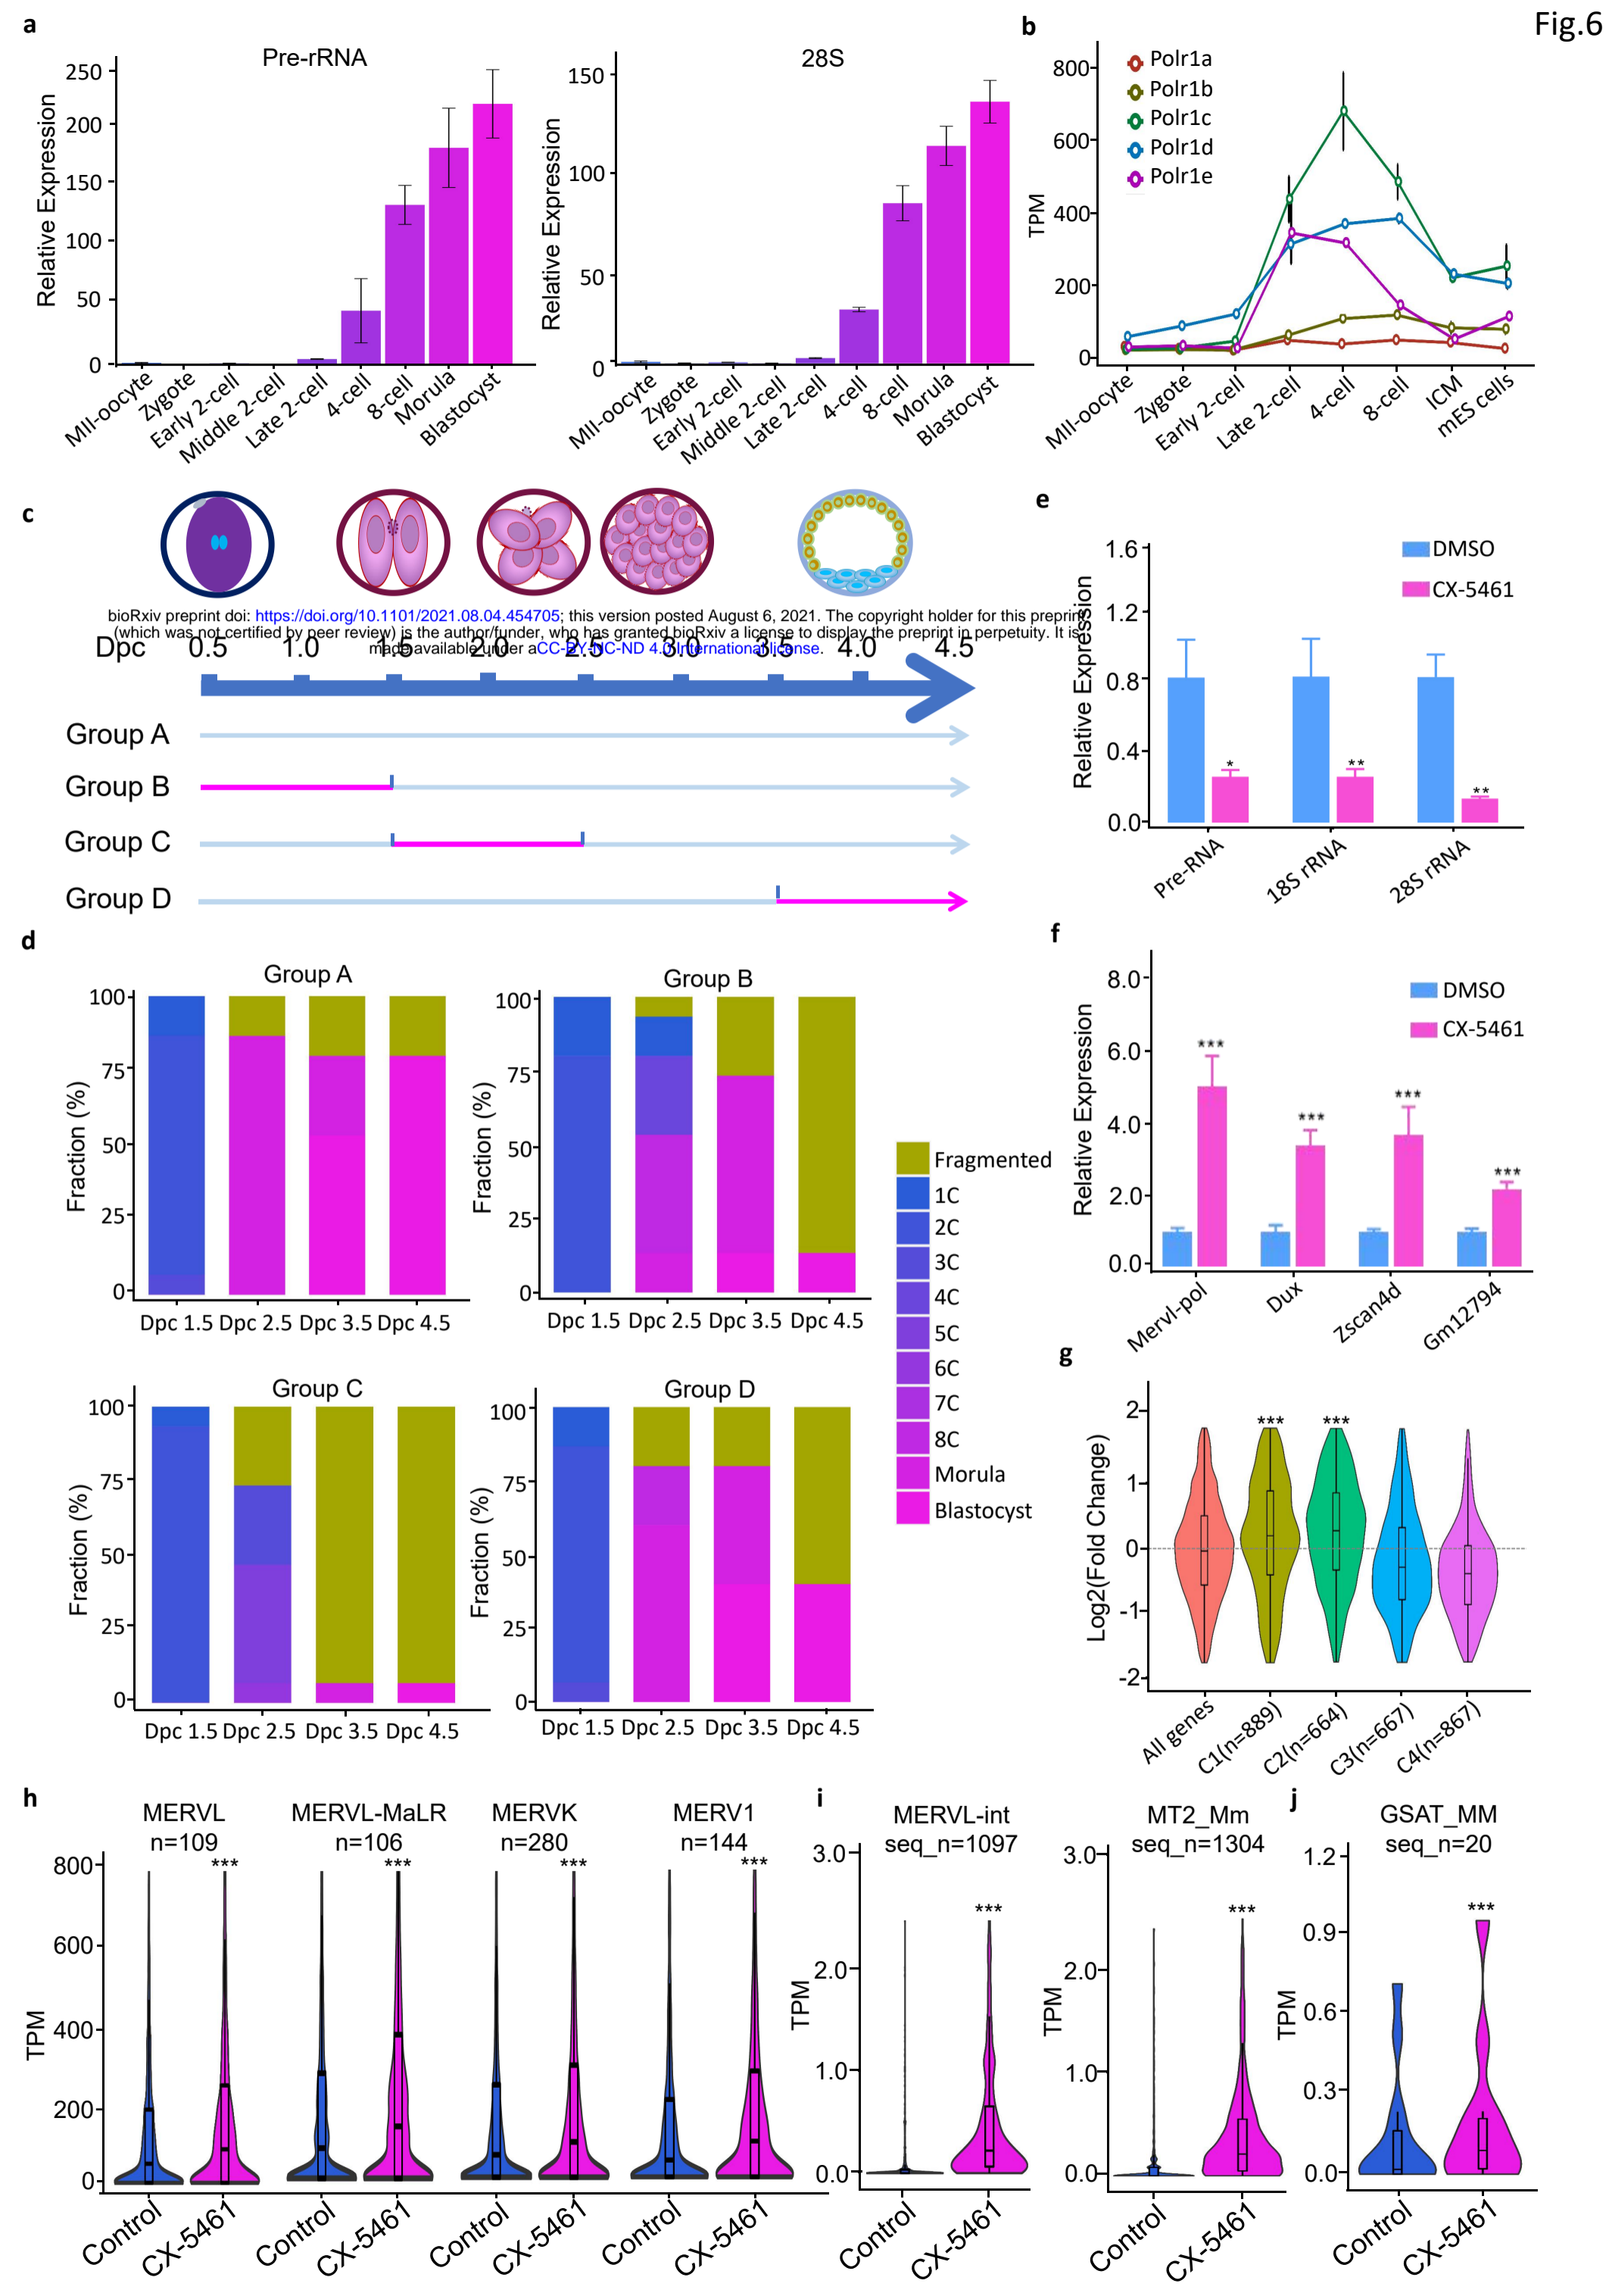

**Fig.6: rRNA biogenesis is critically required at the 2-cell-to-4-cell stage transition during pre-implantation embryo development.** **a)** Expression of pre-rRNA and 28S rRNA across different embryo developmental stages. **b)** Expression of different subunit genes of RNA polymerase I across different embryo developmental stages. **c)** Different schemes of treatment with CX-5461. The 24hrs time window for CX-5461 treatment is highlighted in red; Dpc: Days post-coitum. **d)** Stacked bar plots showing fraction of embryos at different developmental stages with the different CX-5461 treatment schemes in Fig 6c. The numbers of embryos of group A to group D were all 15 embryos. **e)** qRT-PCR showing rRNA expression level in blastocysts, after CX-5461 treatment of morula embryos followed by *in vitro* culture of the treated embryos. \*:  $p < 0.05$ , \*\*:  $p < 0.01$ , two-way ANOVA, the replicates of experiment  $n=3$ . **f)** qRT-PCR showing 2C marker gene expression level in blastocysts, after CX-5461 treatment of morula embryos followed by *in vitro* culture of the treated embryos. \*\*\*:  $p < 0.001$ , two-way ANOVA, the replicates of experiment  $n=3$ . **g)** Violin plots demonstrating the expression level changes of stage-specific gene clusters of mouse pre-implantation embryos (as defined in Extended Data Fig S1) in CX-5461-treated and control blastocyst embryos, \*\*\*:  $p < 0.001$ , Mann-Whitney U test (GEO accession GSE166041). **h)** Violin plots show expression levels of major ERV gene classes in control blastocyst embryos and CX-5461 treated blastocyst embryos;  $n$  denotes the number of sub-classes of ERV genes; \*\*\*:  $p < 0.001$ , Wilcoxon signed rank test (GEO accession GSE166041). **i)** Violin plots show expression levels of ERV gene sub-classes of *MERV1-int* and *MT2\_Mm* in control blastocyst embryos and CX-5461 treated blastocyst embryos;  $seq\_n$  denotes the number of annotated *MERV1-int* and *MT2\_Mm* sequences in the mouse mm10 reference genome; \*: \*\*\*:  $p < 0.001$ , Wilcoxon signed rank test (GEO accession GSE166041). **j)** Violin plots show expression levels of ERV gene sub-classes of *GSAT\_MM* in control blastocyst embryos and CX-5461-treated blastocyst embryos;  $seq\_n$  denotes the number of annotated *GSAT\_MM* sequences in the mouse mm10 reference genome; \*\*\*:  $p < 0.001$ , Wilcoxon signed rank test (GEO accession GSE166041).

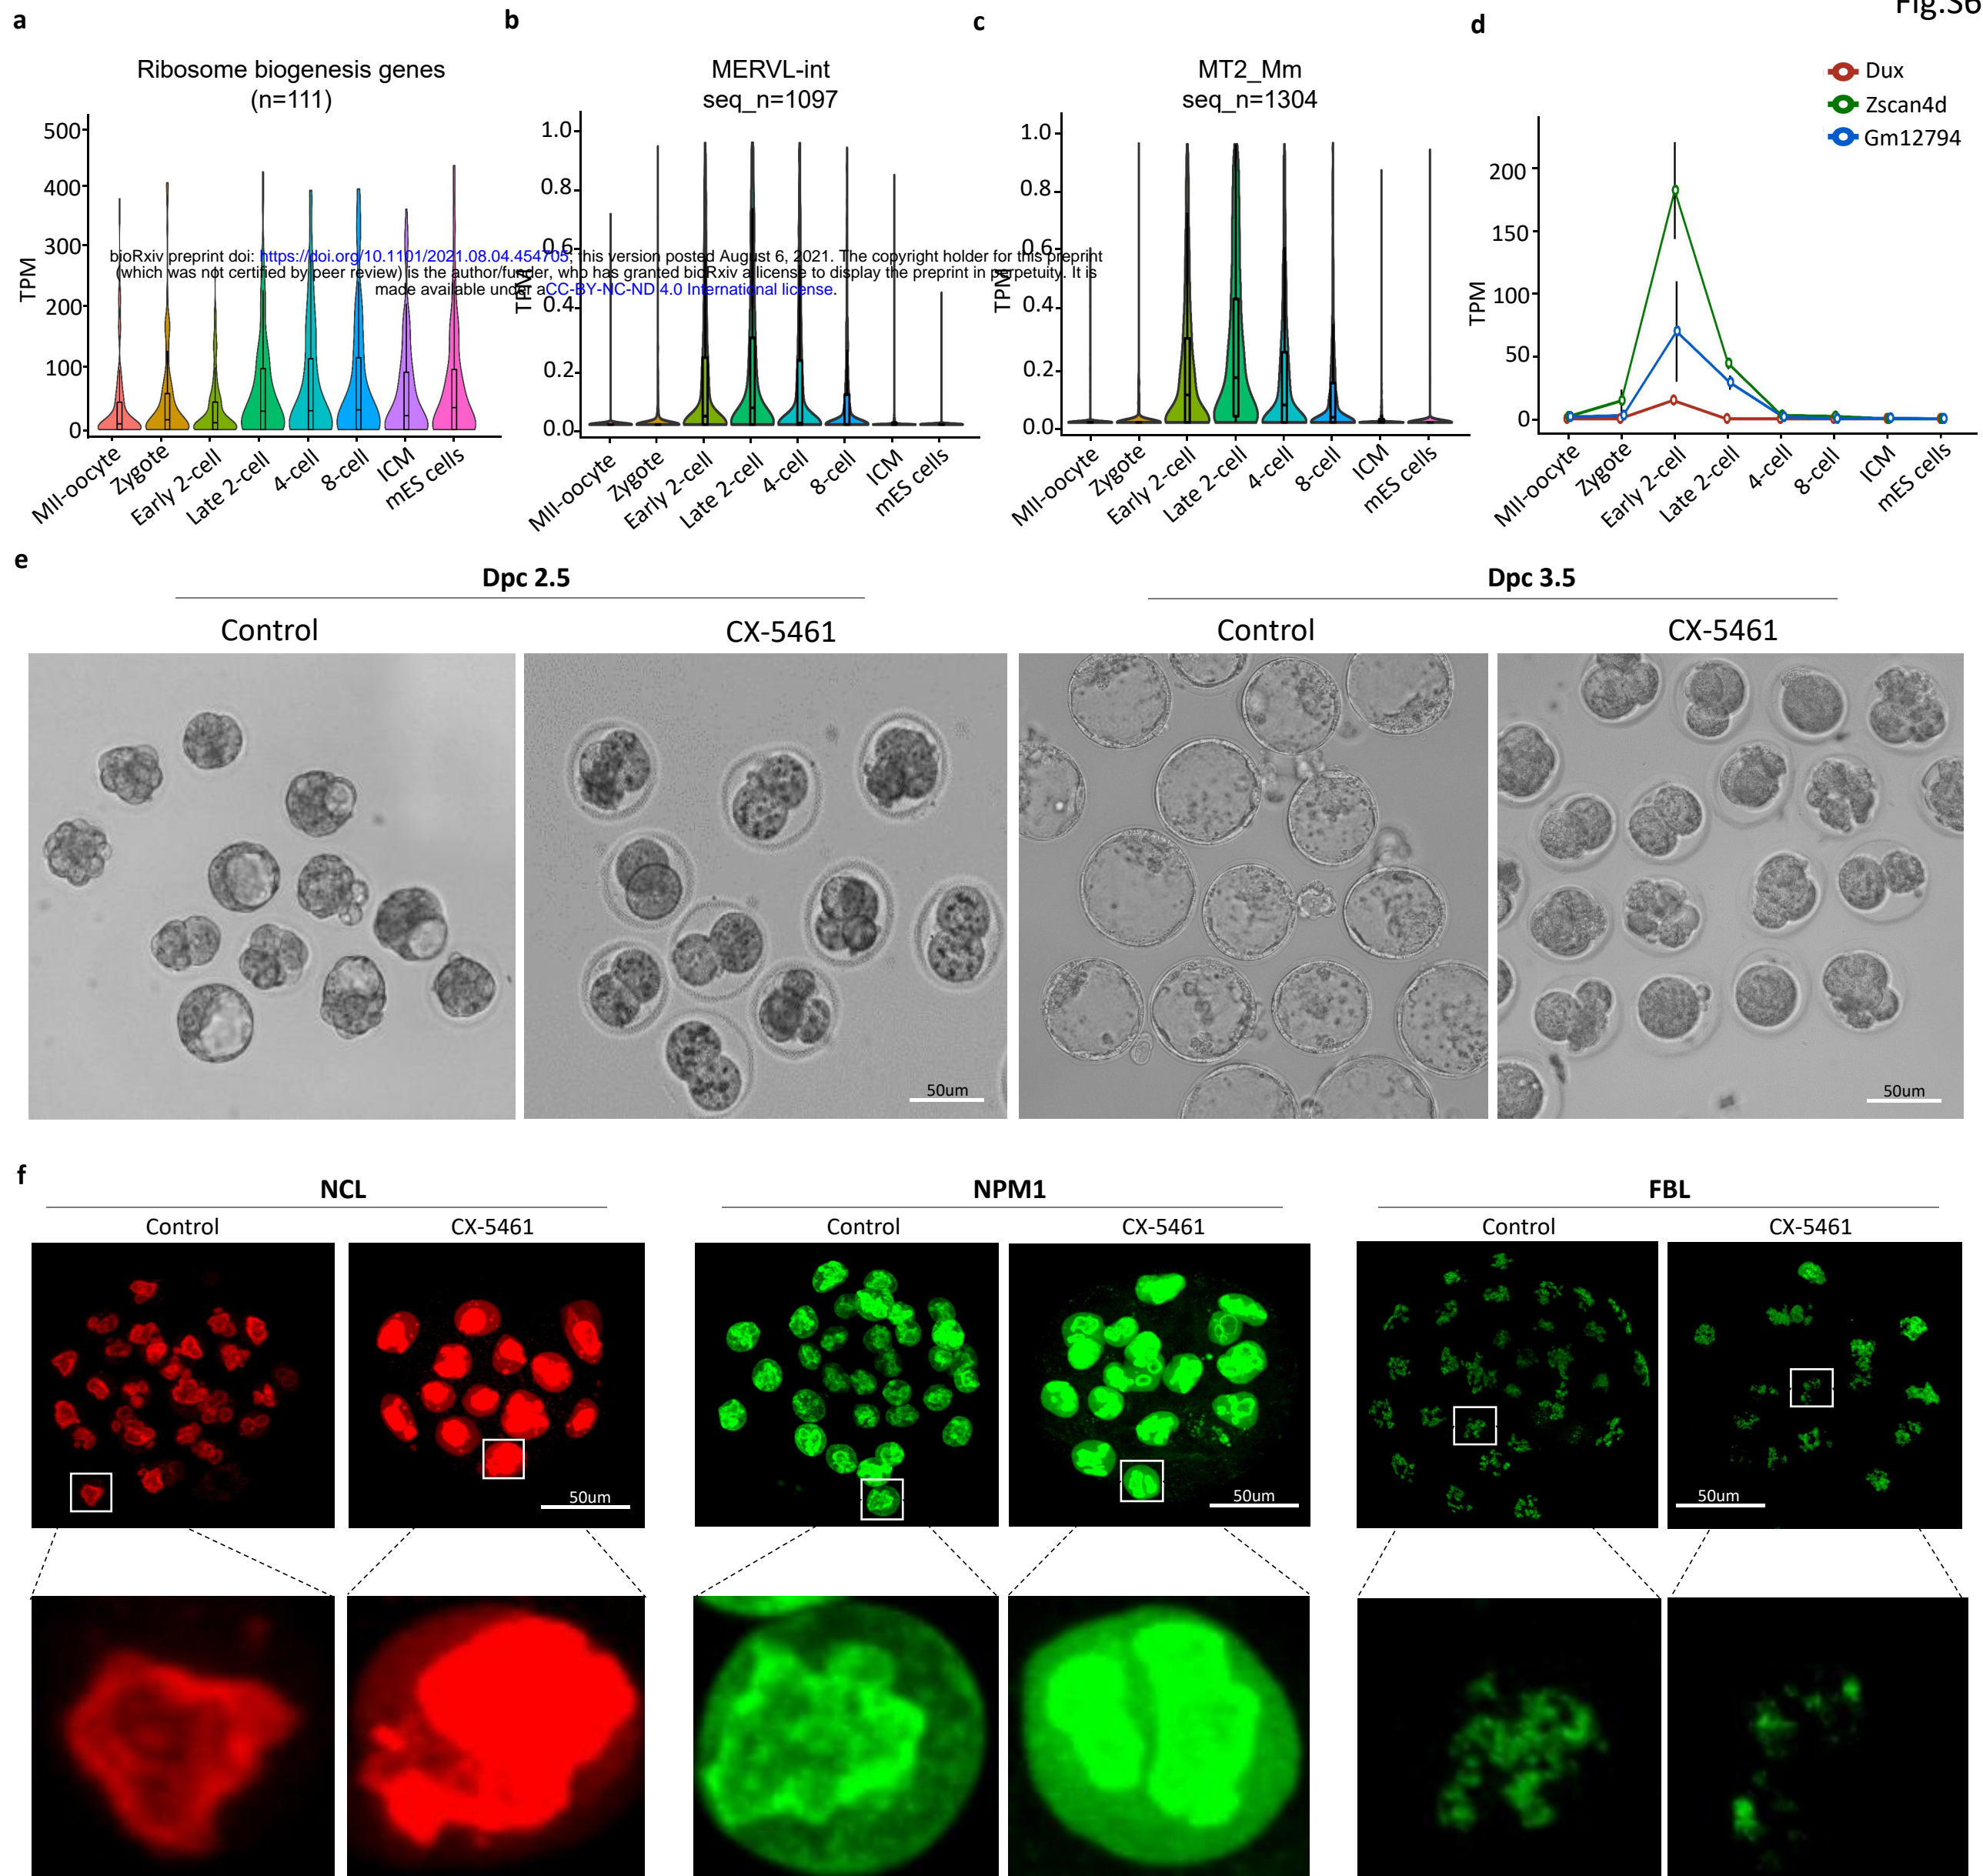



**Extended Data Fig.S6: rRNA biogenesis is critically required at the 2-cell-to-4-cell stage transition during pre-implantation embryo development, related to Fig 6.** **a)** Expression pattern of Ribosome biogenesis genes across different embryo developmental stages. *n* denotes the number of sub-classes of *MERVL* genes. **b)** Expression pattern of *MERVL-int* genes across different embryo developmental stages. *seq\_n* denotes the number of annotated *MERVL-int* sequences in the mouse mm10 reference genome. **c)** Expression pattern of *MT2\_Mm* genes across different embryo developmental stages. *seq\_n* denotes the number of annotated *MT2\_Mm* sequences in the mouse mm10 reference genome. **d)** Expression pattern of 2C marker genes, *Dux*, *Zscan4d* and *Gm12794*, across different embryo developmental stages. **e)** Representative images of mouse embryos produced from control and CX-5461 treatment during two different developmental stages; Dpc: Days post-coitum. This experiment was repeated three times independently with similar results. **f)** Immunofluorescence staining of NCL, NPM1 and FBL in control blastocyst embryos and CX-5461-treated blastocyst embryos.

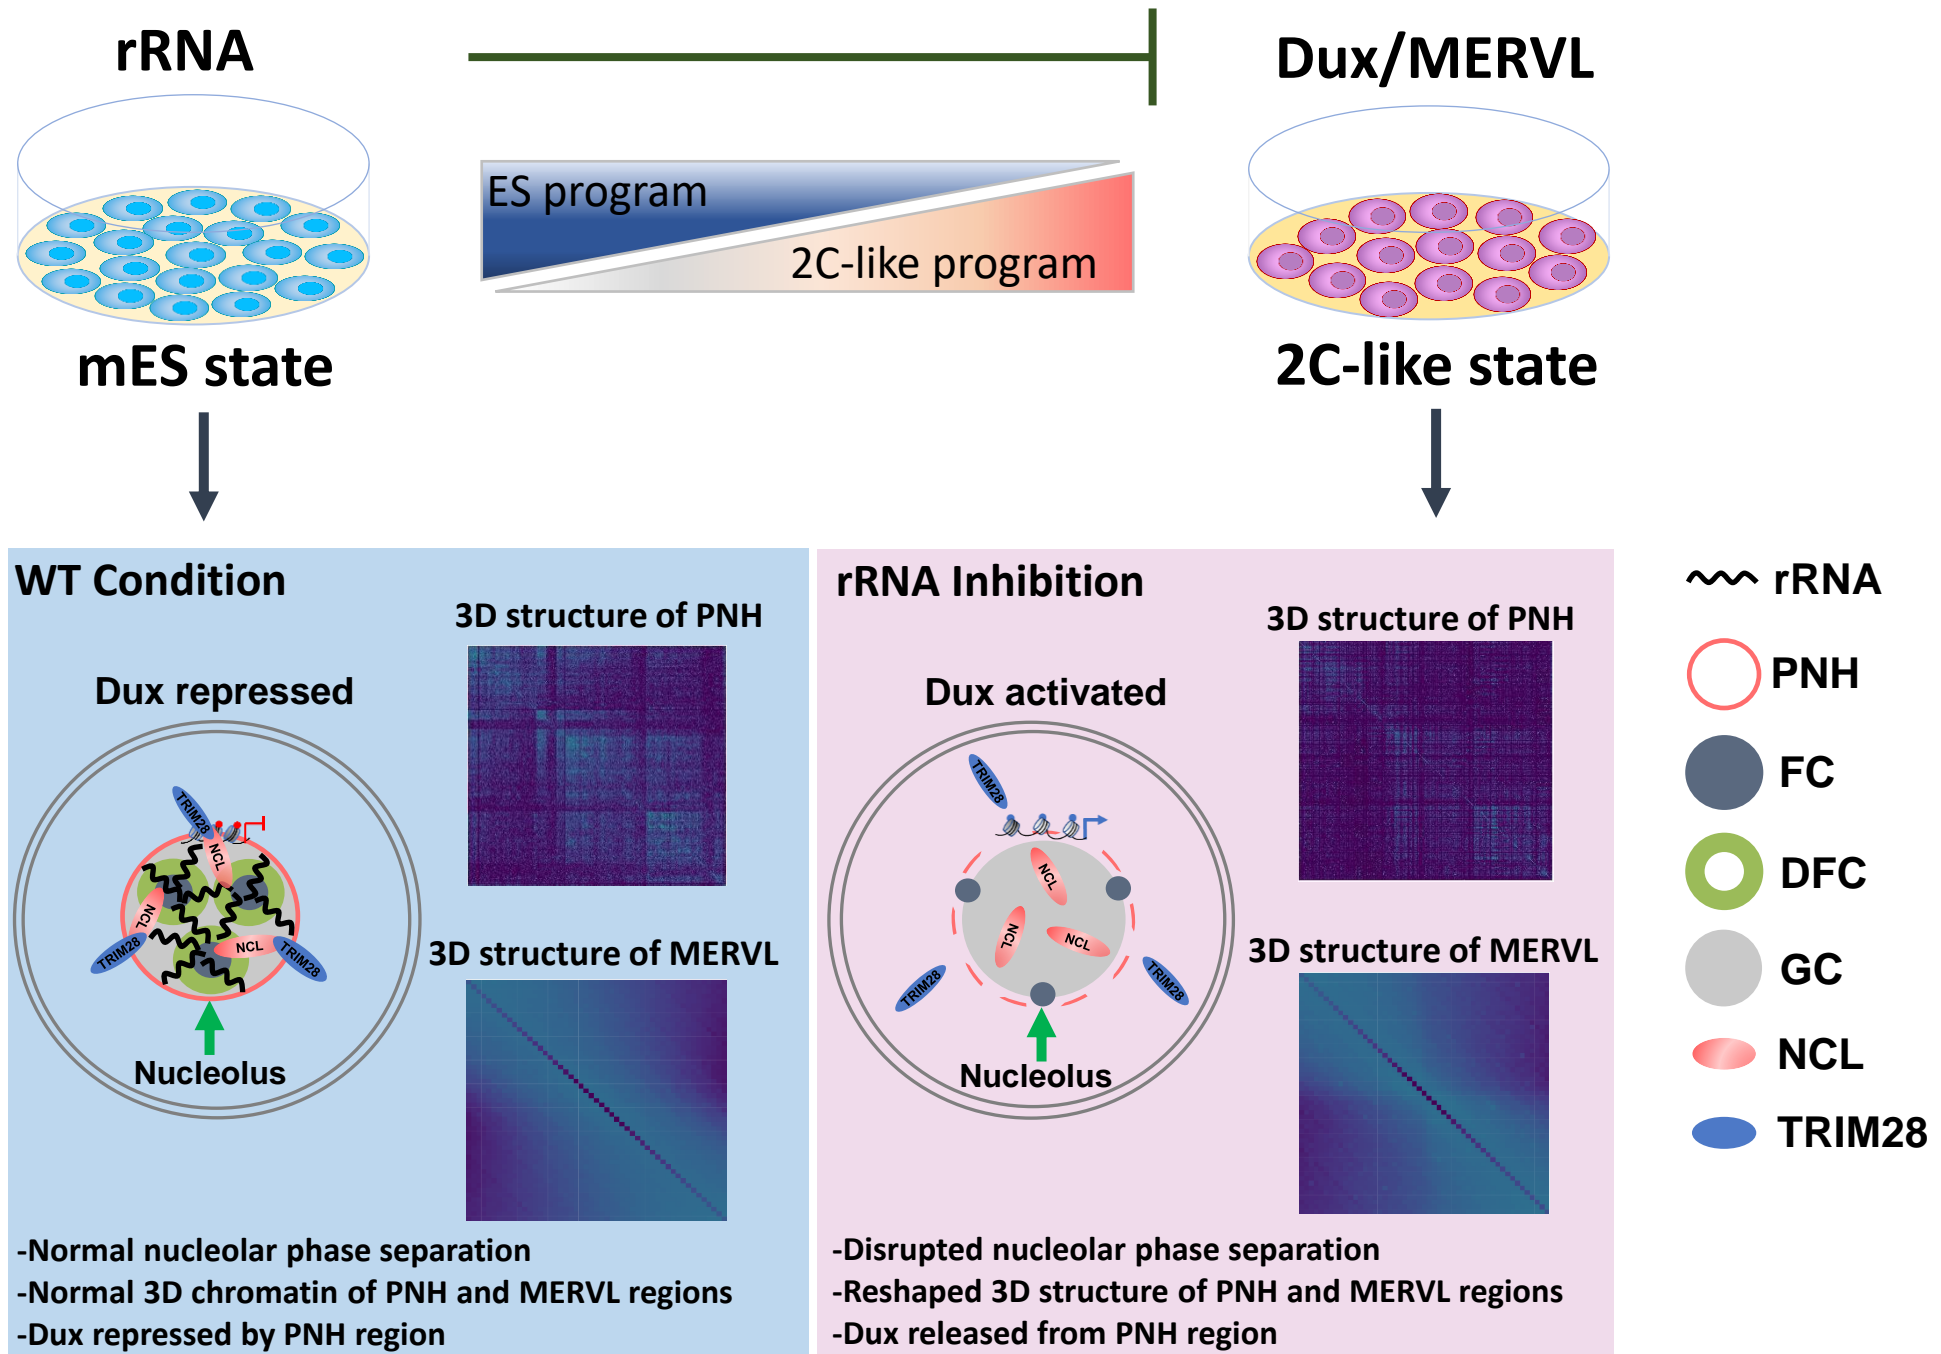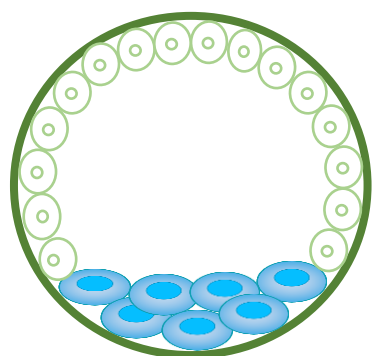

**Blastocyst**

**rRNA biogenesis**

**3D chromatin structure reorganization of PNH region**

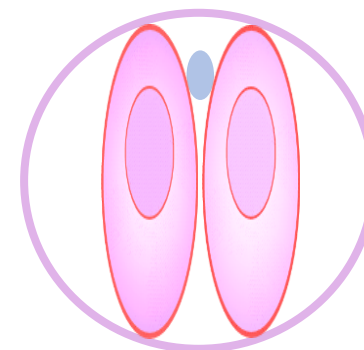

**2-cell**

**Fig.7: A mechanistic model for the role of rRNA biogenesis in regulating the 2C-like program and the homeostasis between 2C-like cells and mES cells.** In the unperturbed mES cells, nucleolar integrity mediated by rRNA biogenesis maintains the normal the liquid-liquid phase separation (LLPS) of nucleolus and the formation of peri-nucleolar heterochromatin (PNH) containing *Dux*, and this normal nucleolar LLPS facilitated NCL/TRIM28 complex occupancy on the *Dux* locus to repress *Dux* expression. In contrast, in the rRNA biogenesis-inhibited mES cells, the liquid-like phase of nucleolus is disrupted, causing dissociation of the NCL/TRIM28 complex from the PNH and changes of epigenetic state and 3D structure of the PNH, which eventually leads to *Dux* to be released from the PNH, activation of 2C-like program and transition of mES cells to 2C-like cells.
